# Supplementary material for: Measuring the impact of COVID-19 on the quality of life of the survivors, partners and family members: a cross-sectional international online survey
Source: PubMed Central journal article supplement — BMJ Open. 2021 May 25;11(5):e047680. doi: 10.1136/bmjopen-2020-047680 (PMC8154981; doi:10.1136/bmjopen-2020-047680), 2021-05-25
Supplement: bmjopen-2020-047680.draft_revisions.pdf [file bmjopen-2020-047680.draft_revisions.pdf]

# BMJ Open

BMJ Open is committed to open peer review. As part of this commitment we make the peer review history of every article we publish publicly available.

When an article is published we post the peer reviewers' comments and the authors' responses online. We also post the versions of the paper that were used during peer review. These are the versions that the peer review comments apply to.

The versions of the paper that follow are the versions that were submitted during the peer review process. They are not the versions of record or the final published versions. They should not be cited or distributed as the published version of this manuscript.

BMJ Open is an open access journal and the full, final, typeset and author-corrected version of record of the manuscript is available on our site with no access controls, subscription charges or pay-per-view fees (<http://bmjopen.bmj.com>).

If you have any questions on BMJ Open's open peer review process please email [info.bmjopen@bmj.com](mailto:info.bmjopen@bmj.com)

# BMJ Open

## Impact of COVID-19 on quality of life of the survivor, partner and family members

|                               |                                                                                                                                                                                                                                                                                                                                                                                  |
|-------------------------------|----------------------------------------------------------------------------------------------------------------------------------------------------------------------------------------------------------------------------------------------------------------------------------------------------------------------------------------------------------------------------------|
| Journal:                      | <i>BMJ Open</i>                                                                                                                                                                                                                                                                                                                                                                  |
| Manuscript ID                 | bmjopen-2020-047680                                                                                                                                                                                                                                                                                                                                                              |
| Article Type:                 | Original research                                                                                                                                                                                                                                                                                                                                                                |
| Date Submitted by the Author: | 04-Dec-2020                                                                                                                                                                                                                                                                                                                                                                      |
| Complete List of Authors:     | Shah, Rubina ; Cardiff University School of Medicine<br>Ali, Faraz ; Cardiff University,<br>Nixon, Stuart; MS society Cardiff UK<br>Ingram, John; Cardiff University School of Medicine<br>Salek, Sam; University of Hertfordshire<br>Finlay, Andrew ; Cardiff University School of Medicine, Department of<br>Dermatology and Wound Healing, Division of Infection and Immunity |
| Keywords:                     | COVID-19, Public health < INFECTIOUS DISEASES, Infection control < INFECTIOUS DISEASES                                                                                                                                                                                                                                                                                           |
|                               |                                                                                                                                                                                                                                                                                                                                                                                  |

SCHOLARONE™  
Manuscripts

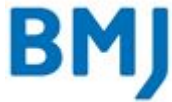

I, the Submitting Author has the right to grant and does grant on behalf of all authors of the Work (as defined in the below author licence), an exclusive licence and/or a non-exclusive licence for contributions from authors who are: i) UK Crown employees; ii) where BMJ has agreed a CC-BY licence shall apply, and/or iii) in accordance with the terms applicable for US Federal Government officers or employees acting as part of their official duties; on a worldwide, perpetual, irrevocable, royalty-free basis to BMJ Publishing Group Ltd ("BMJ") its licensees and where the relevant Journal is co-owned by BMJ to the co-owners of the Journal, to publish the Work in this journal and any other BMJ products and to exploit all rights, as set out in our [licence](#).

The Submitting Author accepts and understands that any supply made under these terms is made by BMJ to the Submitting Author unless you are acting as an employee on behalf of your employer or a postgraduate student of an affiliated institution which is paying any applicable article publishing charge ("APC") for Open Access articles. Where the Submitting Author wishes to make the Work available on an Open Access basis (and intends to pay the relevant APC), the terms of reuse of such Open Access shall be governed by a Creative Commons licence – details of these licences and which [Creative Commons](#) licence will apply to this Work are set out in our licence referred to above.

Other than as permitted in any relevant BMJ Author's Self Archiving Policies, I confirm this Work has not been accepted for publication elsewhere, is not being considered for publication elsewhere and does not duplicate material already published. I confirm all authors consent to publication of this Work and authorise the granting of this licence.

## Impact of COVID-19 on quality of life of the survivor, partner and family members

Rubina M Shah<sup>1</sup>, Faraz M Ali<sup>1</sup>, Stuart Nixon<sup>2</sup>, John R Ingram<sup>1</sup>, Sam S Salek<sup>3,4</sup>, Andrew Y Finlay<sup>1</sup>

<sup>1</sup>Division of Infection and Immunity, Cardiff University, School of Medicine, Cardiff, UK,

<sup>2</sup>Ambassador, Multiple Sclerosis Society, Cardiff, UK.

<sup>3</sup>School of Life & Medical Sciences, University of Hertfordshire, Hatfield, UK, Institute of Medicines Development, Cardiff, UK.

### Corresponding Author

Shah RM<sup>1</sup> email: [ShahR45@cardiff.ac.uk](mailto:ShahR45@cardiff.ac.uk)

**ORCID:** 0000-0001-8158-712X

### Co-authors

Ali FM<sup>1</sup> email: [alifm@cardiff.ac.uk](mailto:alifm@cardiff.ac.uk)

**ORCID:** 0000-0002-4184-2023

Nixon SJ<sup>2</sup> email: [stuart.nixon@mssociety.org.uk](mailto:stuart.nixon@mssociety.org.uk)

Ingram JR<sup>1</sup> email: [ingramjr@cardiff.ac.uk](mailto:ingramjr@cardiff.ac.uk)

**ORCID:** 0000-0002-5257-1142

Salek MS<sup>3</sup> email: [m.s.salek@herts.ac.uk](mailto:m.s.salek@herts.ac.uk)

**ORCID:** 0000 0002 4612 5699

Finlay AY<sup>1</sup> email: [finlayay@cardiff.ac.uk](mailto:finlayay@cardiff.ac.uk)

**ORCID:** 0000 0003 2143 1646

**Word count: 3,575**

## ABSTRACT

### Objective:

This study aimed to measure the impact of COVID-19 on the quality of life (QoL) of survivors and their partners and family members.

### Design and Setting:

A prospective cross-sectional global online survey using social media.

### Participants:

COVID-19 patients and partners or family members (age  $\geq 18$  years).

### Intervention:

Online survey from June to August 2020.

### Main outcome measure:

The EQ-5D-3L to measure the QoL of survivors of COVID-19, and the Family Reported Outcome Measure (FROM-16) to assess the impact on their partner/family member's QoL.

### Results:

The survey was completed by 735 COVID-19 survivors (mean age=48 years; females=563) at a mean of 12.8 weeks after diagnosis and by 571 partners and 164 family members (n=735; mean age=47 years; females=246) from Europe (50.6%), North America (38.5%) and rest of the world (10.9%). The EQ-5D mean score for COVID-19 survivors was 8.65 (SD=1.9, median=9; range=6-14). 81.1% (596/735) reported pain and discomfort, 79.5% (584/735) problems with usual activities, 68.7% (505/735) anxiety and depression and 56.2% (413/735) problems with mobility. Hospitalised survivors (20%, n=148) and survivors with pre-existing health conditions (30%, n=227) reported significantly more problems with mobility and usual activities ( $p < 0.05$ ), with hospitalised also experiencing more impact on self-care ( $p \leq 0.001$ ).

Among 735 partners and family members, the mean FROM-16 score (maximum score = highest impact =32) was 15 (median=15, range=0-32). 93.6% (688/735) reported being worried, 81.7% (601/735) frustrated, 78.4% (676/735) sad, 83.3% (612/735) reported impact on their family activities, 68.9% (507/735) on sleep and 68.1% (500/735) on their sex life.

### Conclusion:

COVID-19 survivors reported a major persisting impact on their physical and psychosocial health. The lives of their partners and other family members were also severely affected. There is a need for a holistic support system sensitive to the needs of COVID-19 survivors and their family members who experience a major "secondary burden".

### Keywords

COVID-19; Long COVID, family impact; partner impact; patient impact; EQ-5D; quality of life; FROM-16; Family- Reported Outcome Measure.

### Strengths and Limitations of this study

- This study provides evidence of the impact on quality of life (QoL) of ‘Long COVID’ in survivors of COVID-19.
- This study fills an important knowledge gap in measuring the impact of survivors’ COVID-19 on the QoL of partners and other family members.
- Large sample size and heterogenous population
- Use of validated tools to assess QoL impact.
- The study was open to COVID survivors and their family members internationally, but only those active on social media who could read and understand English completed the survey.
- Causal relationships cannot be established among the study variables as the study was cross-sectional.

## INTRODUCTION

The COVID-19 pandemic is causing profound changes across the world, but there is little information on its physical and psychosocial impact on survivors and their families. Despite the need (1) for information on the lived experience of infected individuals and their family members, there are only sparse data available.

It is important to ascertain COVID-19’s immediate and persisting (Long COVID) impact on those affected and on their families in order to aid healthcare workers and government agencies to better support them. The understanding of how a person’s health condition impacts the quality of life (QoL) of other family members has increased over the last decade (2). Various questionnaires have been developed to measure this impact, but these are mostly disease specific. A generic measure, the Family Reported Outcome Measure (FROM-16) has been validated across all areas of medicine (3-5)

1 and is therefore suitable for measuring the impact of COVID-19 on the partner and family members  
2  
3  
4 of those affected. As it is a generic measure, data generated can be compared with data from other  
5  
6  
7 medical conditions.  
8  
9

10 The aim of this study was to assess the impact of COVID-19 on survivors and their family members  
11  
12 based on their lived experience of COVID-19 using validated QoL instruments administered using  
13  
14  
15 online social media platforms.  
16  
17

## 18 **METHODS**

### 21 **Settings and participants**

22  
23  
24  
25 This was a prospective cross-sectional global online survey, using an anonymous online  
26  
27  
28 questionnaire. The survey was carried out using <https://www.onlinesurveys.ac.uk/> on a Jisc platform  
29  
30 (6). The survey was distributed through social media platforms including Facebook, Twitter,  
31  
32  
33 LinkedIn, WhatsApp and Reddit.  
34  
35

### 36 **Procedure**

37  
38  
39  
40 Ethics approval was granted by the Cardiff University School of Medicine Research Ethics  
41  
42  
43 Committee (SMREC 20/60). Study participants were provided with information about the study via a  
44  
45 link in the survey to a "Participant Information Sheet" where they were informed that participation  
46  
47  
48 was voluntary, and their data would remain anonymous. Those who decided to take part gave  
49  
50 informed consent at the beginning of the survey. Data collection took place from 30th May to 30th  
51  
52  
53 August 2020.  
54  
55

56 The study was only open to individuals who were diagnosed with COVID-19 and their family  
57  
58  
59 member or partner, adults aged 18 years or above who could read and understand English, and who  
60

1 were able to give written consent and complete the questionnaire using an electronic  
2  
3  
4 device. Participants were excluded if they had not had COVID-19 or if they were less than 18 years of  
5  
6  
7 age.  
8  
9

### 10 **Survey development**

11  
12  
13 The survey included two QoL questionnaires: EQ-5D 3-Level and FROM-16. There were additional  
14  
15 socio-demographic questions such as responder's age, gender and country of residence (Table 1). A  
16  
17 pre-test draft survey was piloted during May 2020 in 20 individuals without COVID-19 across several  
18  
19 countries including the UK, India, and the UAE. Views were also sought from the study research  
20  
21 partners, a patient and two family members. The survey questions were revised based on the  
22  
23  
24  
25  
26 collective feedback.  
27  
28  
29

### 30 **Patient and public involvement**

31  
32  
33 Two patients and one family member were involved as integral study research partners, one of whom  
34  
35 (SJN) is a co-author. They were involved in reviewing the study protocol, drafting the survey,  
36  
37 reviewing the manuscript and providing suggestions from the patient and family perspective.  
38  
39  
40

### 41 **Survey structure**

42  
43  
44  
45 The survey had two sections. Section one was completed by the COVID-19 survivor. Each survivor  
46  
47 provided basic demographic details and provided EQ-5D responses. Section two was completed by  
48  
49 the partner or a close family member of the survivor who provided basic demographic details and  
50  
51 completed FROM-16.  
52  
53  
54

### 55 **Measurement tools**



1 The EQ-5D is a self-reported generic health-related QoL (HRQoL) instrument that specifically  
2  
3 addresses health status (7). It consists of five questions on mobility, self-care, usual activities, pain  
4  
5 and discomfort, and anxiety and depression with 3-point response categories (1= no problems, 2=  
6  
7 some problems and 3= serious or extreme problems). The EQ-VAS component of EQ-5D asks  
8  
9 respondents to rate their overall health status from 0 (worst imaginable health) to 100 (best imaginable  
10  
11 health).  
12  
13  
14  
15

16  
17 The FROM-16 measures the impact of a patient's disease on the QoL of a family member or partner  
18  
19 of a patient (3). The FROM-16 comprises 16 items with 3-point response options for each: not at all  
20  
21 (scoring 0), a little (1) and a lot (2), with a total score range of 0 - 32. The higher the score, the greater  
22  
23 the negative impact on the family member's QoL. The 16 items are divided into two domains:  
24  
25 Emotional (six items, maximum score 12) and Personal and Social Life (ten items, maximum score  
26  
27 20). The FROM-16 has proven psychometric properties, a rapid completion time of two minutes (3)  
28  
29 and translations are available in several languages (4).  
30  
31  
32  
33  
34  
35  
36  
37

38 **Outcome:** The primary outcome was to measure the impact of COVID-19 on survivors and their  
39  
40 partners and family members.  
41  
42

43 **Exposure:** Person's COVID-19 infection and its impact on partners and family members.  
44  
45

46 **Covariates:** The covariates included hospital stay due to COVID-19 infection, existing health  
47  
48 condition of survivors, duration of COVID-19 infection, partners and family members who also  
49  
50 developed COVID-19, family members' relationship to survivors, country of residence, age and sex  
51  
52 of family members and survivors.  
53  
54  
55  
56  
57  
58  
59  
60

**Missing data:** There were no missing data, but two responses were ambiguous for one of the variables (EQ-5D-VAS) and were excluded from the analysis.

### Statistical analysis

Descriptive analyses were performed for all variables. The Shapiro–Wilk test was used to examine normal distribution of continuous variables. The required assumptions for normal distribution were not met. Consequently, data analysis employed non-parametric statistical method. To determine differences between groups defined by each outcome, chi-square tests (when appropriate, Fisher's exact tests) and Mann-Whitney U tests were computed. Spearman's rank correlation coefficient and multiple regression analysis were conducted to understand the effect of independent variables (i.e. predictors) on the EQ-5D and FROM-16 outcomes. Statistical Product and Service Solutions SPSS® (version 25) was used and the probability of type I error was set at  $p < 0.05$ .

## RESULTS

### Sociodemographic characteristics of the study participants

A total of 1,254 respondents consented to participate in the survey: 765 completed both sections. Thirty responses were excluded as the respondents were below the age of 18 years. The final analysis included 735 COVID-19 survivors and their family members/partner from Europe (50.6%), North America (38.5%) and the rest of the world (10.9%) (Table 1).

**Table 1** Sociodemographic characteristics of the study participants

| Variables                         | Categories | N (%) or N(SD) |
|-----------------------------------|------------|----------------|
| <b>COVID-19 Survivors (n=735)</b> |            |                |
| Gender                            | Male       | 172 (23.4%)    |
|                                   | Female     | 563 (76.6%)    |
| Age (years)                       | Mean (SD)  | 47.77 (11.656) |

|    |                               |                                    |                |
|----|-------------------------------|------------------------------------|----------------|
| 1  |                               | Median                             | 48.00          |
| 2  |                               | Range                              | 19-85          |
| 3  |                               |                                    |                |
| 4  |                               |                                    |                |
| 5  | Duration of COVID-19          | Mean (SD)                          | 12.76 (6.104)  |
| 6  | (weeks)                       | Median                             | 13.00          |
| 7  |                               | Range                              | 1-36           |
| 8  |                               |                                    |                |
| 9  |                               | ≥4 weeks                           | 98 (13.3%)     |
| 10 |                               | 5-11 weeks                         | 170 (23.1%)    |
| 11 |                               | ≥12 weeks                          | 467 (63.5%)    |
| 12 |                               |                                    |                |
| 13 |                               |                                    |                |
| 14 | Occupation                    | Unemployed                         | 19 (2.6%)      |
| 15 |                               | In paid work                       | 538 (73.2%)    |
| 16 |                               | In education or training           | 26 (3.5%)      |
| 17 |                               | In unpaid work                     | 7 (1%)         |
| 18 |                               | Work in the home/manage the family | 60 (8.2%)      |
| 19 |                               | Retired                            | 66 (9%)        |
| 20 |                               | Rather not say                     | 19 (2.6%)      |
| 21 |                               |                                    |                |
| 22 |                               |                                    |                |
| 23 | Pre-existing health           | Yes                                | 508 (69.1%)    |
| 24 | conditions                    | No                                 | 227 (30.9%)    |
| 25 |                               |                                    |                |
| 26 |                               |                                    |                |
| 27 | Hospitalised for COVID-19     | No                                 | 587 (79.9%)    |
| 28 |                               | Yes                                | 148 (20.1%)    |
| 29 |                               |                                    |                |
| 30 | Regions                       | Europe                             | 372 (50.6%)    |
| 31 |                               | North America                      | 283 (38.5%)    |
| 32 |                               | Rest of the World                  | 80 (10.9%)     |
| 33 |                               |                                    |                |
| 34 | <b>Family members (N=735)</b> |                                    |                |
| 35 | Gender                        | Male                               | 489 (66.5%)    |
| 36 |                               | Female                             | 246 (33.5%)    |
| 37 |                               |                                    |                |
| 38 | Age (years)                   | Mean (SD)                          | 47.43 (13.582) |
| 39 |                               | Median                             | 48.00          |
| 40 |                               | Range                              | 18-87          |
| 41 |                               |                                    |                |
| 42 |                               |                                    |                |
| 43 | Occupation                    | Unemployed                         | 42 (5.7%)      |
| 44 |                               | In paid work                       | 530 (72.1%)    |
| 45 |                               | In education or training           | 29 (3.9%)      |
| 46 |                               | In unpaid work                     | 18 (2.4%)      |
| 47 |                               | Retired                            | 95 (12.9%)     |
| 48 |                               | Rather not say                     | 21 (2.9%)      |
| 49 |                               |                                    |                |
| 50 |                               |                                    |                |
| 51 | Relationship to the person    | Spouse/Partner                     | 571 (77.7%)    |
| 52 | affected with COVID-19        | Parents                            | 48 (6.5%)      |
| 53 |                               | Son/Daughter                       | 77 (10.5%)     |
| 54 |                               | Brother/Sister                     | 24 (3.3%)      |
| 55 |                               | Other                              | 15 (2%)        |
| 56 |                               |                                    |                |
| 57 |                               |                                    |                |
| 58 | Diagnosed with COVID-19       | No                                 | 380 (51.7%)    |
| 59 |                               | Yes                                | 355 (48.3%)    |
| 60 |                               |                                    |                |

Of the 735 COVID-19 survivors, 76.6% were females (mean and median age=48 years) and 73.3% were in paid employment. The mean time since COVID-19 symptoms started was 12.8 weeks (median=13 weeks). In 86.6% (n=637) > 4 weeks had elapsed since COVID-19 symptoms started and in 63.5% (n=467) >12 weeks had elapsed. Of the family members (mean age=48 years, median=47 years), 66.5 % were male and 72.1% were in paid employment. Most of the family members were partners (77.7%), followed by sons and daughters (10.5%) and parents (6.5%). In addition, 48.3 % of the family members had also contracted COVID-19 (Table 1).

### Quality of life impact of COVID-19 on survivors

The EQ-5D mean score was 1.73 (SD=0.39) with the 'usual activities' item scoring the highest (mean=2.06, max 3) followed by pain/discomfort (1.93) and anxiety/depression (1.84). The mean score of the visual analogue part of EQ-5D was 55 (SD=22.94) (Table 2).

**Table 2** Mean scores of EQ-5D and FROM-16 (n=735)

| Scale                   | Mean (SD)          | Median (interquartile range) | Range |
|-------------------------|--------------------|------------------------------|-------|
| <b>EQ-5D-3L domains</b> |                    |                              |       |
| Overall                 | 8.65 (1.97)        | 9 (3)                        | 6-14  |
| Mobility                | 1.59 (0.54)        | 2 (1)                        | 1-3   |
| Self-Care               | 1.23 (0.45)        | 1 (0)                        | 1-3   |
| Usual Activities        | <b>2.06</b> (0.68) | 2 (1)                        | 1-3   |
| Pain / Discomfort       | <b>1.93</b> (0.56) | 2 (0)                        | 1-3   |
| Anxiety / Depression    | <b>1.84</b> (0.67) | 2 (1)                        | 1-3   |
| EQ-VAS n(733)           | 55.83 (22.94)      | 60(35)                       | 3-100 |
| <b>FROM-16</b>          |                    |                              |       |
| Overall                 | 15.00 (8.05)       | 15 (13)                      | 0-32  |
| <b>Emotional Domain</b> |                    |                              |       |
| Worried                 | <b>1.43</b> (0.61) | 1 (1)                        | 0-3   |
| Angry                   | 0.75 (0.73)        | 1(1)                         | 0-3   |
| Sad                     | <b>1.05</b> (0.70) | 1 (1)                        | 0-3   |
| Frustrated              | <b>1.24</b> (0.74) | 1 (1)                        | 0-3   |
| Talking about thoughts  | 0.84 (0.79)        | 1 (1)                        | 0-3   |

|    |                                   |                    |         |      |
|----|-----------------------------------|--------------------|---------|------|
| 1  | Difficulty caring                 | 0.81 (0.76)        | 1 (1)   | 0-3  |
| 2  | <b>Personal and Social Domain</b> | 8.88 (5.51)        | 9.0 (9) | 0-20 |
| 3  | Time for self                     | 0.74 (0.76)        | 1 (1)   | 0-3  |
| 4  | Everyday travel                   | 0.63 (0.78)        | 0 (1)   | 0-3  |
| 5  | Eating habits                     | 0.65 (0.73)        | 0 (1)   | 0-3  |
| 6  | Family activities                 | <b>1.26</b> (0.73) | 1 (1)   | 0-3  |
| 7  | Holiday                           | <b>1.10</b> (0.88) | 1 (2)   | 0-3  |
| 8  | Sex life                          | <b>1.09</b> (0.85) | 1 (2)   | 0-3  |
| 9  | Work or study                     | 0.84 (0.79)        | 1 (1)   | 0-3  |
| 10 | Family Relationship               | 0.73 (0.76)        | 1 (1)   | 0-3  |
| 11 | Family expenses                   | 0.83 (0.82)        | 1 (2)   | 0-3  |
| 12 | Sleep                             | <b>1.01</b> (0.79) | 1(2)    | 0-3  |

13  
14  
15  
16  
17  
18  
19  
20  
21  
22  
23  
24  
25  
26  
27  
28  
29  
30  
31  
32  
33

Of the five dimensions of EQ-5D, 'pain and discomfort' was the impact most frequently reported (81.1%; 68.7 % some problems and 12.4% extreme problems), followed by usual activities (79.5%; 53.2% and 26.3%) and anxiety and depression (68.7%; 53.3% and 15.4% ). There was a significant gender difference for 'mobility' and for 'pain and discomfort' ( $p \leq 0.05$ ) with females being more impacted than males (Fig 1).

34  
35  
36  
37  
38

There was no significant difference in EQ-5D mean scores between survivors with an existing health condition (30.9%) and those without, except for mobility and usual activities ( $p \leq 0.05$ ) (Table 3).

39  
40  
41  
42  
43  
44  
45  
46  
47

There was a significant difference between the survivors who had been hospitalised for COVID-19 (20%) and those who had not, with the hospitalised survivors being more severely affected across mobility, self-care ( $p \leq 0.001$ ) and usual activities ( $p \leq 0.02$ ) (Table 3).

48  
49  
50  
51  
52  
53  
54  
55  
56  
57  
58

There were significant differences in EQ-5D mean scores between survivors with respect to onset of COVID-19 symptoms ( $p < 0.001$ ). Mean EQ-5D scores of survivors having COVID-19 symptoms for up to 4 weeks was 8.03 (SD=1.97), 5-11 weeks was 8.3 (SD=2.13) and 12 weeks and above was 8.9 (SD=1.86).

### 59 60

#### Quality of life impact of COVID-19 on family members

1 The mean FROM-16 score was 15, reflecting the extent of the impact of the survivors' COVID-19 on  
2  
3  
4 the HRQoL of their family members (Table 2). The mean score of each of the 16 items is given in  
5  
6 Table 2 with 'Feeling worried' scoring highest (1.46) followed by family activities, frustration,  
7  
8 holiday, and sex life (1.26, 1.24, 1.10 and 1.09, respectively) (Table 2).  
9  
10  
11  
12  
13  
14  
15  
16  
17  
18  
19  
20  
21  
22  
23  
24  
25  
26  
27  
28  
29  
30  
31  
32  
33  
34  
35  
36  
37  
38  
39  
40  
41  
42  
43  
44  
45  
46  
47  
48  
49  
50  
51  
52  
53  
54  
55  
56  
57  
58  
59  
60

For peer review only

Table 3 Comparisons\* of EQ-5D scores for gender, pre-existing health condition and hospitalisation

| EQ-5D domain         | Gender       |                | p-value**    | Pre-existing health condition |            | p-value**    | Hospitalised for COVID-19 |            | p-value**     |
|----------------------|--------------|----------------|--------------|-------------------------------|------------|--------------|---------------------------|------------|---------------|
|                      | Mean score   |                |              | Mean score                    |            |              | Mean score                |            |               |
|                      | Male (n=172) | Female (n=563) |              | Yes (n=227)                   | No (n=508) |              | Yes (n=148)               | No (n=587) |               |
| Overall              | 8.33         | 8.74           | <b>0.036</b> | 8.89                          | 8.54       | <b>0.012</b> | 9.17                      | 8.51       | <b>0.001</b>  |
| Mobility             | 1.51         | 1.61           | <b>0.037</b> | 1.67                          | 1.55       | <b>0.006</b> | 1.75                      | 1.54       | <b>0.0001</b> |
| Self-Care            | 1.22         | 1.24           | 0.602        | 1.28                          | 1.21       | 0.053        | 1.36                      | 1.20       | <b>0.0001</b> |
| Usual Activities     | 1.97         | 2.08           | 0.065        | 2.14                          | 2.02       | <b>0.034</b> | 2.19                      | 2.02       | <b>0.009</b>  |
| Pain / Discomfort    | 1.82         | 1.97           | <b>0.002</b> | 1.93                          | 1.94       | 0.989        | 1.99                      | 1.92       | 0.141         |
| Anxiety / Depression | 1.81         | 1.85           | 0.611        | 1.88                          | 1.82       | 0.289        | 1.88                      | 1.83       | 0.427         |

\*Mann Whitney U test

\*\*p values were calculated using mean rank scores but mean scores are presented here for ease of understanding.

For peer review only

Of the FROM-16 items, the feeling of being worried was most frequently reported (93.6%; 44.6% a little, 49% a lot), followed by family activities (83.3%; 41% , 42.3%), feeling of frustration (81.7%; 39.7% , 42% ), feeling sad (78.4%; 51.2%, 27.2 %), sleep (68.9%; 37.1%, 31.8 %) and sex life (68.1%; 26.7%, 41.4%) (Fig 2).

There was a significant gender difference among family members, with females feeling more sad, experiencing more impact on everyday travel ( $p \leq 0.01$ ) and on their sleep  $p \leq 0.05$ ). The impact on sex life was experienced significantly more by males than females ( $p \leq 0.001$ ) (Table 4).

**Table 4** Comparisons\* of FROM-16 scores for gender and for whether diagnosed with COVID-19 (n=735)

| FROM-16 Items          | Gender          |                   | p-value**    | Diagnosed with COVID-19 |               | p-value**    |
|------------------------|-----------------|-------------------|--------------|-------------------------|---------------|--------------|
|                        | Mean score      |                   |              | Mean score              |               |              |
|                        | Male<br>(n=489) | Female<br>(n=246) |              | Yes<br>(n=355)          | No<br>(n=380) |              |
| Overall                | 14.81           | 15.36             | 0.401        | 15.74                   | 14.32         | <b>0.017</b> |
| Worried                | 1.40            | 1.48              | 0.068        | 1.46                    | 1.39          | 0.135        |
| Angry                  | 0.73            | 0.79              | 0.332        | 0.77                    | 0.74          | 0.519        |
| Sad                    | 1.00            | 1.16              | <b>0.004</b> | 1.09                    | 1.03          | 0.225        |
| Frustrated             | 1.23            | 1.26              | 0.569        | 1.30                    | 1.18          | 0.054        |
| Talking about thoughts | 0.83            | 0.87              | 0.651        | 0.89                    | 0.80          | 0.132        |
| Difficulty caring      | 0.79            | 0.85              | 0.324        | 0.81                    | 0.80          | 0.847        |
| Time for self          | 0.70            | 0.83              | <b>0.036</b> | 0.78                    | 0.71          | 0.164        |
| Everyday travel        | 0.58            | 0.72              | <b>0.048</b> | 0.64                    | 0.62          | 0.874        |
| Eating habits          | 0.64            | 0.67              | 0.565        | 0.72                    | 0.59          | <b>0.015</b> |
| Family activities      | 1.28            | 1.21              | 0.144        | 1.32                    | 1.20          | <b>0.041</b> |
| Holiday                | 1.10            | 1.10              | 0.992        | 1.17                    | 1.03          | <b>0.030</b> |
| Sex life               | 1.22            | 0.84              | <b>0.000</b> | 1.17                    | 1.03          | <b>0.035</b> |
| Work or study          | 0.83            | 0.87              | 0.485        | 0.92                    | 0.77          | <b>0.013</b> |
| Family relationships   | 0.69            | 0.79              | 0.109        | 0.75                    | 0.70          | 0.281        |
| Family expenses        | 0.81            | 0.87              | 0.367        | 0.84                    | 0.83          | 0.759        |
| Sleep                  | 0.98            | 1.07              | 0.138        | 1.12                    | 0.90          | <b>0.000</b> |

\*Mann Whitney U test

\*\*p values were calculated using mean rank scores but mean scores are presented here for ease of understanding.

Those with a COVID-19 history experienced a greater impact on eating habits, work and study, family activities, holiday, ( $p \leq 0.05$ ), sex life and sleep ( $p \leq 0.001$ ). There were no significant differences for the remaining 10 items of FROM-16 (Table 4 and Fig 3).



1 There were significant differences in FROM-16 mean scores between family members of survivors  
2  
3  
4 with respect to onset of COVID-19 symptoms ( $p < 0.01$ ). Mean FROM-16 scores of family members  
5  
6 of survivors having COVID-19 symptoms for up to 4 weeks was 16.11 (SD=7.35), 5-11 weeks was  
7  
8 13.31 (SD=7.77) and 12 weeks and above was 15.38 (SD=8.21).  
9  
10

### 11 **Relationship between the quality of life of survivors and their family members**

12  
13  
14  
15  
16 There were significant positive correlations between the EQ-5D score and the survivors' gender,  
17  
18 hospital stay, existing health condition and time since COVID-19 onset ( $p < 0.05$ ,  $p < 0.001$ ) (Table  
19  
20  
21 5).  
22

23  
24 There was a significant positive association between the family members' FROM-16 scores and the  
25  
26 survivors' EQ-5D scores ( $p < 0.001$ ) (Fig 4) and a significant negative association between FROM-16  
27  
28 scores and the family members' age, survivors' age and EQ-VAS scores ( $p < 0.05$ ).  
29  
30

31  
32 The EQ-VAS scores showed a significant inverse relationship with EQ-5D ( $p < 0.01$ ). However, other  
33  
34 variables such as hospital stay, existing health condition, number of weeks since COVID-19,  
35  
36 survivors' age and gender indicated that being female or being older was associated with lower EQ-  
37  
38 VAS scores ( $p < 0.05$ ), that is lower health status.  
39  
40  
41  
42

### 43 **Can quality of life predict outcomes?**

44  
45  
46  
47 The results of multiple regression analyses indicated that survivors' demographics, duration of  
48  
49 COVID-19 and hospital stay were significant predictors of the extent of impact on QoL of the  
50  
51 survivor ( $p=0.001$ ) while the survivors' pre-existing condition was not a predictor (Tables 6).  
52  
53

54  
55 Inclusion of variables such as EQ-5D scores, family members' COVID-19 history, family members'  
56  
57 gender and relationship to the survivor in the model predicted family reported outcomes ( $p=0.001$ )  
58  
59  
60

1 while family members' age, survivors' age, duration of COVID-19, pre-existing health condition and  
2  
3  
4 hospital stay were not significant predictors of QoL of family members (Table 7). The multiple  
5  
6 regression analyses confirmed that the QoL of family members/partner was more impacted than  
7  
8 survivors, female family members were affected more than males, family members with a history of  
9  
10 COVID-19 were affected more than those without and partners were affected substantially more than  
11  
12 those of other relationships. In addition, the model predicted that younger survivors' functional  
13  
14 behaviour (both physical and psychosocial) was more impacted by COVID-19.  
15  
16  
17  
18  
19  
20  
21  
22  
23  
24  
25  
26  
27  
28  
29  
30  
31  
32  
33  
34  
35  
36  
37  
38  
39  
40  
41  
42  
43  
44  
45  
46  
47  
48  
49  
50  
51  
52  
53  
54  
55  
56  
57  
58  
59  
60

For peer review only

**Table 5** Correlations\* between the quality of life scores and socio-demographics (n=753)

|                                          | 1        | 2        | 3       | 4       | 5        | 6      | 7      | 8      | 9       | 10 |
|------------------------------------------|----------|----------|---------|---------|----------|--------|--------|--------|---------|----|
| 1 EQ-5D score                            | --       |          |         |         |          |        |        |        |         |    |
| 2 FROM-16 score                          | 0.467**  | --       |         |         |          |        |        |        |         |    |
| 3 EQ-VAS (n=733)                         | -0.591** | -0.346** | --      |         |          |        |        |        |         |    |
| 4 COVID-19 survivor age (years)          | -0.020   | -0.118*  | -0.075  | --      |          |        |        |        |         |    |
| 5 COVID-19 survivor gender               | 0.077*   | -0.024   | -0.102* | 0.064   | --       |        |        |        |         |    |
| 6 Stayed in a hospital for COVID-19      | 0.127*   | 0.073    | -0.097* | 0.143*  | -0.091*  | --     |        |        |         |    |
| 7 Survivor pre-existing health condition | 0.093*   | 0.066    | -0.104* | 0.201** | 0.036    | 0.134* | --     |        |         |    |
| 8 Duration of COVID-19(weeks)            | 0.164*   | 0.029    | -0.218  | 0.158*  | 0.032    | 0.097* | 0.042  | --     |         |    |
| 9 Family member age (years)              | -0.015   | -0.077   | -0.025  | 0.535** | 0.066    | 0.034  | 0.145* | 0.108* | --      |    |
| 10 Family member gender                  | -0.030   | 0.031    | 0.032   | -0.008  | -0.507** | 0.097* | 0.050  | -0.034 | -0.113* | -- |

\*p ≤ 0.05, \*\*p ≤ 0.01, 2-tailed.

**Table 6** Summary of survivors' characteristics predicting EQ-5D scores\* (n=735)

| Predictor                     | Unstandardised coefficients |            | Standardised coefficients | p-value | 95% confidence interval levels for B |             | R <sup>2</sup> | Adjusted R <sup>2</sup> | F-test | p-value |
|-------------------------------|-----------------------------|------------|---------------------------|---------|--------------------------------------|-------------|----------------|-------------------------|--------|---------|
|                               | B                           | Std. Error | Beta                      |         | Lower level                          | Upper Level |                |                         |        |         |
| Survivor Age                  | -0.013                      | 0.006      | -0.076                    | 0.043   | -0.025                               | 0.000       | 0.058          | 0.051                   | 8.907  | 0.0001  |
| Pre-existing health condition | 0.298                       | 0.157      | 0.070                     | 0.059   | -0.011                               | 0.607       |                |                         |        |         |
| Hospital stay for COVID-19    | 0.644                       | 0.181      | 0.131                     | 0.0001  | 0.288                                | 1.001       |                |                         |        |         |
| Duration of COVID-19 (weeks)  | 0.050                       | 0.012      | 0.154                     | 0.0001  | 0.027                                | 0.073       |                |                         |        |         |
| Survivor gender               | -0.471                      | 0.169      | -0.101                    | 0.005   | -0.802                               | -0.139      |                |                         |        |         |

\*Multiple regression; B=the slope of the line between the predictor variable and the dependent variable – the larger the number, the more spread out the points are from the regression line; F-test=degree of the linear regression model fitting the data; R<sup>2</sup> = how well the model fits the data

**Table 7** Summary of family member/partner characteristics predicting FROM-16 scores (n=753)

| <i>Predictor</i>                        | <u>Unstandardised coefficients</u> |                   | <u>Standardised coefficients</u> | <i>p-value</i> | <u>95% confidence interval levels for <i>B</i></u> |                    | <i>R</i> <sup>2</sup> | <i>Adjusted R</i> <sup>2</sup> | <i>F-test</i> | <i>p-val</i> |
|-----------------------------------------|------------------------------------|-------------------|----------------------------------|----------------|----------------------------------------------------|--------------------|-----------------------|--------------------------------|---------------|--------------|
|                                         | <i>B</i>                           | <i>Std. Error</i> | <i>Beta</i>                      |                | <i>Lower Level</i>                                 | <i>Upper Level</i> |                       |                                |               |              |
|                                         |                                    |                   |                                  |                |                                                    |                    | 0.272                 | 0.260                          | 22.506        | 0.0001       |
| EQ-5D score                             | 2.019                              | 0.134             | 0.495                            | 0.001          | 1.757                                              | 2.282              |                       |                                |               |              |
| Age family member                       | -0.044                             | 0.030             | -0.073                           | 0.144          | -0.102                                             | 0.015              |                       |                                |               |              |
| Survivor's duration of COVID-19 (weeks) | -0.064                             | 0.043             | -0.048                           | 0.144          | -0.149                                             | 0.022              |                       |                                |               |              |
| Family member gender                    | -1.357                             | 0.587             | -0.080                           | 0.021          | -2.510                                             | -0.204             |                       |                                |               |              |
| Have you also had COVID-19?             | 1.138                              | 0.524             | 0.071                            | 0.030          | 0.109                                              | 2.167              |                       |                                |               |              |
| Relationship                            |                                    |                   |                                  |                |                                                    |                    |                       |                                |               |              |
| parent                                  | -1.061                             | 1.204             | -0.033                           | 0.379          | -3.426                                             | 1.303              |                       |                                |               |              |
| sons and daughters                      | -3.243                             | 1.108             | -0.123                           | 0.004          | -5.419                                             | -1.067             |                       |                                |               |              |
| brothers and sisters                    | -4.079                             | 1.476             | -0.090                           | 0.006          | -6.977                                             | -1.180             |                       |                                |               |              |
| other                                   | -2.728                             | 1.827             | -0.048                           | 0.136          | -6.314                                             | 0.859              |                       |                                |               |              |
| Survivor age                            | -0.040                             | 0.032             | -0.059                           | 0.201          | -0.103                                             | 0.022              |                       |                                |               |              |
| Survivor pre-existing health condition  | 0.658                              | 0.574             | 0.038                            | 0.252          | -0.468                                             | 1.785              |                       |                                |               |              |
| Survivor hospital stay for COVID-19     | 0.547                              | 0.660             | 0.027                            | 0.408          | -0.749                                             | 1.842              |                       |                                |               |              |

## DISCUSSION

This study fills an important knowledge gap in measuring the impact of COVID-19 on the HRQoL of both the survivors and, importantly, their partners and family members. Health-related quality of life is defined as a person's perception of his/her physical, mental, social and overall well-being (8, 9).

Therefore, its assessment embraces a wider view of the impact of COVID-19.

This study has revealed that the pandemic has a major impact on lives of those who have survived the infection. Pain and discomfort were the most frequently reported problem by COVID-19 survivors, followed by impact on their usual activities, anxiety and depression, affecting females to a greater extent. As the majority of COVID-19 survivors were in paid employment, being physically unwell might have impacted their usual activities or return to work. According to a review on return to work after critical illness (10), globally, a third of previously employed survivors after intensive care stays remained out of work after five years.

Survivors with existing health conditions did not differ significantly from those without such conditions except for mobility. and having an existing health condition was not a significant predictor of impact on the family member/partner's QoL. The survivor's QoL was impacted greatly irrespective of having a pre-existing condition. Hospitalised survivors reported greater impact on mobility, self-care and usual activities compared to those who had not been hospitalised.

The study also revealed a major impact on QoL of the survivors' partners and family members with partners being most impacted. Nearly half of participating partners and family members also reported having had COVID-19. Although there were no significant differences between the family members with COVID-19 and those without across 10 of the 16 QoL items of FROM-16, eating habits, family activities, holiday, sleep, sex-life and work or study were impacted significantly more in those who

1 had had COVID-19. Overall FROM-16 scores were higher for partners and family members with  
2  
3  
4 COVID-19 after adjusting for age, gender, relationship to survivor and the overall survivors' EQ-5D  
5  
6 scores, thus indicating poorer QoL for family members with COVID-19 than for those without.  
7

8  
9 Most partners and family members reported being worried and frustrated, many reported sadness,  
10  
11 inability to talk to someone and difficulty in caring for their loved ones. This is not surprising in a  
12  
13 situation with constant media coverage with emphasis on high daily death rates, the fear of infecting  
14  
15 loved ones, stigma due to community or family members blaming survivors for the spread of the  
16  
17 illness, isolation of loved ones, inability of a family member to provide support, and prolonged  
18  
19 recovery time (11). Such stressors have been implicated in the poor psychological and emotional  
20  
21 health of survivors and their family members (11-14).  
22  
23  
24  
25  
26  
27  
28

29 Family members reported an impact on sexual life as a result of their relative's COVID-19 and this  
30  
31 impact was higher in males and in family members who has also contracted COVID-19. Two-thirds  
32  
33 of family members were either spouses or partners, who could have experienced these difficulties  
34  
35 because of the contagious nature of COVID-19 and because of post survival symptoms. Moreover,  
36  
37 physical illness in partners has a significant impact on marital relationships, contributing to marital  
38  
39 dissatisfaction and likelihood of later divorce (15). Over half of partners and family members reported  
40  
41 impact on holidays and nearly half reported an increase in expenses due to their relative's COVID-19.  
42  
43  
44  
45  
46  
47

48 One of the key findings of this study is the evidence that in survivors in whom the COVID-19 onset  
49  
50 was more than 12 weeks ago, there was still a major persisting impact on QoL across all domains in  
51  
52 both survivors and family members. This provides further evidence of the severe impact of post  
53  
54 acute COVID-19 ("Long COVID") and "Chronic COVID" (16).  
55  
56  
57  
58  
59  
60

1 **Strengths and Limitations.** This study to our knowledge is the first global study to explore the  
2  
3  
4 impact of COVID-19 on both survivors and also their family members/partner. Other strengths  
5  
6 include the large sample size and use of validated tools to assess QoL impact. The study has  
7  
8 demonstrated use of the FROM-16 questionnaire for studying the effects of a pandemic on family  
9  
10 members of an infected person.  
11  
12

13  
14  
15 This study has several limitations. Firstly, it suffers from considerable selection bias as only those  
16  
17 COVID-19 survivors and family members who could access the internet and were active on social  
18  
19 media completed the online questionnaires, limiting generalisability of the study findings. In addition,  
20  
21 the study materials were available only in the English language. Secondly, the study, being cross-  
22  
23 sectional, cannot establish causal relationships among the study variables. However, despite these  
24  
25 limitations, the study has provided a rapid overview of survivors' and their family members' HRQoL  
26  
27 and revealed evidence of the substantial persisting effect on QoL of survivors and a major secondary  
28  
29 impact on the lives of partners and family members. This information can be used to inform  
30  
31 policymakers about the health needs of these individuals and may encourage the development of  
32  
33 tailor-made support services.  
34  
35  
36  
37  
38  
39  
40  
41

#### 42 **Comparison with other studies**

43  
44  
45 Chinese survivors of COVID-19 reported lower HRQoL with significant impact on their physical and  
46  
47 psychological health, one month after recovery (17). Our study has shown a major impact not only on  
48  
49 the HRQoL of survivors of COVID-19 but also on their partners and family members. This is  
50  
51 consistent with the findings of Golics et al. (2, 18) that multiple elements of family members' lives  
52  
53 can be affected by a relative's illness including emotional, financial, family relationships, education  
54  
55 and work, leisure time, and social activities.  
56  
57  
58  
59  
60

1 Our study has shown that most (87%) survivors had COVID-19 for more than 4 weeks, and 64%  
2  
3  
4 more than 12 weeks indicating that survivors continued to remain unwell for long periods of time, due  
5  
6 to post-viral symptoms or 'long COVID'. This is in contrast to a UK COVID-19 symptom study (19),  
7  
8 where only 10% of COVID-19 positive survivors remained unwell at three weeks, and a small  
9  
10 proportion for more than three months. An online survey of British doctors in August 2020 revealed  
11  
12 that many were being treated for long term COVID-19 symptoms such as chronic fatigue, muscle  
13  
14 weakness, loss of sense of smell, and concentration difficulties (20)  
15  
16  
17  
18  
19  
20

21 In our study 69% COVID-19 survivors reported feelings of anxiety and depression, much higher than  
22  
23 the 43.1% reported by Ma Y-F et al. (9) in clinically stable patients with COVID-19. Previous studies  
24  
25 of Severe Acute Respiratory Syndrome (SARS) revealed the persistence of depression in patients up  
26  
27 to 30 months after discharge from hospital (21, 22).  
28  
29  
30  
31

32 Several studies have shown the impact of COVID-19 on sleep patterns of survivors, with an increase  
33  
34 in prevalence of insomnia (23-25). We do not know whether the sleep patterns of survivors in our  
35  
36 study were also impacted, since EQ-5D does not include such an item. However, in our study 69 %  
37  
38 of partners and family members experienced problems with sleep, and 32% reported that their sleep  
39  
40 was impacted "a lot".  
41  
42  
43  
44  
45

46 The total mean domain scores for FROM-16 in this study were 6.12 (Emotional) and 8.88 (Personal  
47  
48 and Social Life) which are higher than the mean domain scores reported by Golics et al. (3)  
49  
50 (Emotional=5.6; Personal and Social Life=6.7) on the impact of patients' chronic disease on family  
51  
52 members across 26 medical specialties. Another study (4) reported the mean domain scores of family  
53  
54 members of patients with cancer as Emotional=4.7 and Personal and Social Life=7.1. In a FROM-16  
55  
56 study on family members of patients with urinary stone disease, family members were not impacted  
57  
58  
59  
60



1 much by their relative's disease, however they reported a slightly greater degree of change in the  
2  
3  
4 'emotional' domain compared with the 'personal and social life' domain (26). This indicates that  
5  
6  
7 family members of COVID-19 survivors suffered more than family members of patients with other  
8  
9  
10 severe chronic diseases.

### 11 12 **Implications for clinicians and policymakers**

13  
14  
15  
16 Our results have shown how the impact of COVID-19 on one family member can have a domino  
17  
18 effect on other family members, especially those close to them such as partner, parents and children. It  
19  
20 is important to understand the needs of these impacted family members and survivors to ensure the  
21  
22 overall wellbeing of the family unit. Based on the findings of this study, policymakers should consider  
23  
24 developing and commissioning the following support services for survivors and family members:  
25  
26  
27

28  
29  
30 *Post COVID-19 clinics:* Survivors reported pain and discomfort even after 12 weeks of COVID-19,  
31  
32 indicating that tailored services to deal with such symptoms are important to help survivors suffering  
33  
34 with long term sequelae. Survivors with post-COVID-19 complications should be heard and treated.

35  
36  
37 Although such clinics have been started in a few countries, there is a considerable need for such  
38  
39  
40 initiatives globally.

41  
42  
43 *Needs-based mental health counselling:* Most family members and survivors reported being depressed  
44  
45 and worried. It is imperative to further develop care services to ensure the mental wellbeing of  
46  
47 survivors and their family members.

48  
49  
50  
51  
52 *Physical activity and rehabilitation services:* Most survivors have reported pain and discomfort and  
53  
54 an inability to do their normal activities. Rehabilitation clinics could provide emotional and physical  
55  
56 support to physically and emotionally drained survivors and their family members to enable their  
57  
58 return to normal routines.  
59  
60

1 *Social support services:* Patients with COVID-19 are from diverse backgrounds and therefore will  
2  
3  
4 benefit from culturally and socially appropriate support. Financial assistance is particularly important  
5  
6  
7 for those who do not have health insurance to cover COVID-19 expenses.  
8  
9

10 *Patient support groups/local support groups for COVID-19 survivors and family members:* Local  
11  
12 support groups could be used in primary care settings and can help by significantly combating  
13  
14  
15 isolation and the disability the study has identified that occurs in COVID-19 survivors and their  
16  
17 family members/partners. This could in turn have health economic benefits by possibly reducing long-  
18  
19 term utilisation of mental health services. Similar approaches have been successful, for example in  
20  
21 supporting people with myalgic encephalitis.  
22  
23  
24  
25

## 26 **Unanswered questions and future research**

27  
28

29 Although this study provided an overview of the impact of COVID-19 on survivors' partners and  
30  
31 family members, it was not designed to identify causal relationship. Future longitudinal studies are  
32  
33 needed to understand the long-term impact of COVID-19. We were unable to measure the impact of  
34  
35 COVID-19 on sleep and sex-life of survivors, future studies should measure such impacts.  
36  
37  
38  
39

## 40 **CONCLUSION**

41  
42  
43

44 Survivors of COVID-19 report a major persisting impact on their QoL with many feeling unwell  
45  
46 beyond 12 weeks. This indicates a demand for a holistic support system that is sensitive to their needs.  
47  
48 Moreover, the QoL of partners and family members is also severely impacted, demonstrating the  
49  
50 importance of investigating disease impact on family QoL. The establishment of services to provide  
51  
52 support to family members of survivors and patients in general is therefore a key consideration in the  
53  
54 future management of COVID-19.  
55  
56  
57  
58  
59  
60

## Acknowledgements

We are grateful to all the COVID-19 survivors and family members/partners who participated in this study. We are grateful to the other 'patient and family research' study partners, Helen Allen and Marie Nixon, for their invaluable contribution.

**Funding:** There was no external funding for this Cardiff University study.

**Competing interests:** All authors have completed the ICMJE uniform disclosure form at [www.icmje.org/coi\\_disclosure.pdf](http://www.icmje.org/coi_disclosure.pdf) and declare: no support from any organisation for the submitted work; RS and SJN declared no competing interest, AYF and SS are joint copyright owners of Family Reported Outcome Measure (FROM-16). JRI reports personal fees from UCB Pharma, personal fees from Novartis, personal fees from Boehringer Ingelheim, personal fees from Kymera Therapeutics, personal fees from Viela Bio, personal fees from UpToDate, personal fees from Editor of British Journal of Dermatology, outside the submitted work; in addition, JRI is co-copyright holder of the Hidradenitis Suppurativa Quality of Life (HiSQOL) score. FMA reports grants and personal fees from Janssen, personal fees from Abbvie, personal fees from Lilly Pharmaceuticals, personal fees from L'Oreal, personal fees from LEO Pharmaceuticals, personal fees from UCB, outside the submitted work.

**Author contributions:** RS primarily carried out the study. wrote first drafts and revised all documentation. SS and AYF equally contributed to the design and supervision of the study and revised all study documentation and the manuscript. FMA, JRI and SJN provided advice during the study and helped revise study documentation. FMA, JRI and SJN reviewed the manuscript. The corresponding author attests that all listed authors meet authorship criteria and that no others meeting the criteria have been omitted.

**Public and Patient Involvement (PPI):** Twenty members of the public, including some work colleagues, participated in the pilot study. Some had experience of having COVID-19 patient in their family. The study sociodemographic questions were extensively modified following the outcome of the pilot study. The 'patients and family member group' consisting of two patients and one family member, were involved as study research partners. This group was involved in reviewing the study protocol, other related documents and the manuscript.

**Ethical approval:** Ethics approval was granted by the Cardiff University School of Medicine Research Ethics Committee (SMREC 20/60).

**Data sharing:** This paper does not report a trial. If requested, we are happy to share our data.

**Transparency statement:** The lead author RS affirms that this manuscript is an honest, accurate, and transparent account of the study being reported; that no important aspects of the study have been omitted; and that any discrepancies from the study as planned (and, if relevant, registered) have been explained.

**Dissemination to participants and related patient and public communities:** The summary of the results will also be disseminated by social media using the same methods as used for recruiting participants and made accessible to public and patients through the Cardiff University FROM-16 website page

## Figure legends

**Figure 1** COVID-19 survivor response to EQ-5D-3L (n=735)

**Figure 2** Partner and family member response to FROM-16 items (n=735)

**Figure 3** Mean scores of individual FROM-16 items for family members diagnosed with COVID-19 and those with no history of COVID-19

**Figure 4** Scatter plot showing positive relationship between COVID-19 survivors' EQ-5D and family members' FROM-16 scores

## References

1. Holmes EA, O'Connor RC, Perry VH, Tracey I, Wessely S, Arseneault L, et al. Multidisciplinary research priorities for the COVID-19 pandemic: a call for action for mental health science. *The Lancet Psychiatry*. 2020;7(6):547-60.
2. Golics CJ, Basra MK, Salek MS, Finlay AY. The impact of patients' chronic disease on family quality of life: an experience from 26 specialties. *Int J Gen Med*. 2013;6:787-98.
3. Golics CJ, Basra MK, Finlay AY, Salek S. The development and validation of the Family Reported Outcome Measure (FROM-16)© to assess the impact of disease on the partner or family member. *Quality of life research : an international journal of quality of life aspects of treatment, care and rehabilitation*. 2014;23(1):317-26.
4. FROM-16. Family Reported Outcome Measure [Online] 2020 [Available from: Available: <https://www.cardiff.ac.uk/medicine/resources/quality-of-life-questionnaires/family-reported-outcome-measure>].
5. Chantarasap P, Johns NP, Pairojkul S, Sookprasert A, Wirasorn K, Cheawchanwattana A, et al. Validation of the Thai version of the family reported outcome measure (FROM-16)© to assess the impact of disease on the partner or family members of patients with cancer. *Health Qual Life Outcomes*. 2019;17(1):32.
6. Jisc. Online Surveys. Jisc, Bristol, UK. 2020 [Available from: <https://www.onlinesurveys.ac.uk/>].
7. EQ-5D-3L. User Guide 2018 [Available from: Available from: <https://euroqol.org/publications/user-guides>].
8. Papakostas GI, Petersen T, Mahal Y, Mischoulon D, Nierenberg AA, Fava M. Quality of life assessments in major depressive disorder: a review of the literature. *Gen Hosp Psychiatry*. 2004;26(1):13-7.
9. Ma Y-F, Li W, Deng H-B, Wang L, Wang Y, Wang P-H, et al. Prevalence of depression and its association with quality of life in clinically stable patients with COVID-19. *J Affect Disord*. 2020;275:145-8.
10. Kamdar BB, Suri R, Suchyta MR, Digrande KF, Sherwood KD, Colantuoni E, et al. Return to work after critical illness: a systematic review and meta-analysis. *Thorax*. 2020;75(1):17-27.

- 1 11. Sahoo S, Mehra A, Suri V, Malhotra P, Yaddanapudi LN, Dutt Puri G, et al. Lived experiences  
2 of the corona survivors (patients admitted in COVID wards): A narrative real-life documented  
3 summaries of internalised guilt, shame, stigma, anger. *Asian J Psychiatr.* 2020;53:102187-  
4
- 5  
6 12. Tansey CM, Louie M, Loeb M, Gold WL, Muller MP, de Jager J, et al. One-Year Outcomes and  
7 Health Care Utilization in Survivors of Severe Acute Respiratory Syndrome. *Archives of Internal  
8 Medicine.* 2007;167(12):1312-20.  
9
- 10  
11 13. Li Q, Guan X, Wu P, Wang X, Zhou L, Tong Y, et al. Early Transmission Dynamics in Wuhan,  
12 China, of Novel Coronavirus–Infected Pneumonia. *New England Journal of Medicine.*  
13 2020;382(13):1199-207.  
14
- 15  
16 14. Xiang Y-T, Yang Y, Li W, Zhang L, Zhang Q, Cheung T, et al. Timely mental health care for the  
17 2019 novel coronavirus outbreak is urgently needed. *The Lancet Psychiatry.* 2020;7(3):228-9.  
18
- 19  
20 15. Daniel K, Wolfe CDA, Busch MA, McKeivitt C. What Are the Social Consequences of Stroke for  
21 Working-Aged Adults? *Stroke.* 2009;40(6):e431-e40.  
22
- 23  
24 16. Greenhalgh T, Knight M, A’Court C, Buxton M, Husain L. Management of post-acute covid-19  
25 in primary care. *BMJ.* 2020;370:m3026.  
26
- 27  
28 17. Chen K-Y, Li T, Gong F-H, Zhang J-S, Li X-K. Predictors of Health-Related Quality of Life and  
29 Influencing Factors for COVID-19 Patients, a Follow-Up at One Month. *Frontiers in Psychiatry.*  
30 2020;11(668).  
31
- 32  
33 18. Golics CJ, Basra MKA, Finlay AY, Salek S. The impact of disease on family members: a critical  
34 aspect of medical care. *Journal of the Royal Society of Medicine.* 2013;106(10):399-407.  
35
- 36  
37 19. COVID Symptom Study. How long does COVID-19 last? Kings College London 2020  
38 [Available from: [https://covid.joinzoe.com/post/covid-long-term?fbclid=IwAR1RxIcmmDL-  
40 EFjh\\_al-](https://covid.joinzoe.com/post/covid-long-term?fbclid=IwAR1RxIcmmDL-<br/>39 EFjh_al-).  
41
- 42  
43 20. Rimmer A. Covid-19: Impact of long term symptoms will be profound, warns BMA. *BMJ.*  
44 2020;370:m3218.  
45
- 46  
47 21. Wu KK, Chan SK, Ma TM. Posttraumatic stress, anxiety, and depression in survivors of severe  
48 acute respiratory syndrome (SARS). *J Trauma Stress.* 2005;18(1):39-42.  
49
- 50  
51 22. Mak IW, Chu CM, Pan PC, Yiu MG, Chan VL. Long-term psychiatric morbidities among SARS  
52 survivors. *Gen Hosp Psychiatry.* 2009;31(4):318-26.  
53
- 54  
55 23. Fu W, Wang C, Zou L, Guo Y, Lu Z, Yan S, et al. Psychological health, sleep quality, and  
56 coping styles to stress facing the COVID-19 in Wuhan, China. *Transl Psychiatry.*  
57 2020;10(1):225-  
58  
59  
60

- 1  
2  
3  
4  
5  
6  
7  
8  
9  
10  
11  
12  
13  
14  
15  
16  
17  
18  
19  
20  
21  
22  
23  
24  
25  
26  
27  
28  
29  
30  
31  
32  
33  
34  
35  
36  
37  
38  
39  
40  
41  
42  
43  
44  
45  
46  
47  
48  
49  
50  
51  
52  
53  
54  
55  
56  
57  
58  
59  
60
24. Marelli S, Castelnuovo A, Somma A, Castronovo V, Mombelli S, Bottoni D, et al. Impact of COVID-19 lockdown on sleep quality in university students and administration staff. *Journal of Neurology*. 2020.
  25. Gualano MR, Lo Moro G, Voglino G, Bert F, Siliquini R. Effects of Covid-19 Lockdown on Mental Health and Sleep Disturbances in Italy. *Int J Environ Res Public Health*. 2020;17(13).
  26. Raja A, Wood F, Joshi HB. The impact of urinary stone disease and their treatment on patients' quality of life: a qualitative study. *Urolithiasis*. 2020;48(3):227-34.

For peer review only

Figure 1 COVID-19 survivor response to EQ-5D-3L (n=735)

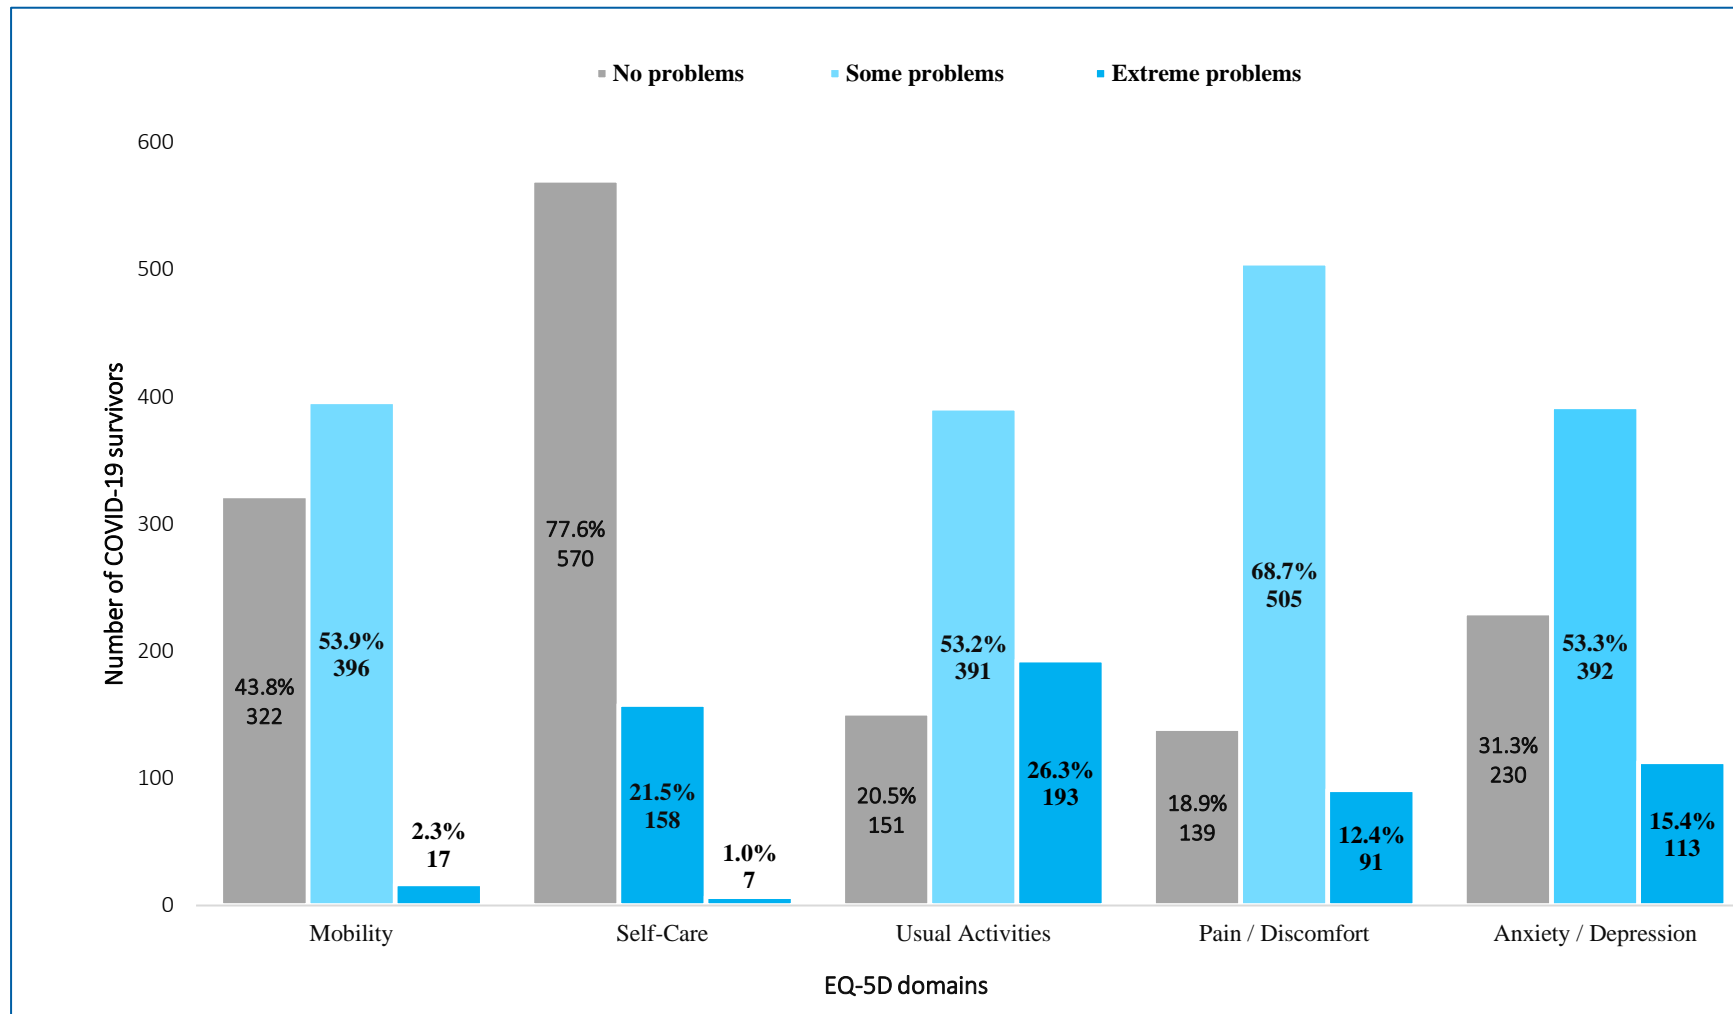

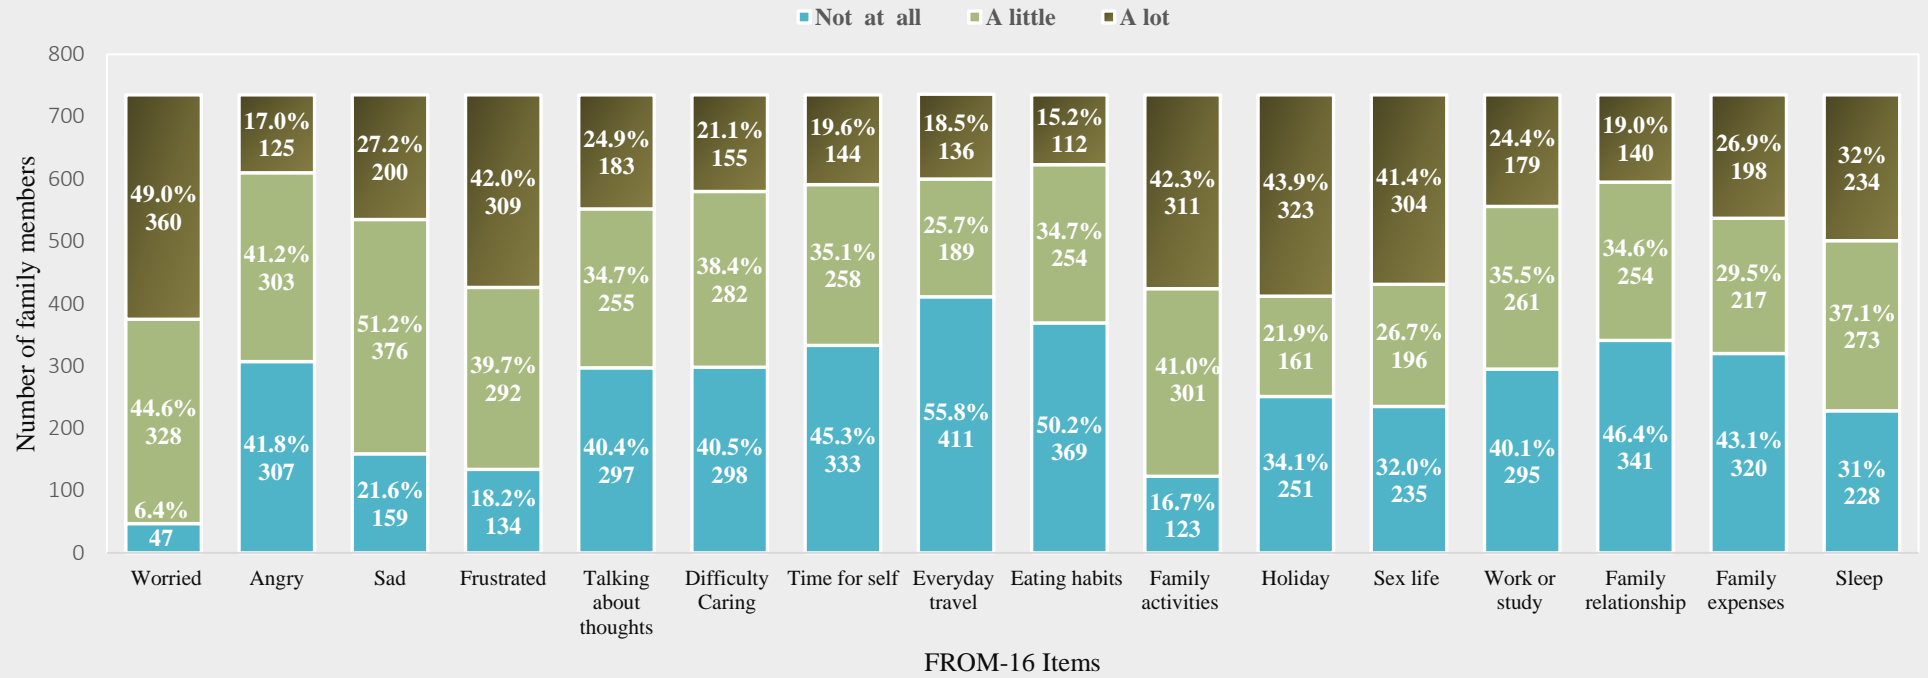



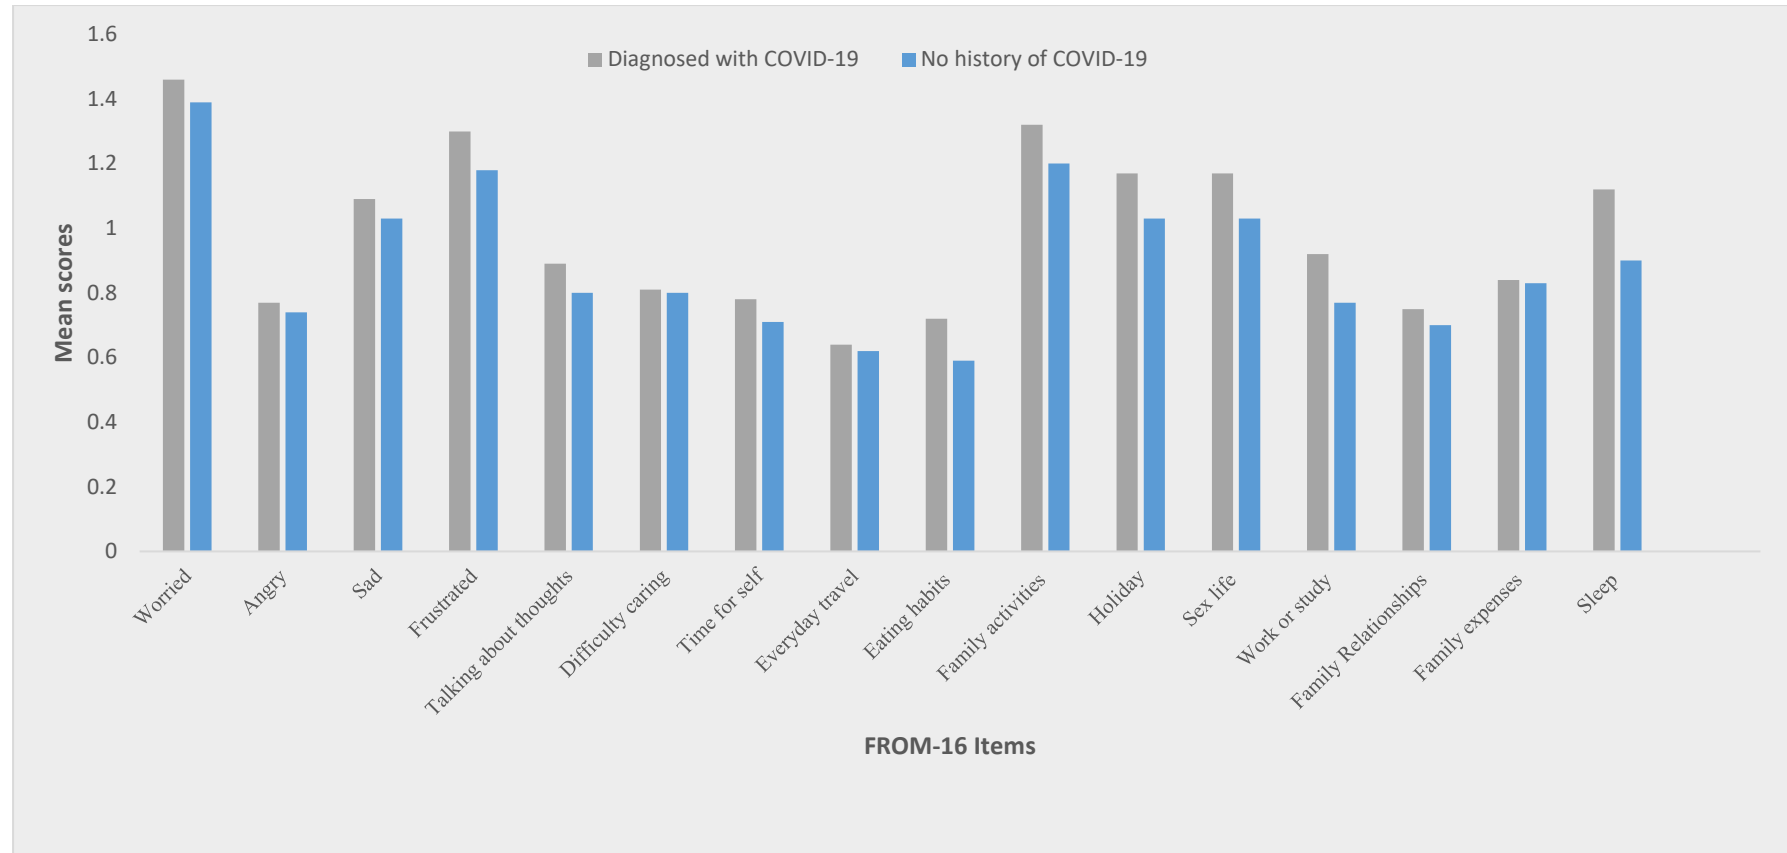

1  
2  
3  
4  
5  
6  
7  
8  
9  
10  
11  
12  
13  
14  
15  
16  
17  
18  
19  
20  
21  
22  
23  
24  
25  
26  
27  
28  
29  
30  
31  
32  
33  
34  
35  
36  
37  
38  
39  
40  
41  
42  
43  
44  
45  
46

For peer review only

1  
2  
3  
4  
5  
6  
7  
8  
9  
10  
11  
12  
13  
14  
15  
16  
17  
18  
19  
20  
21  
22  
23  
24  
25  
26  
27  
28  
29  
30  
31  
32  
33  
34  
35  
36  
37  
38  
39  
40  
41  
42  
43  
44  
45  
46  
47  
48  
49  
50  
51  
52  
53  
54  
55  
56  
57  
58  
59  
60

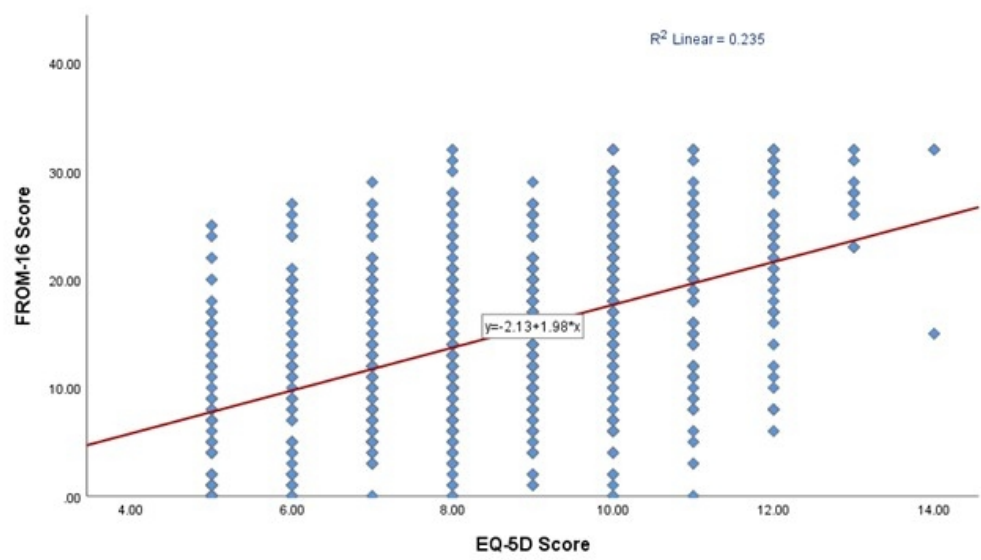

Figure 3 Mean scores of individual FROM-16 items for family members diagnosed with COVID-19 and those with no history of COVID-19

168x99mm (96 x 96 DPI)

## Lay summary

### **Impact of COVID-19 on Quality of Life of Survivors and their Partners and Family members**

Much research has been published about COVID-19, but there is very little information concerning the impact on the lives of partners and family members of those infected with COVID-19.

We asked people who had had COVID-19 and their partners and family members to complete an online survey using social media, such as Facebook and Twitter, from June to August 2020 to understand the impact of COVID-19. 735 survivors, their partners and family members from across Europe, North America and rest of the world took part. We found that the quality of life of both survivors, their partners and family members were greatly affected by COVID-19.

Most survivors of COVID-19 who took part in the survey continued to experience a major impact on their quality of life beyond four weeks of having had COVID-19 (637/735). Some of these people may have had the syndrome now known as 'Long COVID'. Most COVID-19 survivors reported pain and discomfort, inability to do their usual activities, anxiety and depression. Survivors who had been hospitalised for COVID-19 reported a greater impact on quality of life while those who had other health conditions such as diabetes, heart disease or breathing problems reported experiencing difficulties in walking and moving around.

Partners and family members of COVID-19 survivors were also severely affected. Most partners and family members felt worried and frustrated, experienced a huge impact on their family activities, with many having problems with their sleep and sex-life. Nearly half of the partners and family members who responded had also developed COVID-19. Although, there was no significant differences between the family members with COVID-19 and those without it across 10 of the 16 Quality of life areas, eating habits, family activities, holiday, sleep, sex-life, work and study were more impacted in partner and family member with COVID-19.

These findings suggest the need for a holistic support system sensitive to the needs of COVID-19 survivors and their family members. The major continuing impact on the quality of life of survivors of COVID-19 and their family members needs to be understood by health care workers and services developed to help people to get back to their pre-COVID-19 lives.

| Section/Topic             | Item # | Recommendation                                                                                                                                                                       | Page No  | Relevant text from the manuscript                  |
|---------------------------|--------|--------------------------------------------------------------------------------------------------------------------------------------------------------------------------------------|----------|----------------------------------------------------|
| <b>Title and abstract</b> | 1      | (a) Indicate the study's design with a commonly used term in the title or the abstract                                                                                               | 2        | Abstract                                           |
|                           |        | (b) Provide in the abstract an informative and balanced summary of what was done and what was found                                                                                  | 2        | Abstract page 1                                    |
| <b>Introduction</b>       |        |                                                                                                                                                                                      |          |                                                    |
| Background/rationale      | 2      | Explain the scientific background and rationale for the investigation being reported                                                                                                 | 3        | Introduction- paragraph 1, 2                       |
| Objectives                | 3      | State specific objectives, including any prespecified hypotheses                                                                                                                     | 4        | Introduction- paragraph 3                          |
| <b>Methods</b>            |        |                                                                                                                                                                                      |          |                                                    |
| Study design              | 4      | Present key elements of study design early in the paper                                                                                                                              | 4, 5     | Methods                                            |
| Setting                   | 5      | Describe the setting, locations, and relevant dates, including periods of recruitment, exposure, follow-up, and data collection                                                      | 4-5      | Methods-setting/ participants / procedure          |
| Participants              | 6      | (a) Give the eligibility criteria, and the sources and methods of selection of participants                                                                                          | 5        | Method-procedure                                   |
| Variables                 | 7      | Clearly define all outcomes, exposures, predictors, potential confounders, and effect modifiers. Give diagnostic criteria, if applicable                                             | 6        | Methods -outcome /exposure/Covariates/missing data |
| Data sources/ measurement | 8*     | For each variable of interest, give sources of data and details of methods of assessment (measurement). Describe comparability of assessment methods if there is more than one group | 6        | Methods-Measurements tools                         |
| Bias                      | 9      | Describe any efforts to address potential sources of bias                                                                                                                            | 7, 14-15 | Methods and Regression                             |
| Study size                | 10     | Explain how the study size was arrived at                                                                                                                                            |          | Study Size = Exploratory                           |
| Quantitative variables    | 11     | Explain how quantitative variables were handled in the analyses. If applicable, describe which groupings were chosen and why                                                         | 7        | Statistical analysis                               |
| Statistical methods       | 12     | (a) Describe all statistical methods, including those used to control for confounding                                                                                                | 7        |                                                    |
|                           |        | (b) Describe any methods used to examine subgroups and interactions                                                                                                                  | 7-17     | Statistical analysis and Tables 1-7                |
|                           |        | (c) Explain how missing data were addressed                                                                                                                                          | 7        | There were no missing data                         |
|                           |        | (d) If applicable, describe analytical methods taking account of sampling strategy                                                                                                   |          | Exploratory                                        |
|                           |        | (e) Describe any sensitivity analyses                                                                                                                                                |          | Not applicable                                     |

|    |                   |     |                                                                                                                                                                                                                |       |                                                                                                                                                                                                                                                        |
|----|-------------------|-----|----------------------------------------------------------------------------------------------------------------------------------------------------------------------------------------------------------------|-------|--------------------------------------------------------------------------------------------------------------------------------------------------------------------------------------------------------------------------------------------------------|
| 1  |                   |     |                                                                                                                                                                                                                |       |                                                                                                                                                                                                                                                        |
| 2  | <b>Results</b>    |     |                                                                                                                                                                                                                |       |                                                                                                                                                                                                                                                        |
| 3  | Participants      | 13* | (a) Report numbers of individuals at each stage of study—eg numbers potentially eligible, examined for eligibility, confirmed eligible, included in the study, completing follow-up, and analysed              | 7     | Results section                                                                                                                                                                                                                                        |
| 4  |                   |     | (b) Give reasons for non-participation at each stage                                                                                                                                                           |       | Not applicable                                                                                                                                                                                                                                         |
| 5  |                   |     | (c) Consider use of a flow diagram                                                                                                                                                                             |       | Not applicable                                                                                                                                                                                                                                         |
| 6  | Descriptive data  | 14* | (a) Give characteristics of study participants (eg demographic, clinical, social) and information on exposures and potential confounders                                                                       | 7-8   | Table 1 descriptive analysis                                                                                                                                                                                                                           |
| 7  |                   |     | (b) Indicate number of participants with missing data for each variable of interest                                                                                                                            |       | NA (no missing data)                                                                                                                                                                                                                                   |
| 8  | Outcome data      | 15* | Report numbers of outcome events or summary measures                                                                                                                                                           | 7     | Results and Tables/Figures                                                                                                                                                                                                                             |
| 9  | Main results      | 16  | (a) Give unadjusted estimates and, if applicable, confounder-adjusted estimates and their precision (e.g., 95% confidence interval). Make clear which confounders were adjusted for and why they were included | 7-17  | Results section-Table 3, 4 and 5. Multiple regression Tables 6 and 7                                                                                                                                                                                   |
| 10 |                   |     | (b) Report category boundaries when continuous variables were categorised                                                                                                                                      |       | Not Applicable                                                                                                                                                                                                                                         |
| 11 |                   |     | (c) If relevant, consider translating estimates of relative risk into absolute risk for a meaningful time period                                                                                               |       | Not Applicable                                                                                                                                                                                                                                         |
| 12 | Other analyses    | 17  | Report other analyses done—eg analyses of subgroups and interactions, and sensitivity analyses                                                                                                                 | 10-13 | Results – Sub group analysis- male /female; hospitalise for COVID-19/not hospitalised ; Pre-existing health condition / No pre-existing health condition; partner and Family member 's with COVID / Partner and family not having COVID Tables 3 and 4 |
| 13 |                   |     |                                                                                                                                                                                                                |       |                                                                                                                                                                                                                                                        |
| 14 | <b>Discussion</b> |     |                                                                                                                                                                                                                |       |                                                                                                                                                                                                                                                        |
| 15 | Key results       | 18  | Summarise key results with reference to study objectives                                                                                                                                                       | 18-19 | 16-17                                                                                                                                                                                                                                                  |
| 16 | Limitations       | 19  | Discuss limitations of the study, taking into account sources of potential bias or imprecision. Discuss both direction and magnitude of any potential bias                                                     | 20    | Strengths and Limitation section                                                                                                                                                                                                                       |
| 17 | Interpretation    | 20  | Give a cautious overall interpretation of results considering objectives, limitations, multiplicity of analyses, results from similar studies, and other relevant evidence                                     | 20-21 | Strengths and limitation / comparison with other studies                                                                                                                                                                                               |
| 18 |                   |     |                                                                                                                                                                                                                |       |                                                                                                                                                                                                                                                        |
| 19 |                   |     |                                                                                                                                                                                                                |       |                                                                                                                                                                                                                                                        |
| 20 |                   |     |                                                                                                                                                                                                                |       |                                                                                                                                                                                                                                                        |
| 21 |                   |     |                                                                                                                                                                                                                |       |                                                                                                                                                                                                                                                        |
| 22 |                   |     |                                                                                                                                                                                                                |       |                                                                                                                                                                                                                                                        |
| 23 |                   |     |                                                                                                                                                                                                                |       |                                                                                                                                                                                                                                                        |
| 24 |                   |     |                                                                                                                                                                                                                |       |                                                                                                                                                                                                                                                        |
| 25 |                   |     |                                                                                                                                                                                                                |       |                                                                                                                                                                                                                                                        |
| 26 |                   |     |                                                                                                                                                                                                                |       |                                                                                                                                                                                                                                                        |
| 27 |                   |     |                                                                                                                                                                                                                |       |                                                                                                                                                                                                                                                        |
| 28 |                   |     |                                                                                                                                                                                                                |       |                                                                                                                                                                                                                                                        |
| 29 |                   |     |                                                                                                                                                                                                                |       |                                                                                                                                                                                                                                                        |
| 30 |                   |     |                                                                                                                                                                                                                |       |                                                                                                                                                                                                                                                        |
| 31 |                   |     |                                                                                                                                                                                                                |       |                                                                                                                                                                                                                                                        |
| 32 |                   |     |                                                                                                                                                                                                                |       |                                                                                                                                                                                                                                                        |
| 33 |                   |     |                                                                                                                                                                                                                |       |                                                                                                                                                                                                                                                        |
| 34 |                   |     |                                                                                                                                                                                                                |       |                                                                                                                                                                                                                                                        |
| 35 |                   |     |                                                                                                                                                                                                                |       |                                                                                                                                                                                                                                                        |
| 36 |                   |     |                                                                                                                                                                                                                |       |                                                                                                                                                                                                                                                        |
| 37 |                   |     |                                                                                                                                                                                                                |       |                                                                                                                                                                                                                                                        |
| 38 |                   |     |                                                                                                                                                                                                                |       |                                                                                                                                                                                                                                                        |
| 39 |                   |     |                                                                                                                                                                                                                |       |                                                                                                                                                                                                                                                        |
| 40 |                   |     |                                                                                                                                                                                                                |       |                                                                                                                                                                                                                                                        |
| 41 |                   |     |                                                                                                                                                                                                                |       |                                                                                                                                                                                                                                                        |
| 42 |                   |     |                                                                                                                                                                                                                |       |                                                                                                                                                                                                                                                        |
| 43 |                   |     |                                                                                                                                                                                                                |       |                                                                                                                                                                                                                                                        |
| 44 |                   |     |                                                                                                                                                                                                                |       |                                                                                                                                                                                                                                                        |
| 45 |                   |     |                                                                                                                                                                                                                |       |                                                                                                                                                                                                                                                        |
| 46 |                   |     |                                                                                                                                                                                                                |       |                                                                                                                                                                                                                                                        |

1  
2  
3  
4  
5  
6  
7  
8  
9  
10  
11  
12  
13  
14  
15  
16  
17  
18  
19  
20  
21  
22  
23  
24  
25  
26  
27  
28  
29  
30  
31  
32  
33  
34  
35  
36  
37  
38  
39  
40  
41  
42  
43  
44  
45  
46

|                          |    |                                                                                                                                                                |    |                                   |
|--------------------------|----|----------------------------------------------------------------------------------------------------------------------------------------------------------------|----|-----------------------------------|
| Generalisability         | 21 | Discuss the generalisability (external validity) of the study results                                                                                          | 20 | Strengths and limitations section |
| <b>Other information</b> |    |                                                                                                                                                                |    |                                   |
| Funding                  | 22 | Give the source of funding and the role of the funders for the present study and, if applicable, for the original study on which the present article is based. | 24 | Funding section                   |

**STROBE 2007 (v4) Statement—Checklist of items that should be included in reports of *cross-sectional studies***

\*Give information separately for cases and controls in case-control studies and, if applicable, for exposed and unexposed groups in cohort and cross-sectional studies.

**Note:** An Explanation and Elaboration article discusses each checklist item and gives methodological background and published examples of transparent reporting. The STROBE checklist is best used in conjunction with this article (freely available on the Web sites of PLoS Medicine at <http://www.plosmedicine.org/>, Annals of Internal Medicine at <http://www.annals.org/>, and Epidemiology at <http://www.epidem.com/>). Information on the STROBE Initiative is available at [www.strobe-statement.org](http://www.strobe-statement.org).

# BMJ Open

## Measuring the impact of COVID-19 on the quality of life of the survivors, partners and family members: A cross-sectional international online survey

|                                 |                                                                                                                                                                                                                                                                                                                                                                               |
|---------------------------------|-------------------------------------------------------------------------------------------------------------------------------------------------------------------------------------------------------------------------------------------------------------------------------------------------------------------------------------------------------------------------------|
| Journal:                        | <i>BMJ Open</i>                                                                                                                                                                                                                                                                                                                                                               |
| Manuscript ID                   | bmjopen-2020-047680.R1                                                                                                                                                                                                                                                                                                                                                        |
| Article Type:                   | Original research                                                                                                                                                                                                                                                                                                                                                             |
| Date Submitted by the Author:   | 15-Mar-2021                                                                                                                                                                                                                                                                                                                                                                   |
| Complete List of Authors:       | Shah, Rubina ; Cardiff University School of Medicine<br>Ali, Faraz ; Cardiff University,<br>Nixon, Stuart; MS society Cardiff UK<br>Ingram, John; Cardiff University School of Medicine<br>Salek, Sam; University of Hertfordshire<br>Finlay, Andrew ; Cardiff University School of Medicine, Department of Dermatology and Wound Healing, Division of Infection and Immunity |
| <b>Primary Subject Heading</b>: | Public health                                                                                                                                                                                                                                                                                                                                                                 |
| Secondary Subject Heading:      | Infectious diseases                                                                                                                                                                                                                                                                                                                                                           |
| Keywords:                       | COVID-19, Public health < INFECTIOUS DISEASES, Infection control < INFECTIOUS DISEASES                                                                                                                                                                                                                                                                                        |
|                                 |                                                                                                                                                                                                                                                                                                                                                                               |

SCHOLARONE™  
Manuscripts



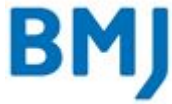

I, the Submitting Author has the right to grant and does grant on behalf of all authors of the Work (as defined in the below author licence), an exclusive licence and/or a non-exclusive licence for contributions from authors who are: i) UK Crown employees; ii) where BMJ has agreed a CC-BY licence shall apply, and/or iii) in accordance with the terms applicable for US Federal Government officers or employees acting as part of their official duties; on a worldwide, perpetual, irrevocable, royalty-free basis to BMJ Publishing Group Ltd ("BMJ") its licensees and where the relevant Journal is co-owned by BMJ to the co-owners of the Journal, to publish the Work in this journal and any other BMJ products and to exploit all rights, as set out in our [licence](#).

The Submitting Author accepts and understands that any supply made under these terms is made by BMJ to the Submitting Author unless you are acting as an employee on behalf of your employer or a postgraduate student of an affiliated institution which is paying any applicable article publishing charge ("APC") for Open Access articles. Where the Submitting Author wishes to make the Work available on an Open Access basis (and intends to pay the relevant APC), the terms of reuse of such Open Access shall be governed by a Creative Commons licence – details of these licences and which [Creative Commons](#) licence will apply to this Work are set out in our licence referred to above.

Other than as permitted in any relevant BMJ Author's Self Archiving Policies, I confirm this Work has not been accepted for publication elsewhere, is not being considered for publication elsewhere and does not duplicate material already published. I confirm all authors consent to publication of this Work and authorise the granting of this licence.

1  
2  
3 **Measuring the impact of COVID-19 on the quality of life of the survivors, partners and**  
4 **family members: A cross-sectional international online survey**  
5

6 Rubina M Shah<sup>1</sup>, Faraz M Ali<sup>1</sup>, Stuart Nixon<sup>2</sup>, John R Ingram<sup>1</sup>, Sam S Salek<sup>3,4</sup>, Andrew Y Finlay<sup>1</sup>  
7  
8

9 <sup>1</sup>Division of Infection and Immunity, Cardiff University, School of Medicine, Cardiff, UK,

10 <sup>2</sup>Ambassador, Multiple Sclerosis Society, Cardiff, UK.

11 <sup>3</sup>School of Life & Medical Sciences, University of Hertfordshire, Hatfield, UK, Institute of  
12 Medicines Development, Cardiff, UK.  
13  
14

15  
16 **Corresponding Author**

17 Shah RM<sup>1</sup> email: [ShahR45@cardiff.ac.uk](mailto:ShahR45@cardiff.ac.uk)

18 **ORCID:** 0000-0001-8158-712X  
19

20  
21 **Co-authors**

22 Ali FM<sup>1</sup> email: [alifm@cardiff.ac.uk](mailto:alifm@cardiff.ac.uk)

23 **ORCID:** 0000-0002-4184-2023  
24

25 Nixon SJ<sup>2</sup> email: [stuart.nixon@mssociety.org.uk](mailto:stuart.nixon@mssociety.org.uk)  
26

27 Ingram JR<sup>1</sup> email: [ingramjr@cardiff.ac.uk](mailto:ingramjr@cardiff.ac.uk)

28 **ORCID:** 0000-0002-5257-1142  
29

30 Salek MS<sup>3</sup> email: [m.s.salek@herts.ac.uk](mailto:m.s.salek@herts.ac.uk)

31 **ORCID:** 0000 0002 4612 5699  
32

33 Finlay AY<sup>1</sup> email: [finlayay@cardiff.ac.uk](mailto:finlayay@cardiff.ac.uk)

34 **ORCID:** 0000 0003 2143 1646  
35  
36  
37  
38  
39  
40  
41  
42  
43  
44  
45  
46  
47  
48  
49  
50  
51  
52  
53  
54  
55  
56  
57  
58  
59  
60

**Word count: 4,835**

## ABSTRACT

### Objective:

This study aimed to measure the impact of COVID-19 on the quality of life (QoL) of survivors and their partners and family members.

### Design and Setting:

A prospective cross-sectional global online survey using social media.

### Participants:

COVID-19 patients and partners or family members (age  $\geq 18$  years).

### Intervention:

Online survey from June to August 2020.

### Main outcome measure:

The EQ-5D-3L to measure the QoL of survivors of COVID-19, and the Family Reported Outcome Measure (FROM-16) to assess the impact on their partner/family member's QoL.

### Results:

The survey was completed by 735 COVID-19 survivors (mean age=48 years; females=563) at a mean of 12.8 weeks after diagnosis and by 571 partners and 164 family members (n=735; mean age=47 years; females=246) from Europe (50.6%), North America (38.5%) and rest of the world (10.9%). The EQ-5D mean score for COVID-19 survivors was 8.65 (SD=1.9, median=9; range=6-14). 81.1% (596/735) reported pain and discomfort, 79.5% (584/735) problems with usual activities, 68.7% (505/735) anxiety and depression and 56.2% (413/735) problems with mobility. Hospitalised survivors (20%, n=148) and survivors with existing health conditions (30%, n=227) reported significantly more problems with mobility and usual activities ( $p < 0.05$ ), with hospitalised also experiencing more impact on self-care ( $p \leq 0.001$ ).

Among 735 partners and family members, the mean FROM-16 score (maximum score = highest impact = 32) was 15 (median=15, range=0-32). 93.6% (688/735) reported being worried, 81.7% (601/735) frustrated, 78.4% (676/735) sad, 83.3% (612/735) reported impact on their family activities, 68.9% (507/735) on sleep and 68.1% (500/735) on their sex life.

### Conclusion:

COVID-19 survivors reported a major persisting impact on their physical and psychosocial health. The lives of their partners and other family members were also severely affected. There is a need for a holistic support system sensitive to the needs of COVID-19 survivors and their family members who experience a major "secondary burden".

### Keywords

COVID-19; Long COVID, family impact; partner impact; patient impact; EQ-5D; quality of life; FROM-16; Family- Reported Outcome Measure.

### Strengths and Limitations of this study

- This study provides evidence of the impact on quality of life (QoL) of 'Long COVID' in survivors of COVID-19.
- This study fills an important knowledge gap in measuring the impact of survivors' COVID-19 on the QoL of partners and other family members.
- Large sample size, heterogenous population and use of validated tools to assess QoL impact
- The study was open to COVID survivors and their family members internationally, but only those active on social media who could read and understand English completed the survey.
- Causal relationships cannot be established among the study variables as the study was cross-sectional.

## INTRODUCTION

The COVID-19 pandemic is causing profound changes across the world, but there is little information on its physical and psychosocial impact on survivors and their families. Despite the need (1) for information on the lived experience of infected individuals and their family members, there are only sparse data available.

It is important to ascertain COVID-19's immediate and persisting (Long COVID) impact on those affected and on their families in order to aid healthcare workers and government agencies to better support them. The understanding of how a person's health condition impacts the quality of life (QoL) of other family members has increased over the last decade (2).

The aim of this study was to assess the impact of COVID-19 on survivors and their family members based on their lived experience of COVID-19 using validated QoL instruments administered using online social media platforms.

## **METHODS**

### **Settings and participants**

This was a prospective cross-sectional global online survey, using an anonymous online questionnaire. The survey was carried out using <https://www.onlinesurveys.ac.uk/> on a Jisc platform (3). The survey was distributed through social media platforms including Facebook, Twitter, LinkedIn, WhatsApp and Reddit.

### **Procedure**

Ethics approval was granted by the Cardiff University School of Medicine Research Ethics Committee (SMREC 20/60). Study participants were provided with information about the study via a link in the survey to a "Participant Information Sheet" where they were informed that participation was voluntary and their data would remain anonymous. Those who decided to take part gave informed consent at the beginning of the survey. Data collection took place from 30th May to 30th August 2020.

The study was only open to individuals who were diagnosed with COVID-19 and their family member or partner, adults aged 18 years or above who could read and understand English, and who were able to give written consent and complete the questionnaire using an electronic device. Participants were excluded if they had not had COVID-19 or if they were less than 18 years of age.

### **Survey development**

The survey included two QoL questionnaires: EuroQol group 5 Dimensions 3 level (EQ-5D-3L) and Family Reported Outcome Measure (FROM-16). There were additional socio-demographic questions such as responder's age, gender and country of residence (Table 1). A pre-test draft survey was piloted during May 2020 in 20 individuals without COVID-19 across several countries including the UK, India, and the UAE. Views were also sought from the study research partners, a patient and two family members. The survey questions were revised based on the collective feedback.

### **Patient and public involvement**

1 Two patients and one family member were involved as integral study research partners, one of whom  
2  
3 (SJM) is a co-author. They were involved in reviewing the study protocol, drafting the survey,  
4  
5 reviewing the manuscript and providing suggestions from the patient and family perspective.  
6  
7

### 8 **Survey structure**

9  
10 The survey had two sections. Section one was completed by the COVID-19 survivor. Each survivor  
11  
12 provided basic demographic details and provided EQ-5D-3L responses. Section two was completed  
13  
14 by the partner or a family member of the survivor who provided basic demographic details and  
15  
16 completed FROM-16. The survey did not specify whether this should be someone the patient lives  
17  
18 with or whether it could be any close relation; however, the family member of the COVID-19  
19  
20 survivor was asked to specify their relationship to the patient.  
21  
22

### 23 **Measurement tools**

24  
25 The EQ-5D-3 L is a self-reported generic health-related QoL (HRQoL) instrument that specifically  
26  
27 addresses health status (4). It consists of five questions on mobility, self-care, usual activities, pain  
28  
29 and discomfort, and anxiety and depression with 3-point response categories (1= no problems, 2=  
30  
31 some problems and 3= serious or extreme problems). The EQ-VAS component of EQ-5D-3L asks  
32  
33 respondents to rate their overall health status from 0 (worst imaginable health) to 100 (best imaginable  
34  
35 health). In this study, for simplicity throughout this manuscript, we refer to EQ-5D-3L as  
36  
37 'EQ-5D'.  
38  
39  
40  
41  
42

43 The FROM-16 measures the impact of a patient's disease on the QoL of a family member or partner  
44  
45 of a patient (5). The FROM-16 comprises 16 items with 3-point response options for each: not at all  
46  
47 (scoring 0), a little (1) and a lot (2), with a total score range of 0 - 32. The higher the score, the greater  
48  
49 the negative impact on the family member's QoL. The 16 items are divided into two domains:  
50  
51 Emotional (six items, maximum score 12) and Personal and Social Life (ten items, maximum score  
52  
53 20). The FROM-16 has proven psychometric properties, a rapid completion time of two minutes (5)  
54  
55 and translations are available in several languages (6). A generic measure, the FROM-16 has been  
56  
57 validated across all areas of medicine (5-7) and is therefore suitable for measuring the impact of  
58  
59  
60

1 COVID-19 on the partner and family members of those affected. As it is a generic measure, data  
2 generated can be compared with data from other medical conditions.  
3  
4

5  
6 **Outcome:** The impact of COVID-19 on the quality of life of survivors and their partners and family  
7 members.  
8  
9

10  
11 **Exposure:** COVID-19 infection of the participant or of the family member.  
12

13  
14 **Covariates:** The covariates included hospital stay due to COVID-19 infection, existing health  
15 condition of survivors, weeks since first had COVID-19, partners and family members diagnosed with  
16 COVID-19, family members' relationship to survivors, country of residence, age and sex of family  
17 members and survivors. All the covariates, including hospitalisation, existing conditions and weeks  
18 since first had COVID-19 were based on self-report.  
19  
20  
21  
22  
23

24  
25 **Missing data:** There were no missing data, but two responses were ambiguous for one of the  
26 variables (EQ-VAS) and were excluded from the analysis.  
27  
28

### 29 30 **Statistical analysis**

31  
32 Descriptive statistics (i.e. mean, standard deviation, median, inter-quartile range) were performed for  
33 all variables. The Shapiro–Wilk test was used to examine normal distribution of continuous variables.  
34 The required assumptions for normal distribution were not met. Consequently, data analysis employed  
35 non-parametric statistical method. Both the EQ-5D-3L and the FROM-16 scores were treated in the  
36 analysis as dependent variables. The EQ-VAS score was calculated separately since it represents a  
37 different construct. To determine differences between groups defined by each outcome, chi-square  
38 tests (when appropriate, Fisher's exact tests) and Mann-Whitney U tests were computed. These  
39 bivariate comparisons were based on COVID-19 survivor's characteristics (gender, existing health  
40 condition, and hospitalisation) and family member characteristics (gender and whether diagnosed with  
41 COVID-19). Spearman's rank correlation coefficient and multiple regression analysis were conducted  
42 to understand the effect of independent variables (i.e. predictors: survivor age, existing health  
43 condition, hospital stay for COVID-19, weeks since first had COVID-19, survivor gender) on the EQ-  
44 5D outcomes. Similarly, these analyses were conducted to understand the effect of independent  
45 variables (EQ-5D score, age family member, weeks since first had COVID-19, family member  
46  
47  
48  
49  
50  
51  
52  
53  
54  
55  
56  
57  
58  
59  
60

gender, whether family member also had COVID-19, relationship to survivor, survivor age, survivor existing health condition, survivor hospital stay for COVID-19) on the FROM-16 outcomes.

Statistical Product and Service Solutions SPSS® (version 25) was used and the probability of type I error was set at  $p < 0.05$ .

## RESULTS

### Sociodemographic characteristics of the study participants

A total of 1,254 respondents consented to participate in the survey: 765 completed both sections.

Thirty responses were excluded as the respondents were below the age of 18 years. The final analysis included 735 COVID-19 survivors and their family members/partner from Europe (50.6%), North America (38.5%) and the rest of the world (10.9%) (Table 1).

**Table 1** Sociodemographic characteristics of the study participants

| Variables                         | Categories                         | N (%) or N(SD) |
|-----------------------------------|------------------------------------|----------------|
| <b>COVID-19 Survivors (n=735)</b> |                                    |                |
| Gender                            | Male                               | 172 (23.4%)    |
|                                   | Female                             | 563 (76.6%)    |
| Age (years)                       | Mean (SD)                          | 47.77 (11.656) |
|                                   | Median                             | 48.00          |
|                                   | Range                              | 19-85          |
|                                   | Range (IQR)                        | 19-85 (16)     |
| Weeks since first had COVID-19    | Mean (SD)                          | 12.76 (6.104)  |
|                                   | Median                             | 13.00          |
|                                   | Range                              | 1-36           |
|                                   | Range (IQR)                        | 1-36 (8)       |
|                                   | ≥4 weeks                           | 98 (13.3%)     |
|                                   | 5-11 weeks                         | 170 (23.1%)    |
|                                   | ≥12 weeks                          | 467 (63.5%)    |
| Occupation                        | Unemployed                         | 19 (2.6%)      |
|                                   | In paid work                       | 538 (73.2%)    |
|                                   | In education or training           | 26 (3.5%)      |
|                                   | In unpaid work                     | 7 (1%)         |
|                                   | Work in the home/manage the family | 60 (8.2%)      |
|                                   | Retired                            | 66 (9%)        |



|    |                               |                          |                |
|----|-------------------------------|--------------------------|----------------|
| 1  |                               | Rather not say           | 19 (2.6%)      |
| 2  |                               |                          |                |
| 3  |                               |                          |                |
| 4  | Existing health               | No                       | 508 (69.1%)    |
| 5  | conditions                    | Yes                      | 227 (30.9%)    |
| 6  |                               |                          |                |
| 7  | Hospitalised for COVID-19     | No                       | 587 (79.9%)    |
| 8  |                               | Yes                      | 148 (20.1%)    |
| 9  |                               |                          |                |
| 10 | Regions                       | Europe                   | 372 (50.6%)    |
| 11 |                               | North America            | 283 (38.5%)    |
| 12 |                               | Rest of the World        | 80 (10.9%)     |
| 13 |                               |                          |                |
| 14 | <b>Family members (N=735)</b> |                          |                |
| 15 | Gender                        | Male                     | 489 (66.5%)    |
| 16 |                               | Female                   | 246 (33.5%)    |
| 17 |                               |                          |                |
| 18 |                               |                          |                |
| 19 | Age (years)                   | Mean (SD)                | 47.43 (13.582) |
| 20 |                               | Median                   | 48.00          |
| 21 |                               | Range                    | 18-87          |
| 22 |                               |                          |                |
| 23 | Occupation                    | Unemployed               | 42 (5.7%)      |
| 24 |                               | In paid work             | 530 (72.1%)    |
| 25 |                               | In education or training | 29 (3.9%)      |
| 26 |                               | In unpaid work           | 18 (2.4%)      |
| 27 |                               | Retired                  | 95 (12.9%)     |
| 28 |                               | Rather not say           | 21 (2.9%)      |
| 29 |                               |                          |                |
| 30 |                               |                          |                |
| 31 | Relationship to the person    | Spouse/Partner           | 571 (77.7%)    |
| 32 | affected with COVID-19        | Parents                  | 48 (6.5%)      |
| 33 |                               | Son/Daughter             | 77 (10.5%)     |
| 34 |                               | Brother/Sister           | 24 (3.3%)      |
| 35 |                               | Other                    | 15 (2%)        |
| 36 |                               |                          |                |
| 37 |                               |                          |                |
| 38 |                               |                          |                |
| 39 | Diagnosed with COVID-19       | No                       | 380 (51.7%)    |
| 40 |                               | Yes                      | 355 (48.3%)    |

Of the 735 COVID-19 survivors, 76.6% were females (mean and median age=48 years) and 73.3% were in paid employment. The mean time since COVID-19 symptoms started was 12.8 weeks (median=13 weeks). In 86.6% (n=637) > 4 weeks had elapsed since COVID-19 symptoms started and in 63.5% (n=467) >12 weeks had elapsed. Of the family members (mean age=48 years, median=47 years), 66.5 % were male and 72.1% were in paid employment. Most of the family members were partners (77.7%), followed by sons and daughters (10.5%) and parents (6.5%). In addition, 48.3 % of the family members had also contracted COVID-19 (Table 1).

### Quality of life impact of COVID-19 on survivors

The EQ-5D mean score was 1.73 (SD=0.39) with the 'usual activities' item scoring the highest (mean=2.06, max 3) followed by pain/discomfort (1.93) and anxiety/depression (1.84). The mean score of the visual analogue part of EQ-5D was 55 (SD=22.94) (Table 2).

**Table 2** Mean scores of EQ-5D and FROM-16 (n=735)

| Scale                             | Mean (SD)          | Median (interquartile range) | Range |
|-----------------------------------|--------------------|------------------------------|-------|
| <b>EQ-5D-3L domains</b>           |                    |                              |       |
| Overall                           | 8.65 (1.97)        | 9 (3)                        | 6-14  |
| Mobility                          | 1.59 (0.54)        | 2 (1)                        | 1-3   |
| Self-Care                         | 1.23 (0.45)        | 1 (0)                        | 1-3   |
| Usual Activities                  | <b>2.06</b> (0.68) | 2 (1)                        | 1-3   |
| Pain / Discomfort                 | <b>1.93</b> (0.56) | 2 (0)                        | 1-3   |
| Anxiety / Depression              | <b>1.84</b> (0.67) | 2 (1)                        | 1-3   |
| EQ-VAS n(733)                     | 55.83 (22.94)      | 60(35)                       | 3-100 |
| <b>FROM-16</b>                    |                    |                              |       |
| Overall                           | 15.00 (8.05)       | 15 (13)                      | 0-32  |
| <b>Emotional Domain</b>           |                    |                              |       |
| Worried                           | <b>1.43</b> (0.61) | 1 (1)                        | 0-3   |
| Angry                             | 0.75 (0.73)        | 1(1)                         | 0-3   |
| Sad                               | <b>1.05</b> (0.70) | 1 (1)                        | 0-3   |
| Frustrated                        | <b>1.24</b> (0.74) | 1 (1)                        | 0-3   |
| Talking about thoughts            | 0.84 (0.79)        | 1 (1)                        | 0-3   |
| Difficulty caring                 | 0.81 (0.76)        | 1 (1)                        | 0-3   |
| <b>Personal and Social Domain</b> |                    |                              |       |
| Time for self                     | 0.74 (0.76)        | 1 (1)                        | 0-3   |
| Everyday travel                   | 0.63 (0.78)        | 0 (1)                        | 0-3   |
| Eating habits                     | 0.65 (0.73)        | 0 (1)                        | 0-3   |
| Family activities                 | <b>1.26</b> (0.73) | 1 (1)                        | 0-3   |
| Holiday                           | <b>1.10</b> (0.88) | 1 (2)                        | 0-3   |
| Sex life                          | <b>1.09</b> (0.85) | 1 (2)                        | 0-3   |
| Work or study                     | 0.84 (0.79)        | 1 (1)                        | 0-3   |
| Family Relationship               | 0.73 (0.76)        | 1 (1)                        | 0-3   |
| Family expenses                   | 0.83 (0.82)        | 1 (2)                        | 0-3   |
| Sleep                             | <b>1.01</b> (0.79) | 1(2)                         | 0-3   |

Of the five dimensions of EQ-5D, 'pain and discomfort' was the impact most frequently reported (81.1%; 68.7 % some problems and 12.4% extreme problems), followed by usual activities (79.5%; 53.2% and 26.3%) and anxiety and depression (68.7%; 53.3% and 15.4%) (Figure 1). There was a

1 significant gender difference for 'mobility' and for 'pain and discomfort' ( $p \leq 0.05$ ) with females  
2  
3 being more impacted than males (Table 3).  
4

5  
6 Although existing health conditions were self-reported and severity was not stated, survivors with  
7  
8 existing health conditions did not appear to differ from those without such conditions except for  
9  
10 mobility  $p \leq 0.05$ ) (Table 3). Having an existing health condition was not a clear predictor of impact on  
11  
12 the family member/partner's QoL.. There was a significant difference between the survivors who had  
13  
14 been hospitalised for COVID-19 (20%) and those who had not, with the hospitalised survivors being  
15  
16 more severely affected across mobility, self-care ( $p \leq 0.001$ ) and usual activities ( $p \leq 0.02$ ) (Table 3).  
17

18  
19 There were significant differences in EQ-5D mean scores between survivors with respect to weeks  
20  
21 since first had COVID-19 ( $p < 0.001$ ). Mean EQ-5D scores of survivors having COVID-19 symptoms  
22  
23 for up to 4 weeks was 8.03 (SD=1.97), 5-11 weeks was 8.3 (SD=2.13) and 12 weeks and above was  
24  
25 8.9 (SD=1.86).  
26  
27  
28  
29  
30  
31  
32  
33  
34  
35  
36  
37  
38  
39  
40  
41  
42  
43  
44  
45  
46  
47  
48  
49  
50  
51  
52  
53  
54  
55  
56  
57  
58  
59  
60

, Table 3 Comparisons † of EQ-5D scores for gender, existing health condition and hospitalisation

| EQ-5D domain         | Gender       |                | p-value**    | Existing health condition |            | p-value**    | Hospitalised for COVID-19 |            | p-value**     |
|----------------------|--------------|----------------|--------------|---------------------------|------------|--------------|---------------------------|------------|---------------|
|                      | Mean score   |                |              | Mean score                |            |              | Mean score                |            |               |
|                      | Male (n=172) | Female (n=563) |              | Yes (n=227)               | No (n=508) |              | Yes (n=148)               | No (n=587) |               |
| Overall              | 8.33         | 8.74           | <b>0.036</b> | 8.89                      | 8.54       | <b>0.012</b> | 9.17                      | 8.51       | <b>0.001</b>  |
| Mobility             | 1.51         | 1.61           | <b>0.037</b> | 1.67                      | 1.55       | <b>0.006</b> | 1.75                      | 1.54       | <b>0.0001</b> |
| Self-Care            | 1.22         | 1.24           | 0.602        | 1.28                      | 1.21       | 0.053        | 1.36                      | 1.20       | <b>0.0001</b> |
| Usual Activities     | 1.97         | 2.08           | 0.065        | 2.14                      | 2.02       | <b>0.034</b> | 2.19                      | 2.02       | <b>0.009</b>  |
| Pain / Discomfort    | 1.82         | 1.97           | <b>0.002</b> | 1.93                      | 1.94       | 0.989        | 1.99                      | 1.92       | 0.141         |
| Anxiety / Depression | 1.81         | 1.85           | 0.611        | 1.88                      | 1.82       | 0.289        | 1.88                      | 1.83       | 0.427         |

† Mann Whitney U test

\*\*p values were calculated using mean rank scores but mean scores are presented here for ease of understanding.

## Quality of life impact of COVID-19 on family members

The mean FROM-16 score was 15, reflecting the extent of the impact of the survivors' COVID-19 on the HRQoL of their family members (Table 2). The mean score of each of the 16 items is given in Table 2 with 'Feeling worried' scoring highest (1.46) followed by family activities, frustration, holiday, and sex life (1.26, 1.24, 1.10 and 1.09, respectively) (Table 2). Of the FROM-16 items, the feeling of being worried was most frequently reported (93.6%; 44.6% a little, 49% a lot), followed by family activities (83.3%; 41% , 42.3%), feeling of frustration (81.7%; 39.7% , 42% ), feeling sad (78.4%; 51.2%, 27.2 %), sleep (68.9%; 37.1%, 31.8 %) and sex life (68.1%; 26.7%, 41.4%) (Figure 2).

There was a significant gender difference among family members, with females feeling more sad, experiencing more impact on everyday travel ( $p \leq 0.01$ ) and on their sleep  $p \leq 0.05$ ). The impact on sex life was experienced significantly more by males than females ( $p \leq 0.001$ ) (Table 4).

**Table 4** Comparisons of FROM-16 scores for gender and for whether diagnosed with COVID-19 (n=735)

| FROM-16 Items          | Gender          |                   | p-value**    | Diagnosed with COVID-19 |               | p-value**    |
|------------------------|-----------------|-------------------|--------------|-------------------------|---------------|--------------|
|                        | Mean score      |                   |              | Mean score              |               |              |
|                        | Male<br>(n=489) | Female<br>(n=246) |              | Yes<br>(n=355)          | No<br>(n=380) |              |
| Overall                | 14.81           | 15.36             | 0.401        | 15.74                   | 14.32         | <b>0.017</b> |
| Worried                | 1.40            | 1.48              | 0.068        | 1.46                    | 1.39          | 0.135        |
| Angry                  | 0.73            | 0.79              | 0.332        | 0.77                    | 0.74          | 0.519        |
| Sad                    | 1.00            | 1.16              | <b>0.004</b> | 1.09                    | 1.03          | 0.225        |
| Frustrated             | 1.23            | 1.26              | 0.569        | 1.30                    | 1.18          | 0.054        |
| Talking about thoughts | 0.83            | 0.87              | 0.651        | 0.89                    | 0.80          | 0.132        |
| Difficulty caring      | 0.79            | 0.85              | 0.324        | 0.81                    | 0.80          | 0.847        |
| Time for self          | 0.70            | 0.83              | <b>0.036</b> | 0.78                    | 0.71          | 0.164        |
| Everyday travel        | 0.58            | 0.72              | <b>0.048</b> | 0.64                    | 0.62          | 0.874        |
| Eating habits          | 0.64            | 0.67              | 0.565        | 0.72                    | 0.59          | <b>0.015</b> |
| Family activities      | 1.28            | 1.21              | 0.144        | 1.32                    | 1.20          | <b>0.041</b> |
| Holiday                | 1.10            | 1.10              | 0.992        | 1.17                    | 1.03          | <b>0.030</b> |
| Sex life               | 1.22            | 0.84              | <b>0.000</b> | 1.17                    | 1.03          | <b>0.035</b> |
| Work or study          | 0.83            | 0.87              | 0.485        | 0.92                    | 0.77          | <b>0.013</b> |
| Family relationships   | 0.69            | 0.79              | 0.109        | 0.75                    | 0.70          | 0.281        |
| Family expenses        | 0.81            | 0.87              | 0.367        | 0.84                    | 0.83          | 0.759        |
| Sleep                  | 0.98            | 1.07              | 0.138        | 1.12                    | 0.90          | <b>0.000</b> |

<sup>†</sup>Mann Whitney U test;

\*\*p values were calculated using mean rank scores but mean scores are presented here for ease of understanding.

1 Those with a COVID-19 history experienced a greater impact on eating habits, work and study,  
2 family activities, holiday ( $p \leq 0.05$ ), sex life and sleep ( $p \leq 0.001$ ). There were no significant differences  
3 for the remaining 10 items of FROM-16 (Table 4).  
4  
5  
6

7  
8 There were significant differences in FROM-16 mean scores between family members of survivors  
9 with respect to onset of COVID-19 symptoms ( $p < 0.01$ ). Mean FROM-16 scores of family members  
10 of survivors having COVID-19 symptoms for up to 4 weeks was 16.11 (SD=7.35), 5-11 weeks was  
11 13.31 (SD=7.77) and 12 weeks and above was 15.38 (SD=8.21).  
12  
13  
14  
15

### 16 **Relationship between the quality of life of survivors and their family members**

17  
18 There were significant positive correlations between the EQ-5D score and the survivors' gender,  
19 hospital stay, existing health condition and weeks since first had COVID-19 ( $p < 0.05$ ,  $p < 0.001$ )  
20 (Table 5).  
21  
22  
23  
24  
25

26  
27 There was a significant positive association between the family members' FROM-16 scores and the  
28 survivors' EQ-5D scores ( $p < 0.001$ ) (Tables 5) and a significant negative association between  
29 FROM-16 scores and the family members' age, survivors' age and EQ-VAS scores ( $p < 0.05$ ).  
30  
31  
32

33  
34 The EQ-VAS scores showed a significant inverse relationship with EQ-5D ( $p < 0.01$ ). However, other  
35 variables such as hospital stay, existing health condition and gender (being female) were associated  
36 with lower EQ-VAS scores ( $p < 0.05$ ), that is, lower health status (Table 5).  
37  
38  
39  
40

### 41 **Can quality of life predict outcomes?**

42  
43 The results of multiple regression analyses indicated that survivors' demographics, weeks since first  
44 had COVID-19 and hospital stay were significant predictors of the extent of impact on QoL of the  
45 survivor ( $p=0.001$ ) while the survivors' existing health condition was not a predictor (Tables 6).  
46  
47  
48

49  
50 Inclusion of variables such as EQ-5D scores, family members' COVID-19 history, family members'  
51 gender and relationship to the survivor in the model predicted family reported outcomes ( $p=0.001$ )  
52 while family members' age, survivors' age, weeks since first had COVID-19, existing health  
53 condition and hospital stay were not significant predictors of QoL of family members (Table 7). The  
54  
55  
56  
57  
58  
59  
60

1 multiple regression analyses confirmed that the QoL of family members/partner was more impacted  
2  
3  
4 than survivors, female family members were affected more than males, family members with a history  
5  
6 of COVID-19 were affected more than those without and partners were affected substantially more  
7  
8 than those of other relationships. In addition, the model predicted that younger survivors' functional  
9  
10 behaviour (both physical and psychosocial) was more impacted by COVID-19.  
11  
12  
13  
14  
15  
16  
17  
18  
19  
20  
21  
22  
23  
24  
25  
26  
27  
28  
29  
30  
31  
32  
33  
34  
35  
36  
37  
38  
39  
40  
41  
42  
43  
44  
45  
46  
47  
48  
49  
50  
51  
52  
53  
54  
55  
56  
57  
58  
59  
60

For peer review only

**Table 5** Correlation <sup>†</sup> matrix demonstrating the relationships between EQ-5D, FROM-16 and the participant demographics (n=735)

|                                      | 1        | 2        | 3       | 4       | 5        | 6      | 7      | 8      | 9       | 10 |
|--------------------------------------|----------|----------|---------|---------|----------|--------|--------|--------|---------|----|
| 1 EQ-5D score                        | 1        |          |         |         |          |        |        |        |         |    |
| 2 FROM-16 score                      | 0.467**  | 1        |         |         |          |        |        |        |         |    |
| 3 EQ-VAS (n=733)                     | -0.591** | -0.346** | 1       |         |          |        |        |        |         |    |
| 4 COVID-19 survivor age (years)      | -0.020   | -0.118*  | -0.075  | 1       |          |        |        |        |         |    |
| 5 COVID-19 survivor gender           | 0.077*   | -0.024   | -0.102* | 0.064   | 1        |        |        |        |         |    |
| 6 Stayed in a hospital for COVID-19  | 0.127*   | 0.073    | -0.097* | 0.143*  | -0.091*  | 1      |        |        |         |    |
| 7 Survivor existing health condition | 0.093*   | 0.066    | -0.104* | 0.201** | 0.036    | 0.134* | 1      |        |         |    |
| 8 Weeks since first had COVID-19     | 0.164*   | 0.029    | -0.218  | 0.158*  | 0.032    | 0.097* | 0.042  | 1      |         |    |
| 9 Family member age (years)          | -0.015   | -0.077   | -0.025  | 0.535** | 0.066    | 0.034  | 0.145* | 0.108* | 1       |    |
| 10 Family member gender              | -0.030   | 0.031    | 0.032   | -0.008  | -0.507** | 0.097* | 0.050  | -0.034 | -0.113* | 1  |

<sup>†</sup>Spearman's Rank; \*p ≤ 0.05, \*\*p ≤ 0.01, 2-tailed.

The numbers 1-10 in the horizontal heading bar represent the same numbers as given in the left-hand column. Each number refers to the variable described next to it.

**Table 6** Summary of survivors' characteristics predicting EQ-5D scores\* (n=735)

| Predictor                       | Unstandardised coefficients |            | Standardised coefficients | p-value | 95% confidence interval levels for B |             | R <sup>2</sup> | Adjusted R <sup>2</sup> | F-test | p-value |
|---------------------------------|-----------------------------|------------|---------------------------|---------|--------------------------------------|-------------|----------------|-------------------------|--------|---------|
|                                 | B                           | Std. Error | Beta                      |         | Lower level                          | Upper Level |                |                         |        |         |
| Survivor Age                    | -0.013                      | 0.006      | -0.076                    | 0.043   | -0.025                               | 0.000       | 0.058          | 0.051                   | 8.907  | 0.0001  |
| Existing health condition       | 0.298                       | 0.157      | 0.070                     | 0.059   | -0.011                               | 0.607       |                |                         |        |         |
| Hospital stay for COVID-19      | 0.644                       | 0.181      | 0.131                     | 0.0001  | 0.288                                | 1.001       |                |                         |        |         |
| Weeks since first had COVID- 19 | 0.050                       | 0.012      | 0.154                     | 0.0001  | 0.027                                | 0.073       |                |                         |        |         |
| Survivor gender                 | -0.471                      | 0.169      | -0.101                    | 0.005   | -0.802                               | -0.139      |                |                         |        |         |

\*Multiple regression; B=the slope of the line between the predictor variable and the dependent variable – the larger the number, the more spread out the points are from the regression line; F-test=degree of the linear regression model fitting the data; R<sup>2</sup> = how well the model fits the data; Males=1 and females =0; females are the reference group.



**Table 7** Summary of family member/partner characteristics predicting FROM-16 scores\* (n=753)

| Predictor                                 | Unstandardised coefficients |            | Standardised coefficients | p-value | 95% confidence interval levels for B |             | R <sup>2</sup> | Adjusted R <sup>2</sup> | F-test | p-value |
|-------------------------------------------|-----------------------------|------------|---------------------------|---------|--------------------------------------|-------------|----------------|-------------------------|--------|---------|
|                                           | B                           | Std. Error | Beta                      |         | Lower Level                          | Upper Level |                |                         |        |         |
|                                           |                             |            |                           |         |                                      |             | 0.272          | 0.260                   | 22.506 | 0.0001  |
| EQ-5D score                               | 2.019                       | 0.134      | 0.495                     | 0.001   | 1.757                                | 2.282       |                |                         |        |         |
| Age family member                         | -0.044                      | 0.030      | -0.073                    | 0.144   | -0.102                               | 0.015       |                |                         |        |         |
| Survivor’s weeks since first had COVID-19 | -0.064                      | 0.043      | -0.048                    | 0.144   | -0.149                               | 0.022       |                |                         |        |         |
| Family member gender                      | -1.357                      | 0.587      | -0.080                    | 0.021   | -2.510                               | -0.204      |                |                         |        |         |
| Have you also had COVID-19?               | 1.138                       | 0.524      | 0.071                     | 0.030   | 0.109                                | 2.167       |                |                         |        |         |
| Relationship                              |                             |            |                           |         |                                      |             |                |                         |        |         |
| parent                                    | -1.061                      | 1.204      | -0.033                    | 0.379   | -3.426                               | 1.303       |                |                         |        |         |
| sons and daughters                        | -3.243                      | 1.108      | -0.123                    | 0.004   | -5.419                               | -1.067      |                |                         |        |         |
| brothers and sisters                      | -4.079                      | 1.476      | -0.090                    | 0.006   | -6.977                               | -1.180      |                |                         |        |         |
| other                                     | -2.728                      | 1.827      | -0.048                    | 0.136   | -6.314                               | 0.859       |                |                         |        |         |
| Survivor age                              | -0.040                      | 0.032      | -0.059                    | 0.201   | -0.103                               | 0.022       |                |                         |        |         |
| Survivor existing health condition        | 0.658                       | 0.574      | 0.038                     | 0.252   | -0.468                               | 1.785       |                |                         |        |         |
| Survivor hospital stay for COVID-19       | 0.547                       | 0.660      | 0.027                     | 0.408   | -0.749                               | 1.842       |                |                         |        |         |

\*Multiple regression; B=the slope of the line between the predictor variable and the dependent variable – the larger the number, the more spread out the points are from the regression line; F-test=degree of the linear regression model fitting the data; R<sup>2</sup> = how well the model fits the data; Males=1 and females =0; females are the reference group.

## DISCUSSION

This study fills an important knowledge gap in measuring the impact of COVID-19 on the HRQoL of both the survivors and, importantly, their partners and family members. Health-related quality of life is defined as a person's perception of his/her physical, mental, social and overall well-being (8, 9).

Therefore, its assessment embraces a wider view of the impact of COVID-19.

This study has revealed that the pandemic has a major impact on lives of those who have survived the infection. The survey depended on the patient's self-report of the diagnosis of COVID-19 infection and did not specifically ask whether patients had had a COVID-19 positive test. However, further authentication of the diagnosis is given by both the patient and their relative having answered the survey. Pain and discomfort were the most frequently reported problem by COVID-19 survivors, followed by impact on their usual activities, anxiety and depression, affecting females to a greater extent. As the majority of COVID-19 survivors were in paid employment, being physically unwell might have impacted their usual activities or return to work. According to a review on return to work after critical illness (10), globally, a third of previously employed survivors after intensive care stays remained out of work after five years.

In the survey, COVID-19 survivors were asked whether they were 'already suffering from some existing chronic health condition (such as diabetes, heart disease, lung disease)' prior to the infection with COVID-19. Survivors with existing health conditions did not differ significantly from those without such conditions except for mobility and usual activities however, having an existing health condition was not a significant predictor of impact on the family member/partner's QoL. The survivor's QoL was impacted greatly irrespective of having an existing health condition as it was not clear predictor of EQ-5D scores in regression analysis. Hospitalised survivors reported greater impact on mobility, self-care and usual activities compared to those who had not been hospitalised. This survey did not ask respondents whether those hospitalised were admitted to ICU. So we are not able to draw any conclusion concerning the relationship of admission to ICU to later QoL.

The study also revealed a major impact on QoL of the survivors' partners and family members with partners being most impacted. Currently Minimal Clinically Important Difference (MCID) for

1 FROM-16 has not been published; however, MCID values for such questionnaires usually are  
2  
3 approximately 10-20% of the total score range, and so we would expect the FROM-16 MCID to be  
4  
5 approximately 3 to 6. If this is the case, the statistically significant differences reported would also be  
6  
7 clinically significant. Nearly half of participating partners and family members also reported having  
8  
9 had COVID-19. Although there were no significant differences between the family members with  
10  
11 COVID-19 and those without across 10 of the 16 QoL items of FROM-16, eating habits, family  
12  
13 activities, holiday, sleep, sex-life and work or study were impacted significantly more in those who  
14  
15 had had COVID-19. Overall FROM-16 scores were higher for partners and family members with  
16  
17 COVID-19 after adjusting for age, gender, relationship to survivor and the overall survivors' EQ-5D  
18  
19 scores, thus indicating poorer QoL for family members with COVID-19 than for those without.  
20  
21

22  
23 Most partners and family members reported being worried and frustrated, many reported sadness,  
24  
25 inability to talk to someone and difficulty in caring for their loved ones. This is not surprising in a  
26  
27 situation with constant media coverage with emphasis on high daily death rates, the fear of infecting  
28  
29 loved ones, stigma due to community or family members blaming survivors for the spread of the  
30  
31 illness, isolation of loved ones, inability of a family member to provide support, and prolonged  
32  
33 recovery time (11). Such stressors have been implicated in the poor psychological and emotional  
34  
35 health of survivors and their family members (11-14).  
36  
37

38  
39 Family members reported an impact on sexual life as a result of their relative's COVID-19 and this  
40  
41 impact was higher in males and in family members who has also contracted COVID-19. Two-thirds  
42  
43 of family members were either spouses or partners, who could have experienced these difficulties  
44  
45 because of the contagious nature of COVID-19 and because of post survival symptoms. Moreover,  
46  
47 physical illness in partners has a significant impact on marital relationships, contributing to marital  
48  
49 dissatisfaction and likelihood of later divorce (15). Over half of partners and family members reported  
50  
51 impact on holidays and nearly half reported an increase in expenses due to their relative's COVID-19.  
52  
53

54  
55 One of the key findings of this study is the evidence that in survivors in whom the COVID-19 onset  
56  
57 was more than 12 weeks ago, there was still a major persisting impact on QoL across all domains in  
58  
59 both survivors and family members. This provides further evidence of the severe impact of post-  
60

1 acute COVID-19 (“Long COVID”) and “Chronic COVID” (16). According to NICE, the term ‘long  
2 COVID’ “ is commonly used to describe signs and symptoms that continue or develop after acute  
3 COVID-19. It includes both ongoing symptomatic COVID-19 (from 4 to 12 weeks) and post-COVID-  
4 COVID-19 syndrome (12 weeks or more)” (17). The term ‘Persisting’ refers to the continuity of the impact of  
5 COVID-19 on survivor’s health since the onset of COVID-19 infection.  
6  
7

8  
9  
10  
11  
12 Interestingly, of the patients who participated, most (76.6%) were women, as found in other  
13 surveys(18); however, there was a higher proportion of men among participating family members  
14 (66.5%). This may be because the majority of COVID-19 social media support groups have been  
15 initiated by women (patients), and the most convenient family person to ask to participate might be  
16 their partners (mostly male).  
17  
18

### 19 **Comparison with other studies**

20  
21  
22 Chinese survivors of COVID-19 reported lower HRQoL with significant impact on their physical and  
23 psychological health, one month after recovery (19). Our study has shown a major impact not only on  
24 the HRQoL of survivors of COVID-19 but also on their partners and family members. This is  
25 consistent with the findings of Golics et al. (2, 20) that multiple elements of family members' lives  
26 can be affected by a relative's illness including emotional, financial, family relationships, education  
27 and work, leisure time, and social activities.  
28  
29

30  
31  
32 Our study has shown that most (87%) survivors had COVID-19 for more than 4 weeks, and 64%  
33 more than 12 weeks indicating that survivors continued to remain unwell for long periods of time, due  
34 to post-viral symptoms or ‘long COVID’. This is in contrast to a UK COVID-19 symptom study (21),  
35 where only 10% of COVID-19 positive survivors remained unwell at three weeks, and a small  
36 proportion for more than three months. An online survey of British doctors in August 2020 revealed  
37 that many were being treated for long term COVID-19 symptoms such as chronic fatigue, muscle  
38 weakness, loss of sense of smell, and concentration difficulties (22)  
39  
40  
41  
42  
43  
44  
45  
46  
47  
48  
49  
50  
51  
52

53  
54 In our study 69% COVID-19 survivors reported feelings of anxiety and depression, much higher than  
55 the 43.1% reported by Ma Y-F et al. (9) in clinically stable patients with COVID-19. Previous studies  
56 of Severe Acute Respiratory Syndrome (SARS) revealed the persistence of depression in patients up  
57 to 30 months after discharge from hospital (23, 24).  
58  
59  
60

1 Several studies have shown the impact of COVID-19 on sleep patterns of survivors, with an increase  
2 in prevalence of insomnia (25-27). We do not know whether the sleep patterns of survivors in our  
3 study were also impacted, since EQ-5D does not include such an item. However, in our study 69 %  
4 of partners and family members experienced problems with sleep, and 32% reported that their sleep  
5 was impacted “a lot”.

6 The total mean domain scores for FROM-16 in this study were 6.12 (Emotional) and 8.88 (Personal  
7 and Social Life) which are higher than the mean domain scores reported by Golics et al. (5)  
8 (Emotional=5.6; Personal and Social Life=6.7) on the impact of patients’ chronic disease on family  
9 members across 26 medical specialties. Another study (4) reported the mean domain scores of family  
10 members of patients with cancer as Emotional=4.7 and Personal and Social Life=7.1. In a FROM-16  
11 study on family members of patients with urinary stone disease, family members were not impacted  
12 much by their relative’s disease, however they reported a slightly greater degree of change in the  
13 ‘emotional’ domain compared with the ‘personal and social life’ domain (28). This indicates that  
14 family members of COVID-19 survivors suffered more than family members of patients with other  
15 severe chronic diseases.

### 16 **Strengths and Limitations.**

17 This study to our knowledge is the first global study to explore the impact of COVID-19 on both  
18 survivors and also their family members/partner. Other strengths include the large sample size,  
19 heterogenous population and use of validated tools to assess QoL impact. The study has demonstrated  
20 use of the FROM-16 questionnaire for studying the effects of a pandemic on family members of an  
21 infected person.

22 This study has several limitations. Firstly, it suffers from considerable selection bias as only those  
23 COVID-19 survivors and family members who could access the internet and were active on social  
24 media completed the online questionnaires, limiting generalisability of the study findings. It is also  
25 possible that people who experienced persisting symptoms may have been more likely to have  
26 participated in the study. This survey was conducted internationally in the English language. Although  
27 FROM-16 is available to researchers in several languages, our full survey documents and the  
28 participant information sheet were only available to the participants in the English language, and in  
29

1 the survey FROM-16 was also only provided in English. Participants could only take part if they  
2 could understand all of the documentation. The ability of some respondents to read and understand  
3 English may have been limited, but we are not able to assess this. However, during the development  
4 of, in particular, FROM-16, the following issues were considered as part of its conceptualisation and  
5 development in order to improve its universality and translatability: 1) applying readability to the level  
6 of understanding of a 12 year old; 2) formatting of the items into short and complete sentences of  
7 about six words to enhance clarity of meaning; 3) ensuring ease of understanding to allow future  
8 cross-cultural adaptation, facilitating universality and translatability. Although we did not develop the  
9 EQ-5D, that questionnaire was also designed to be as universally understandable as possible.

10 Concerning the wider survey questions, we took several steps in the development of the survey to  
11 ensure maximum comprehensibility: 1) We ensured that the readability was acceptable to a 12-year-  
12 old standard; 2) We carried out an international pilot including participants for whom English was not  
13 their first language and made adjustments accordingly; 3) The survey was reviewed by our patient  
14 study research partners.

15 Secondly, the study, being cross-sectional, cannot establish causal relationships among the study  
16 variables. Because of the nature of the study, we could not collect any baseline measurements (pre-  
17 COVID-19 measurements). We are, therefore, not able to differentiate between the effect of COVID-  
18 19 infection or of a pre-existing physical or mental state. However, only 30.9% of respondents had  
19 any existing health condition, and therefore this limitation only refers to this small proportion of  
20 respondents. In addition, as all the covariates in the study were self-reported, data on hospitalisation  
21 and medical problems could be inaccurate and is a potential limitation(29). This study does not have a  
22 control group but in healthy volunteers in the UK, mean EQ-5D scores were EQ-VAS = 82.75,  
23 Mobility = 0.18, Self-Care = 0.04, Usual Activity = 0.16, Pain/Discomfort = 0.33, Anxiety /  
24 Depression = 0.20 (30). In contrast, COVID-19 survivors (47.1 % of survey respondents were from  
25 the UK) in our study had mean scores of EQ-VAS = 55.83, Mobility = 1.59, Self-Care = 1.23, Usual  
26 Activity = 2.06, Pain / Discomfort = 1.93, Anxiety / Depression = 1.84. This suggests that overall  
27 HRQoL was highly impaired in the COVID-19 survivors across all domains. Furthermore, the study  
28 was carried out between June and August 2020 when the severity of the pandemic varied among  
29

1 different countries. Therefore, the study results may have been influenced by the specific local and  
2 governmental measures in place at the time. It is likely that participants will have been living under  
3 different government restrictions, thereby possibly influencing responses to the questionnaires.  
4  
5 However, because of the complexity of the international situation, we are not able to account for this.  
6  
7 Although formal cultural adaptation of the survey questionnaire was not carried out, we endeavoured  
8 to ensure maximum understandability and acceptability. It should be noted that the questions asked  
9 are mostly universal in nature and do not refer to culturally specific practices such as semantic  
10 differences. However, despite these limitations, the study has provided a rapid overview of survivors'  
11 and their family members' HRQoL and revealed evidence of the substantial persisting effect on QoL  
12 of survivors and a major secondary impact on the lives of partners and family members. This  
13 information can be used to inform policymakers about the health needs of these individuals and may  
14 encourage the development of tailor-made support services.  
15  
16  
17  
18  
19  
20  
21  
22  
23  
24  
25  
26

### 27 **Implications for clinicians and policymakers**

28  
29 Our results have shown how the impact of COVID-19 on one family member can have a domino  
30 effect on other family members, especially those close to them such as partner, parents and children. It  
31 is important to understand the needs of these impacted family members and survivors to ensure the  
32 overall wellbeing of the family unit. Based on the findings of this study, policymakers should consider  
33 developing and commissioning the following support services for survivors and family members:  
34  
35  
36  
37  
38  
39

40 *Post COVID-19 clinics:* Survivors reported pain and discomfort even after 12 weeks of COVID-19,  
41 indicating that tailored services to deal with such symptoms are important to help survivors suffering  
42 with long term sequelae. Survivors with post-COVID-19 complications should be heard and treated.  
43  
44  
45

46 Although such clinics have been started in a few countries, there is a considerable need for such  
47 initiatives globally.  
48  
49

50 *Needs-based mental health counselling:* Most family members and survivors reported being depressed  
51 and worried. It is imperative to further develop care services to ensure the mental wellbeing of  
52 survivors and their family members.  
53  
54  
55

56  
57 *Physical activity and rehabilitation services:* Most survivors have reported pain and discomfort and  
58 an inability to do their normal activities. Rehabilitation clinics could provide emotional and physical  
59  
60

1 support to physically and emotionally drained survivors and their family members to enable their  
2 return to normal routines.  
3  
4

5  
6 *Social support services:* Patients with COVID-19 are from diverse backgrounds and therefore will  
7 benefit from culturally and socially appropriate support. Financial assistance is particularly important  
8 for those who do not have health insurance to cover COVID-19 expenses.  
9  
10

11  
12  
13 *Patient support groups/local support groups for COVID-19 survivors and family members:* Local  
14 support groups could be used in primary care settings and can help by significantly combating  
15 isolation and the disability the study has identified that occurs in COVID-19 survivors and their  
16 family members/partners. This could in turn have health economic benefits by possibly reducing long-  
17 term utilisation of mental health services. Similar approaches have been successful, for example in  
18 supporting people with myalgic encephalitis.  
19  
20  
21  
22  
23  
24

## 25 **Future research and recommendations**

26  
27 Although this study provided an overview of the impact of COVID-19 on survivors' partners and  
28 family members, it was not designed to identify causal relationship. Future longitudinal studies are  
29 needed to understand the long-term impact of COVID-19. As COVID-19 is still a major challenge,  
30 with people experiencing 'long COVID', there is a need for further research including long term  
31 studies to better understand 'long COVID' and its impacts on survivors and family members.  
32  
33  
34  
35  
36  
37  
38

39 However, the way the participants were recruited for the current study does not allow us to have  
40 access to follow-up data from this cohort. We were unable to measure the impact of COVID-19 on  
41 sleep and sex-life of survivors, future studies should measure such impacts.  
42  
43  
44  
45  
46  
47

## 48 **CONCLUSION**

49  
50 Survivors of COVID-19 report a major persisting impact on their QoL with many feeling unwell  
51 beyond 12 weeks. This indicates a demand for a holistic support system that is sensitive to their needs.  
52 Moreover, the QoL of partners and family members is also severely impacted, demonstrating the  
53 importance of investigating disease impact on family QoL. The establishment of services to provide  
54 support to family members of survivors and patients in general is therefore a key consideration in the  
55  
56  
57  
58  
59  
60



1 future management of COVID-19. Although the recruitment method used inevitably leads to some  
2 degree of selection bias which in turn may dilute the generalisability of the study findings, the central  
3 conclusions of this study, that COVID-19 has a profound and long-lasting impact on survivors and  
4 their family members continue to remain valid.  
5  
6  
7  
8  
9

## 10 11 12 **Acknowledgements**

13 We are grateful to all the COVID-19 survivors and family members/partners who participated in this  
14 study. We are grateful to the other 'patient and family research' study partners, Helen Allen and  
15 Marie Nixon, for their invaluable contribution.  
16

17 **Funding:** There was no external funding for this Cardiff University study.  
18

19 **Competing interests:** All authors have completed the ICMJE uniform disclosure form  
20 at [www.icmje.org/coi\\_disclosure.pdf](http://www.icmje.org/coi_disclosure.pdf) and declare: no support from any organisation for the submitted  
21 work; RS and SJN declared no competing interest, AYF and SS are joint copyright owners of Family  
22 Reported Outcome Measure (FROM-16). JRI reports personal fees from UCB Pharma, personal fees  
23 from Novartis, personal fees from Boehringer Ingelheim, personal fees from Kymera Therapeutics,  
24 personal fees from Viela Bio, personal fees from UpToDate, personal fees from Editor of British  
25 Journal of Dermatology, outside the submitted work; in addition, JRI is co-copyright holder of the  
26 Hidradenitis Suppurativa Quality of Life (HiSQOL) score. FMA reports grants and personal fees from  
27 Janssen, personal fees from Abbvie, personal fees from Lilly Pharmaceuticals, personal fees from  
28 L'Oreal, personal fees from LEO Pharmaceuticals, personal fees from UCB, outside the submitted  
29 work.  
30  
31  
32

33 **Author contributions:** RS primarily carried out the study. wrote first drafts and revised all  
34 documentation. SS and AYF equally contributed to the design and supervision of the study and  
35 revised all study documentation and the manuscript. FMA, JRI and SJN provided advice during the  
36 study and helped revise study documentation. FMA, JRI and SJN reviewed the manuscript. The  
37 corresponding author attests that all listed authors meet authorship criteria and that no others meeting  
38 the criteria have been omitted.  
39

40 **Public and Patient Involvement (PPI):** Twenty members of the public, including some work  
41 colleagues, participated in the pilot study. Some had experience of having COVID-19 patient in their  
42 family. The study sociodemographic questions were extensively modified following the outcome of  
43 the pilot study. The 'patients and family member group' consisting of two patients and one family  
44 member, were involved as study research partners. This group was involved in reviewing the study  
45 protocol, other related documents and the manuscript.  
46  
47

48 **Ethical approval:** Ethics approval was granted by the Cardiff University School of Medicine  
49 Research Ethics Committee (SMREC 20/60).  
50

51 **Data sharing:** This paper does not report a trial. If requested, we are happy to share our data.  
52

53 **Transparency statement:** The lead author RS affirms that this manuscript is an honest, accurate, and  
54 transparent account of the study being reported; that no important aspects of the study have been  
55 omitted; and that any discrepancies from the study as planned (and, if relevant, registered) have been  
56 explained.  
57

58 **Dissemination to participants and related patient and public communities:** The summary of the  
59 results will also be disseminated by social media using the same methods as used for recruiting  
60

1 participants and made accessible to public and patients through the Cardiff University FROM-16  
2 website page  
3  
4  
5

## 6 **Figure legends**

7 **Figure 1** COVID-19 survivor response to EQ-5D-3L (n=735)

8 **Figure 2** Partner and family member response to FROM-16 items (n=735)  
9  
10  
11  
12  
13

## 14 **References**

- 15 1. Holmes EA, O'Connor RC, Perry VH, Tracey I, Wessely S, Arseneault L, et al.  
16 Multidisciplinary research priorities for the COVID-19 pandemic: a call for action for mental health  
17 science. *The Lancet Psychiatry*. 2020;7(6):547-60.  
18
- 19 2. Golics CJ, Basra MK, Salek MS, Finlay AY. The impact of patients' chronic disease on  
20 family quality of life: an experience from 26 specialties. *Int J Gen Med*. 2013;6:787-98.  
21
- 22 3. Jisc. Online Surveys. Jisc, Bristol, UK. 2020 [Available from:  
23 <https://www.onlinesurveys.ac.uk/>.  
24  
25
- 26 4. EQ-5D-3L. User Guide 2018 [Available from: Available from:  
27 <https://euroqol.org/publications/user-guides>.  
28  
29
- 30 5. Golics CJ, Basra MK, Finlay AY, Salek S. The development and validation of the Family  
31 Reported Outcome Measure (FROM-16)© to assess the impact of disease on the partner or family  
32 member. *Quality of life research : an international journal of quality of life aspects of treatment, care  
33 and rehabilitation*. 2014;23(1):317-26.  
34
- 35 6. FROM-16. Family Reported Outcome Measure [Online] 2020 [Available from: Available:  
36 [https://www.cardiff.ac.uk/medicine/resources/quality-of-life-questionnaires/family-reported-outcome-  
37 measure](https://www.cardiff.ac.uk/medicine/resources/quality-of-life-questionnaires/family-reported-outcome-measure).  
38  
39
- 40 7. Chantarasap P, Johns NP, Pairojkul S, Sookprasert A, Wirasorn K, Cheawchanwattana A, et  
41 al. Validation of the Thai version of the family reported outcome measure (FROM-16)© to assess the  
42 impact of disease on the partner or family members of patients with cancer. *Health Qual Life  
43 Outcomes*. 2019;17(1):32.  
44
- 45 8. Papakostas GI, Petersen T, Mahal Y, Mischoulon D, Nierenberg AA, Fava M. Quality of life  
46 assessments in major depressive disorder: a review of the literature. *Gen Hosp Psychiatry*.  
47 2004;26(1):13-7.  
48
- 49 9. Ma Y-F, Li W, Deng H-B, Wang L, Wang Y, Wang P-H, et al. Prevalence of depression and  
50 its association with quality of life in clinically stable patients with COVID-19. *J Affect Disord*.  
51 2020;275:145-8.  
52  
53  
54  
55  
56  
57  
58  
59  
60

10. Kamdar BB, Suri R, Suchyta MR, Digrande KF, Sherwood KD, Colantuoni E, et al. Return to work after critical illness: a systematic review and meta-analysis. *Thorax*. 2020;75(1):17-27.
11. Sahoo S, Mehra A, Suri V, Malhotra P, Yaddanapudi LN, Dutt Puri G, et al. Lived experiences of the corona survivors (patients admitted in COVID wards): A narrative real-life documented summaries of internalized guilt, shame, stigma, anger. *Asian J Psychiatr*. 2020;53:102187-.
12. Tansey CM, Louie M, Loeb M, Gold WL, Muller MP, de Jager J, et al. One-Year Outcomes and Health Care Utilization in Survivors of Severe Acute Respiratory Syndrome. *Archives of Internal Medicine*. 2007;167(12):1312-20.
13. Li Q, Guan X, Wu P, Wang X, Zhou L, Tong Y, et al. Early Transmission Dynamics in Wuhan, China, of Novel Coronavirus-Infected Pneumonia. *New England Journal of Medicine*. 2020;382(13):1199-207.
14. Xiang Y-T, Yang Y, Li W, Zhang L, Zhang Q, Cheung T, et al. Timely mental health care for the 2019 novel coronavirus outbreak is urgently needed. *The Lancet Psychiatry*. 2020;7(3):228-9.
15. Daniel K, Wolfe CDA, Busch MA, McKeivitt C. What Are the Social Consequences of Stroke for Working-Aged Adults? *Stroke*. 2009;40(6):e431-e40.
16. Greenhalgh T, Knight M, A'Court C, Buxton M, Husain L. Management of post-acute covid-19 in primary care. *BMJ*. 2020;370:m3026.
17. NICE. Overview | COVID-19 rapid guideline: managing the long-term effects of COVID-19 | Guidance. 2020.
18. Davis HE, Assaf GS, McCorkell L, Wei H, Low RJ, Re'em Y, et al. Characterizing Long COVID in an International Cohort: 7 Months of Symptoms and Their Impact. *medRxiv*. 2020:2020.12.24.20248802.
19. Chen K-Y, Li T, Gong F-H, Zhang J-S, Li X-K. Predictors of Health-Related Quality of Life and Influencing Factors for COVID-19 Patients, a Follow-Up at One Month. *Frontiers in Psychiatry*. 2020;11(668).
20. Golics CJ, Basra MKA, Finlay AY, Salek S. The impact of disease on family members: a critical aspect of medical care. *Journal of the Royal Society of Medicine*. 2013;106(10):399-407.
21. COVID Symptom Study. How long does COVID-19 last? Kings College London 2020 [Available from: [https://covid.joinzoe.com/post/covid-long-term?fbclid=IwAR1RxIcmmdL-EFjh\\_aI-](https://covid.joinzoe.com/post/covid-long-term?fbclid=IwAR1RxIcmmdL-EFjh_aI-)].
22. Rimmer A. Covid-19: Impact of long term symptoms will be profound, warns BMA. *BMJ*. 2020;370:m3218.

- 1  
2  
3  
4  
5  
6  
7  
8  
9  
10  
11  
12  
13  
14  
15  
16  
17  
18  
19  
20  
21  
22  
23  
24  
25  
26  
27  
28  
29  
30  
31  
32  
33  
34  
35  
36  
37  
38  
39  
40  
41  
42  
43  
44  
45  
46  
47  
48  
49  
50  
51  
52  
53  
54  
55  
56  
57  
58  
59  
60
23. Wu KK, Chan SK, Ma TM. Posttraumatic stress, anxiety, and depression in survivors of severe acute respiratory syndrome (SARS). *J Trauma Stress*. 2005;18(1):39-42.
24. Mak IW, Chu CM, Pan PC, Yiu MG, Chan VL. Long-term psychiatric morbidities among SARS survivors. *Gen Hosp Psychiatry*. 2009;31(4):318-26.
25. Fu W, Wang C, Zou L, Guo Y, Lu Z, Yan S, et al. Psychological health, sleep quality, and coping styles to stress facing the COVID-19 in Wuhan, China. *Transl Psychiatry*. 2020;10(1):225-.
26. Marelli S, Castelnuovo A, Somma A, Castronovo V, Mombelli S, Bottoni D, et al. Impact of COVID-19 lockdown on sleep quality in university students and administration staff. *Journal of Neurology*. 2020.
27. Gualano MR, Lo Moro G, Voglino G, Bert F, Siliquini R. Effects of Covid-19 Lockdown on Mental Health and Sleep Disturbances in Italy. *Int J Environ Res Public Health*. 2020;17(13).
28. Raja A, Wood F, Joshi HB. The impact of urinary stone disease and their treatment on patients' quality of life: a qualitative study. *Urolithiasis*. 2020;48(3):227-34.
29. Caraballo C, Khera R, Jones PG, Decker C, Schulz W, Spertus JA, et al. Rates and Predictors of Patient Underreporting of Hospitalizations During Follow-Up After Acute Myocardial Infarction. *Circulation: Cardiovascular Quality and Outcomes*. 2020;13(7):e006231.
30. Szende A, Janssen B. Cross-Country Analysis of EQ-5D Data. In: Szende A, Janssen B, Cabases J, editors. *Self-Reported Population Health: An International Perspective based on EQ-5D*. Dordrecht: Springer Netherlands; 2014. p. 31-6.

Figure1 COVID-19 survivor response to EQ-5D-3L (n=735)

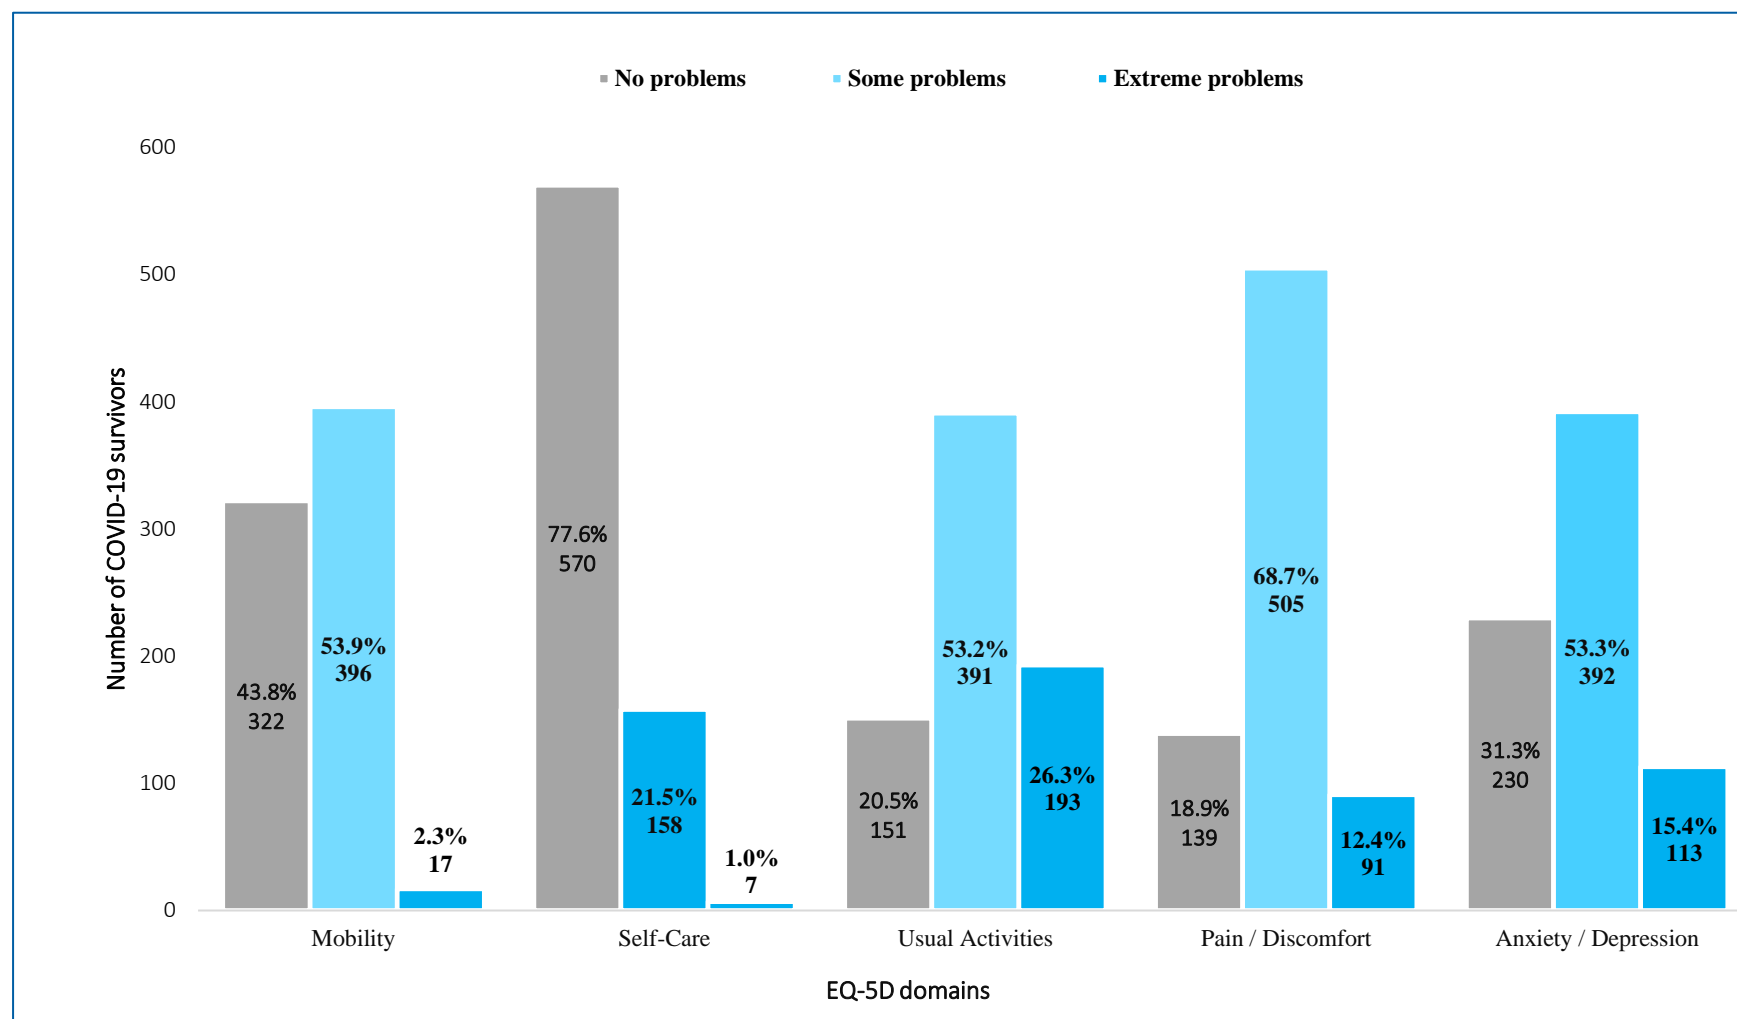



| Section/Topic             | Item # | Recommendation                                                                                                                                                                       | Page No  | Relevant text from the manuscript                  |
|---------------------------|--------|--------------------------------------------------------------------------------------------------------------------------------------------------------------------------------------|----------|----------------------------------------------------|
| <b>Title and abstract</b> | 1      | (a) Indicate the study's design with a commonly used term in the title or the abstract                                                                                               | 2        | Abstract                                           |
|                           |        | (b) Provide in the abstract an informative and balanced summary of what was done and what was found                                                                                  | 2        | Abstract page 1                                    |
| <b>Introduction</b>       |        |                                                                                                                                                                                      |          |                                                    |
| Background/rationale      | 2      | Explain the scientific background and rationale for the investigation being reported                                                                                                 | 3        | Introduction- paragraph 1, 2                       |
| Objectives                | 3      | State specific objectives, including any prespecified hypotheses                                                                                                                     | 4        | Introduction- paragraph 3                          |
| <b>Methods</b>            |        |                                                                                                                                                                                      |          |                                                    |
| Study design              | 4      | Present key elements of study design early in the paper                                                                                                                              | 4, 5     | Methods                                            |
| Setting                   | 5      | Describe the setting, locations, and relevant dates, including periods of recruitment, exposure, follow-up, and data collection                                                      | 4-5      | Methods-setting/ participants / procedure          |
| Participants              | 6      | (a) Give the eligibility criteria, and the sources and methods of selection of participants                                                                                          | 5        | Method-procedure                                   |
| Variables                 | 7      | Clearly define all outcomes, exposures, predictors, potential confounders, and effect modifiers. Give diagnostic criteria, if applicable                                             | 6        | Methods -outcome /exposure/Covariates/missing data |
| Data sources/ measurement | 8*     | For each variable of interest, give sources of data and details of methods of assessment (measurement). Describe comparability of assessment methods if there is more than one group | 6        | Methods-Measurements tools                         |
| Bias                      | 9      | Describe any efforts to address potential sources of bias                                                                                                                            | 7, 14-15 | Methods and Regression                             |
| Study size                | 10     | Explain how the study size was arrived at                                                                                                                                            |          | Study Size = Exploratory                           |
| Quantitative variables    | 11     | Explain how quantitative variables were handled in the analyses. If applicable, describe which groupings were chosen and why                                                         | 7        | Statistical analysis                               |
| Statistical methods       | 12     | (a) Describe all statistical methods, including those used to control for confounding                                                                                                | 7        |                                                    |
|                           |        | (b) Describe any methods used to examine subgroups and interactions                                                                                                                  | 7-17     | Statistical analysis and Tables 1-7                |
|                           |        | (c) Explain how missing data were addressed                                                                                                                                          | 7        | There were no missing data                         |
|                           |        | (d) If applicable, describe analytical methods taking account of sampling strategy                                                                                                   |          | Exploratory                                        |
|                           |        | (e) Describe any sensitivity analyses                                                                                                                                                |          | Not applicable                                     |

|    |                   |     |                                                                                                                                                                                                                |       |                                                                                                                                                                                                                                                        |
|----|-------------------|-----|----------------------------------------------------------------------------------------------------------------------------------------------------------------------------------------------------------------|-------|--------------------------------------------------------------------------------------------------------------------------------------------------------------------------------------------------------------------------------------------------------|
| 1  |                   |     |                                                                                                                                                                                                                |       |                                                                                                                                                                                                                                                        |
| 2  | <b>Results</b>    |     |                                                                                                                                                                                                                |       |                                                                                                                                                                                                                                                        |
| 3  | Participants      | 13* | (a) Report numbers of individuals at each stage of study—eg numbers potentially eligible, examined for eligibility, confirmed eligible, included in the study, completing follow-up, and analysed              | 7     | Results section                                                                                                                                                                                                                                        |
| 4  |                   |     | (b) Give reasons for non-participation at each stage                                                                                                                                                           |       | Not applicable                                                                                                                                                                                                                                         |
| 5  |                   |     | (c) Consider use of a flow diagram                                                                                                                                                                             |       | Not applicable                                                                                                                                                                                                                                         |
| 6  | Descriptive data  | 14* | (a) Give characteristics of study participants (eg demographic, clinical, social) and information on exposures and potential confounders                                                                       | 7-8   | Table 1 descriptive analysis                                                                                                                                                                                                                           |
| 7  |                   |     | (b) Indicate number of participants with missing data for each variable of interest                                                                                                                            |       | NA (no missing data)                                                                                                                                                                                                                                   |
| 8  | Outcome data      | 15* | Report numbers of outcome events or summary measures                                                                                                                                                           | 7     | Results and Tables/Figures                                                                                                                                                                                                                             |
| 9  | Main results      | 16  | (a) Give unadjusted estimates and, if applicable, confounder-adjusted estimates and their precision (e.g., 95% confidence interval). Make clear which confounders were adjusted for and why they were included | 7-17  | Results section-Table 3, 4 and 5. Multiple regression Tables 6 and 7                                                                                                                                                                                   |
| 10 |                   |     | (b) Report category boundaries when continuous variables were categorised                                                                                                                                      |       | Not Applicable                                                                                                                                                                                                                                         |
| 11 |                   |     | (c) If relevant, consider translating estimates of relative risk into absolute risk for a meaningful time period                                                                                               |       | Not Applicable                                                                                                                                                                                                                                         |
| 12 | Other analyses    | 17  | Report other analyses done—eg analyses of subgroups and interactions, and sensitivity analyses                                                                                                                 | 10-13 | Results – Sub group analysis- male /female; hospitalise for COVID-19/not hospitalised ; Pre-existing health condition / No pre-existing health condition; partner and Family member 's with COVID / Partner and family not having COVID Tables 3 and 4 |
| 13 |                   |     |                                                                                                                                                                                                                |       |                                                                                                                                                                                                                                                        |
| 14 |                   |     |                                                                                                                                                                                                                |       |                                                                                                                                                                                                                                                        |
| 15 |                   |     |                                                                                                                                                                                                                |       |                                                                                                                                                                                                                                                        |
| 16 |                   |     |                                                                                                                                                                                                                |       |                                                                                                                                                                                                                                                        |
| 17 |                   |     |                                                                                                                                                                                                                |       |                                                                                                                                                                                                                                                        |
| 18 |                   |     |                                                                                                                                                                                                                |       |                                                                                                                                                                                                                                                        |
| 19 |                   |     |                                                                                                                                                                                                                |       |                                                                                                                                                                                                                                                        |
| 20 |                   |     |                                                                                                                                                                                                                |       |                                                                                                                                                                                                                                                        |
| 21 |                   |     |                                                                                                                                                                                                                |       |                                                                                                                                                                                                                                                        |
| 22 |                   |     |                                                                                                                                                                                                                |       |                                                                                                                                                                                                                                                        |
| 23 |                   |     |                                                                                                                                                                                                                |       |                                                                                                                                                                                                                                                        |
| 24 |                   |     |                                                                                                                                                                                                                |       |                                                                                                                                                                                                                                                        |
| 25 |                   |     |                                                                                                                                                                                                                |       |                                                                                                                                                                                                                                                        |
| 26 |                   |     |                                                                                                                                                                                                                |       |                                                                                                                                                                                                                                                        |
| 27 |                   |     |                                                                                                                                                                                                                |       |                                                                                                                                                                                                                                                        |
| 28 |                   |     |                                                                                                                                                                                                                |       |                                                                                                                                                                                                                                                        |
| 29 |                   |     |                                                                                                                                                                                                                |       |                                                                                                                                                                                                                                                        |
| 30 |                   |     |                                                                                                                                                                                                                |       |                                                                                                                                                                                                                                                        |
| 31 |                   |     |                                                                                                                                                                                                                |       |                                                                                                                                                                                                                                                        |
| 32 |                   |     |                                                                                                                                                                                                                |       |                                                                                                                                                                                                                                                        |
| 33 | <b>Discussion</b> |     |                                                                                                                                                                                                                |       |                                                                                                                                                                                                                                                        |
| 34 | Key results       | 18  | Summarise key results with reference to study objectives                                                                                                                                                       | 18-19 | 16-17                                                                                                                                                                                                                                                  |
| 35 | Limitations       | 19  | Discuss limitations of the study, taking into account sources of potential bias or imprecision. Discuss both direction and magnitude of any potential bias                                                     | 20    | Strengths and Limitation section                                                                                                                                                                                                                       |
| 36 | Interpretation    | 20  | Give a cautious overall interpretation of results considering objectives, limitations, multiplicity of analyses, results from similar studies, and other relevant evidence                                     | 20-21 | Strengths and limitation / comparison with other studies                                                                                                                                                                                               |
| 37 |                   |     |                                                                                                                                                                                                                |       |                                                                                                                                                                                                                                                        |
| 38 |                   |     |                                                                                                                                                                                                                |       |                                                                                                                                                                                                                                                        |
| 39 |                   |     |                                                                                                                                                                                                                |       |                                                                                                                                                                                                                                                        |
| 40 |                   |     |                                                                                                                                                                                                                |       |                                                                                                                                                                                                                                                        |
| 41 |                   |     |                                                                                                                                                                                                                |       |                                                                                                                                                                                                                                                        |
| 42 |                   |     |                                                                                                                                                                                                                |       |                                                                                                                                                                                                                                                        |
| 43 |                   |     |                                                                                                                                                                                                                |       |                                                                                                                                                                                                                                                        |
| 44 |                   |     |                                                                                                                                                                                                                |       |                                                                                                                                                                                                                                                        |
| 45 |                   |     |                                                                                                                                                                                                                |       |                                                                                                                                                                                                                                                        |
| 46 |                   |     |                                                                                                                                                                                                                |       |                                                                                                                                                                                                                                                        |



1  
2  
3  
4  
5  
6  
7  
8  
9  
10  
11  
12  
13  
14  
15  
16  
17  
18  
19  
20  
21  
22  
23  
24  
25  
26  
27  
28  
29  
30  
31  
32  
33  
34  
35  
36  
37  
38  
39  
40  
41  
42  
43  
44  
45  
46

|                          |    |                                                                                                                                                                |    |                                   |
|--------------------------|----|----------------------------------------------------------------------------------------------------------------------------------------------------------------|----|-----------------------------------|
| Generalisability         | 21 | Discuss the generalisability (external validity) of the study results                                                                                          | 20 | Strengths and limitations section |
| <b>Other information</b> |    |                                                                                                                                                                |    |                                   |
| Funding                  | 22 | Give the source of funding and the role of the funders for the present study and, if applicable, for the original study on which the present article is based. | 24 | Funding section                   |

**STROBE 2007 (v4) Statement—Checklist of items that should be included in reports of *cross-sectional studies***

\*Give information separately for cases and controls in case-control studies and, if applicable, for exposed and unexposed groups in cohort and cross-sectional studies.

**Note:** An Explanation and Elaboration article discusses each checklist item and gives methodological background and published examples of transparent reporting. The STROBE checklist is best used in conjunction with this article (freely available on the Web sites of PLoS Medicine at <http://www.plosmedicine.org/>, Annals of Internal Medicine at <http://www.annals.org/>, and Epidemiology at <http://www.epidem.com/>). Information on the STROBE Initiative is available at [www.strobe-statement.org](http://www.strobe-statement.org).

# BMJ Open

## Measuring the impact of COVID-19 on the quality of life of the survivors, partners and family members: A cross-sectional international online survey

|                                 |                                                                                                                                                                                                                                                                                                                                                                                                                                                                                                         |
|---------------------------------|---------------------------------------------------------------------------------------------------------------------------------------------------------------------------------------------------------------------------------------------------------------------------------------------------------------------------------------------------------------------------------------------------------------------------------------------------------------------------------------------------------|
| Journal:                        | <i>BMJ Open</i>                                                                                                                                                                                                                                                                                                                                                                                                                                                                                         |
| Manuscript ID                   | bmjopen-2020-047680.R2                                                                                                                                                                                                                                                                                                                                                                                                                                                                                  |
| Article Type:                   | Original research                                                                                                                                                                                                                                                                                                                                                                                                                                                                                       |
| Date Submitted by the Author:   | 19-Apr-2021                                                                                                                                                                                                                                                                                                                                                                                                                                                                                             |
| Complete List of Authors:       | Shah, Rubina ; Cardiff University School of Medicine, Division of Infection and Immunity<br>Ali, Faraz ; Cardiff University School of Medicine, Division of Infection and Immunity<br>Nixon, Stuart; Multiple Sclerosis Society<br>Ingram, John; Cardiff University School of Medicine, Division of Infection and Immunity<br>Salek, Sam; University of Hertfordshire; Institute of Medicines Development<br>Finlay, Andrew ; Cardiff University School of Medicine, Division of Infection and Immunity |
| <b>Primary Subject Heading</b>: | Public health                                                                                                                                                                                                                                                                                                                                                                                                                                                                                           |
| Secondary Subject Heading:      | Infectious diseases                                                                                                                                                                                                                                                                                                                                                                                                                                                                                     |
| Keywords:                       | COVID-19, Public health < INFECTIOUS DISEASES, Infection control < INFECTIOUS DISEASES                                                                                                                                                                                                                                                                                                                                                                                                                  |
|                                 |                                                                                                                                                                                                                                                                                                                                                                                                                                                                                                         |

SCHOLARONE™  
Manuscripts



I, the Submitting Author has the right to grant and does grant on behalf of all authors of the Work (as defined in the below author licence), an exclusive licence and/or a non-exclusive licence for contributions from authors who are: i) UK Crown employees; ii) where BMJ has agreed a CC-BY licence shall apply, and/or iii) in accordance with the terms applicable for US Federal Government officers or employees acting as part of their official duties; on a worldwide, perpetual, irrevocable, royalty-free basis to BMJ Publishing Group Ltd ("BMJ") its licensees and where the relevant Journal is co-owned by BMJ to the co-owners of the Journal, to publish the Work in this journal and any other BMJ products and to exploit all rights, as set out in our [licence](#).

The Submitting Author accepts and understands that any supply made under these terms is made by BMJ to the Submitting Author unless you are acting as an employee on behalf of your employer or a postgraduate student of an affiliated institution which is paying any applicable article publishing charge ("APC") for Open Access articles. Where the Submitting Author wishes to make the Work available on an Open Access basis (and intends to pay the relevant APC), the terms of reuse of such Open Access shall be governed by a Creative Commons licence – details of these licences and which [Creative Commons](#) licence will apply to this Work are set out in our licence referred to above.

Other than as permitted in any relevant BMJ Author's Self Archiving Policies, I confirm this Work has not been accepted for publication elsewhere, is not being considered for publication elsewhere and does not duplicate material already published. I confirm all authors consent to publication of this Work and authorise the granting of this licence.

1  
2  
3 **Measuring the impact of COVID-19 on the quality of life of the survivors, partners and**  
4 **family members: A cross-sectional international online survey**  
5

6 Rubina M Shah<sup>1</sup>, Faraz M Ali<sup>1</sup>, Stuart Nixon<sup>2</sup>, John R Ingram<sup>1</sup>, Sam S Salek<sup>3,4</sup>, Andrew Y Finlay<sup>1</sup>  
7  
8

9 <sup>1</sup>Division of Infection and Immunity, Cardiff University, School of Medicine, Cardiff, UK,

10 <sup>2</sup>Ambassador, Multiple Sclerosis Society, Cardiff, UK.

11 <sup>3</sup>School of Life & Medical Sciences, University of Hertfordshire, Hatfield, UK, <sup>4</sup>Institute of  
12 Medicines Development, Cardiff, UK.  
13  
14

15  
16 **Corresponding Author**

17 Shah RM<sup>1</sup> email: [ShahR45@cardiff.ac.uk](mailto:ShahR45@cardiff.ac.uk)

18 **ORCID:** 0000-0001-8158-712X  
19

20  
21 **Co-authors**

22 Ali FM<sup>1</sup> email: [alifm@cardiff.ac.uk](mailto:alifm@cardiff.ac.uk)

23 **ORCID:** 0000-0002-4184-2023  
24

25 Nixon SJ<sup>2</sup> email: [stuart.nixon@mssociety.org.uk](mailto:stuart.nixon@mssociety.org.uk)  
26

27 Ingram JR<sup>1</sup> email: [ingramjr@cardiff.ac.uk](mailto:ingramjr@cardiff.ac.uk)

28 **ORCID:** 0000-0002-5257-1142  
29

30 Salek MS<sup>3,4</sup> email: [m.s.salek@herts.ac.uk](mailto:m.s.salek@herts.ac.uk)

31 **ORCID:** 0000 0002 4612 5699  
32

33 Finlay AY<sup>1</sup> email: [finlayay@cardiff.ac.uk](mailto:finlayay@cardiff.ac.uk)

34 **ORCID:** 0000 0003 2143 1646  
35  
36  
37  
38  
39  
40  
41  
42  
43  
44  
45  
46  
47  
48  
49  
50  
51  
52  
53  
54  
55  
56  
57  
58  
59  
60

**Word count: 4,842**

## ABSTRACT

### Objective:

This study aimed to measure the impact of COVID-19 on the quality of life (QoL) of survivors and their partners and family members.

### Design and Setting:

A prospective cross-sectional global online survey using social media.

### Participants:

COVID-19 patients and partners or family members (age  $\geq 18$  years).

### Intervention:

Online survey from June to August 2020.

### Main outcome measure:

The EQ-5D-3L to measure the QoL of survivors of COVID-19, and the Family Reported Outcome Measure (FROM-16) to assess the impact on their partner/family member's QoL.

### Results:

The survey was completed by 735 COVID-19 survivors (mean age=48 years; females=563) at a mean of 12.8 weeks after diagnosis and by 571 partners and 164 family members (n=735; mean age=47 years; females=246) from Europe (50.6%), North America (38.5%) and rest of the world (10.9%). The EQ-5D mean score for COVID-19 survivors was 8.65 (SD=1.9, median=9; range=6-14). 81.1% (596/735) reported pain and discomfort, 79.5% (584/735) problems with usual activities, 68.7% (505/735) anxiety and depression and 56.2% (413/735) problems with mobility. Hospitalised survivors (20%, n=148) and survivors with existing health conditions (30%, n=227) reported significantly more problems with mobility and usual activities ( $p < 0.05$ ), with hospitalised also experiencing more impact on self-care ( $p \leq 0.001$ ).

Among 735 partners and family members, the mean FROM-16 score (maximum score = highest impact = 32) was 15 (median=15, range=0-32). 93.6% (688/735) reported being worried, 81.7% (601/735) frustrated, 78.4% (676/735) sad, 83.3% (612/735) reported impact on their family activities, 68.9% (507/735) on sleep and 68.1% (500/735) on their sex life.

### Conclusion:

COVID-19 survivors reported a major persisting impact on their physical and psychosocial health. The lives of their partners and other family members were also severely affected. There is a need for a holistic support system sensitive to the needs of COVID-19 survivors and their family members who experience a major "secondary burden".

### Keywords

COVID-19; Long COVID, family impact; partner impact; patient impact; EQ-5D; quality of life; FROM-16; Family- Reported Outcome Measure.

### Strengths and Limitations of this study

- This study provides evidence of the impact on quality of life (QoL) of 'Long COVID' in survivors of COVID-19.
- This study fills an important knowledge gap in measuring the impact of survivors' COVID-19 on the QoL of partners and other family members.
- Large sample size, heterogenous population and use of validated tools to assess QoL impact
- The study was open to COVID survivors and their family members internationally, but only those active on social media who could read and understand English completed the survey.
- Causal relationships cannot be established among the study variables as the study was cross-sectional.

## INTRODUCTION

The COVID-19 pandemic is causing profound changes across the world, but there is little information on its physical and psychosocial impact on survivors and their families. Despite the need (1) for information on the lived experience of infected individuals and their family members, there are only sparse data available.

It is important to ascertain COVID-19's immediate and persisting (Long COVID) impact on those affected and on their families in order to aid healthcare workers and government agencies to better support them. The understanding of how a person's health condition impacts the quality of life (QoL) of other family members has increased over the last decade (2).

The aim of this study was to assess the impact of COVID-19 on survivors and their family members based on their lived experience of COVID-19 using validated QoL instruments administered using online social media platforms.

## **METHODS**

### **Settings and participants**

This was a prospective cross-sectional global online survey, using an anonymous online questionnaire. The survey was carried out using <https://www.onlinesurveys.ac.uk/> on a Jisc platform (3). The survey was distributed through social media platforms including Facebook, Twitter, LinkedIn, WhatsApp and Reddit.

### **Procedure**

Ethics approval was granted by the Cardiff University School of Medicine Research Ethics Committee (SMREC 20/60). Study participants were provided with information about the study via a link in the survey to a "Participant Information Sheet" where they were informed that participation was voluntary and their data would remain anonymous. Those who decided to take part gave informed consent at the beginning of the survey. Data collection took place from 30th May to 30th August 2020.

The study was only open to individuals who were diagnosed with COVID-19 and their family member or partner, adults aged 18 years or above who could read and understand English, and who were able to give written consent and complete the questionnaire using an electronic device. Participants were excluded if they had not had COVID-19 or if they were less than 18 years of age.

### **Survey development**

The survey included two QoL questionnaires: EuroQol group 5 Dimensions 3 level (EQ-5D-3L) and Family Reported Outcome Measure (FROM-16). There were additional socio-demographic questions such as responder's age, gender and country of residence (Table 1). A pre-test draft survey was piloted during May 2020 in 20 individuals without COVID-19 across several countries including the UK, India, and the UAE. Views were also sought from the study research partners, a patient and two family members. The survey questions were revised based on the collective feedback.

### **Patient and public involvement**

1 Two patients and one family member were involved as integral study research partners, one of whom  
2  
3 (SJN) is a co-author. They were involved in reviewing the study protocol, drafting the survey,  
4  
5 reviewing the manuscript and providing suggestions from the patient and family perspective.  
6  
7

### 8 **Survey structure**

9  
10 The survey had two sections. Section one was completed by the COVID-19 survivor. Each survivor  
11  
12 provided basic demographic details and provided EQ-5D-3L responses. Section two was completed  
13  
14 by the partner or a family member of the survivor who provided basic demographic details and  
15  
16 completed FROM-16. The survey did not specify whether this should be someone the patient lives  
17  
18 with or whether it could be any close relation; however, the family member of the COVID-19  
19  
20 survivor was asked to specify their relationship to the patient.  
21  
22

### 23 **Measurement tools**

24  
25 The EQ-5D-3 L is a self-reported generic health-related QoL (HRQoL) instrument that specifically  
26  
27 addresses health status (4). It consists of five questions on mobility, self-care, usual activities, pain  
28  
29 and discomfort, and anxiety and depression with 3-point response categories (1= no problems, 2=  
30  
31 some problems and 3= serious or extreme problems). The EQ-VAS component of EQ-5D-3L asks  
32  
33 respondents to rate their overall health status from 0 (worst imaginable health) to 100 (best imaginable  
34  
35 health). In this study, for simplicity throughout this manuscript, we refer to EQ-5D-3L as  
36  
37 'EQ-5D'.  
38  
39  
40  
41  
42

43 The FROM-16 measures the impact of a patient's disease on the QoL of a family member or partner  
44  
45 of a patient (5). The FROM-16 comprises 16 items with 3-point response options for each: not at all  
46  
47 (scoring 0), a little (1) and a lot (2), with a total score range of 0 - 32. The higher the score, the greater  
48  
49 the negative impact on the family member's QoL. The 16 items are divided into two domains:  
50  
51 Emotional (six items, maximum score 12) and Personal and Social Life (ten items, maximum score  
52  
53 20). The FROM-16 has proven psychometric properties, a rapid completion time of two minutes (5)  
54  
55 and translations are available in several languages (6). A generic measure, the FROM-16 has been  
56  
57 validated across all areas of medicine (5-7) and is therefore suitable for measuring the impact of  
58  
59  
60



1 COVID-19 on the partner and family members of those affected. As it is a generic measure, data  
2 generated can be compared with data from other medical conditions.  
3  
4

5  
6 **Outcome:** The impact of COVID-19 on the quality of life of survivors and their partners and family  
7 members.  
8  
9

10  
11 **Exposure:** COVID-19 infection of the participant or of the family member.  
12  
13

14 **Covariates:** The covariates included hospital stay due to COVID-19 infection, existing health  
15 condition of survivors, number of weeks since COVID-19 diagnosis, partners and family members  
16 diagnosed with COVID-19, family members' relationship to survivors, country of residence, age and  
17 sex of family members and survivors. All the covariates, including hospitalisation, existing conditions  
18 and number of weeks since COVID-19 diagnosis were based on self-report.  
19  
20  
21  
22  
23

24  
25 **Missing data:** There were no missing data, but two responses were ambiguous for one of the  
26 variables (EQ-VAS) and were excluded from the analysis.  
27  
28  
29

### 30 **Statistical analysis**

31  
32 Descriptive statistics (i.e. mean, standard deviation, median, inter-quartile range) were performed for  
33 all variables. The Shapiro–Wilk test was used to examine normal distribution of continuous variables.  
34 The required assumptions for normal distribution were not met. Consequently, data analysis employed  
35 non-parametric statistical method. Both the EQ-5D-3L and the FROM-16 scores were treated in the  
36 analysis as dependent variables. The EQ-VAS component of EQ-5D was examined separately as a  
37 dependent variable. To determine differences between groups defined by each outcome, chi-square  
38 tests (when appropriate, Fisher's exact tests) and Mann-Whitney U tests were computed. These  
39 bivariate comparisons were based on COVID-19 survivor's characteristics (gender, existing health  
40 condition, and hospitalisation) and family member characteristics (gender and whether diagnosed with  
41 COVID-19). Spearman's rank correlation coefficient and multiple regression analysis were conducted  
42 to understand the effect of independent variables (i.e. predictors: survivor age, existing health  
43 condition, hospital stay for COVID-19, number of weeks since COVID-19 diagnosis, survivor  
44 gender) on the EQ-5D outcomes. Similarly, these analyses were conducted to understand the effect of  
45  
46  
47  
48  
49  
50  
51  
52  
53  
54  
55  
56  
57  
58  
59  
60

independent variables (EQ-5D score, age family member, number of weeks since COVID-19 diagnosis, family member gender, whether family member also had COVID-19, relationship to survivor, survivor age, survivor existing health condition, survivor hospital stay for COVID-19) on the FROM-16 outcomes. Statistical Product and Service Solutions SPSS® (version 25) was used and the probability of type I error was set at  $p < 0.05$ .

## RESULTS

### Sociodemographic characteristics of the study participants

A total of 1,254 respondents consented to participate in the survey: 765 completed both sections. Thirty responses were excluded as the respondents were below the age of 18 years. The final analysis included 735 COVID-19 survivors and their family members/partner from Europe (50.6%), North America (38.5%) and the rest of the world (10.9%) (Table 1).

**Table 1** Sociodemographic characteristics of the study participants

| Variables                                | Categories                         | N (%) or N(SD) |
|------------------------------------------|------------------------------------|----------------|
| <b>COVID-19 Survivors (n=735)</b>        |                                    |                |
| Gender                                   | Male                               | 172 (23.4%)    |
|                                          | Female                             | 563 (76.6%)    |
| Age (years)                              | Mean (SD)                          | 47.77 (11.656) |
|                                          | Median                             | 48.00          |
|                                          | Range                              | 19-85          |
|                                          | Range (IQR)                        | 19-85 (16)     |
| Number of weeks since COVID-19 diagnosis | Mean (SD)                          | 12.76 (6.104)  |
|                                          | Median                             | 13.00          |
|                                          | Range                              | 1-36           |
|                                          | Range (IQR)                        | 1-36 (8)       |
|                                          |                                    | ≥4 weeks       |
|                                          | 5-11 weeks                         | 170 (23.1%)    |
|                                          | ≥12 weeks                          | 467 (63.5%)    |
| Occupation                               | Unemployed                         | 19 (2.6%)      |
|                                          | In paid work                       | 538 (73.2%)    |
|                                          | In education or training           | 26 (3.5%)      |
|                                          | In unpaid work                     | 7 (1%)         |
|                                          | Work in the home/manage the family | 60 (8.2%)      |

|    |                               |                          |                |
|----|-------------------------------|--------------------------|----------------|
| 1  |                               | Retired                  | 66 (9%)        |
| 2  |                               | Rather not say           | 19 (2.6%)      |
| 3  |                               |                          |                |
| 4  |                               |                          |                |
| 5  | Existing health               | No                       | 508 (69.1%)    |
| 6  | conditions                    | Yes                      | 227 (30.9%)    |
| 7  |                               |                          |                |
| 8  | Hospitalised for COVID-19     | No                       | 587 (79.9%)    |
| 9  |                               | Yes                      | 148 (20.1%)    |
| 10 |                               |                          |                |
| 11 |                               |                          |                |
| 12 | Regions                       | Europe                   | 372 (50.6%)    |
| 13 |                               | North America            | 283 (38.5%)    |
| 14 |                               | Rest of the World        | 80 (10.9%)     |
| 15 | <b>Family members (N=735)</b> |                          |                |
| 16 | Gender                        | Male                     | 489 (66.5%)    |
| 17 |                               | Female                   | 246 (33.5%)    |
| 18 |                               |                          |                |
| 19 |                               |                          |                |
| 20 | Age (years)                   | Mean (SD)                | 47.43 (13.582) |
| 21 |                               | Median                   | 48.00          |
| 22 |                               | Range                    | 18-87          |
| 23 |                               |                          |                |
| 24 |                               |                          |                |
| 25 | Occupation                    | Unemployed               | 42 (5.7%)      |
| 26 |                               | In paid work             | 530 (72.1%)    |
| 27 |                               | In education or training | 29 (3.9%)      |
| 28 |                               | In unpaid work           | 18 (2.4%)      |
| 29 |                               | Retired                  | 95 (12.9%)     |
| 30 |                               | Rather not say           | 21 (2.9%)      |
| 31 |                               |                          |                |
| 32 |                               |                          |                |
| 33 | Relationship to the person    | Spouse/Partner           | 571 (77.7%)    |
| 34 | affected with COVID-19        | Parents                  | 48 (6.5%)      |
| 35 |                               | Son/Daughter             | 77 (10.5%)     |
| 36 |                               | Brother/Sister           | 24 (3.3%)      |
| 37 |                               | Other                    | 15 (2%)        |
| 38 |                               |                          |                |
| 39 |                               |                          |                |
| 40 | Diagnosed with COVID-19       | No                       | 380 (51.7%)    |
| 41 |                               | Yes                      | 355 (48.3%)    |

Of the 735 COVID-19 survivors, 76.6% were females (mean and median age=48 years) and 73.3% were in paid employment. The mean time since COVID-19 symptoms started was 12.8 weeks (median=13 weeks). In 86.6% (n=637) > 4 weeks had elapsed since COVID-19 symptoms started and in 63.5% (n=467) >12 weeks had elapsed. Of the family members (mean age=48 years, median=47 years), 66.5 % were male and 72.1% were in paid employment. Most of the family members were partners (77.7%), followed by sons and daughters (10.5%) and parents (6.5%). In addition, 48.3 % of the family members had also contracted COVID-19 (Table 1).

## Quality of life impact of COVID-19 on survivors

The EQ-5D mean score was 1.73 (SD=0.39) with the 'usual activities' item scoring the highest (mean=2.06, max 3) followed by pain/discomfort (1.93) and anxiety/depression (1.84). The mean score of the visual analogue part of EQ-5D was 56 (SD=22.94) (Table 2).

**Table 2** Mean scores of EQ-5D and FROM-16 (n=735)

| Scale                             | Mean (SD)          | Median (interquartile range) | Range |
|-----------------------------------|--------------------|------------------------------|-------|
| <b>EQ-5D-3L domains</b>           |                    |                              |       |
| Overall                           | 8.65 (1.97)        | 9 (3)                        | 6-14  |
| Mobility                          | 1.59 (0.54)        | 2 (1)                        | 1-3   |
| Self-Care                         | 1.23 (0.45)        | 1 (0)                        | 1-3   |
| Usual Activities                  | <b>2.06</b> (0.68) | 2 (1)                        | 1-3   |
| Pain / Discomfort                 | <b>1.93</b> (0.56) | 2 (0)                        | 1-3   |
| Anxiety / Depression              | <b>1.84</b> (0.67) | 2 (1)                        | 1-3   |
| EQ-VAS n(733)                     | 55.83 (22.94)      | 60(35)                       | 3-100 |
| <b>FROM-16</b>                    |                    |                              |       |
| Overall                           | 15.00 (8.05)       | 15 (13)                      | 0-32  |
| <b>Emotional Domain</b>           |                    |                              |       |
| Worried                           | <b>1.43</b> (0.61) | 1 (1)                        | 0-3   |
| Angry                             | 0.75 (0.73)        | 1(1)                         | 0-3   |
| Sad                               | <b>1.05</b> (0.70) | 1 (1)                        | 0-3   |
| Frustrated                        | <b>1.24</b> (0.74) | 1 (1)                        | 0-3   |
| Talking about thoughts            | 0.84 (0.79)        | 1 (1)                        | 0-3   |
| Difficulty caring                 | 0.81 (0.76)        | 1 (1)                        | 0-3   |
| <b>Personal and Social Domain</b> |                    |                              |       |
| Time for self                     | 0.74 (0.76)        | 1 (1)                        | 0-3   |
| Everyday travel                   | 0.63 (0.78)        | 0 (1)                        | 0-3   |
| Eating habits                     | 0.65 (0.73)        | 0 (1)                        | 0-3   |
| Family activities                 | <b>1.26</b> (0.73) | 1 (1)                        | 0-3   |
| Holiday                           | <b>1.10</b> (0.88) | 1 (2)                        | 0-3   |
| Sex life                          | <b>1.09</b> (0.85) | 1 (2)                        | 0-3   |
| Work or study                     | 0.84 (0.79)        | 1 (1)                        | 0-3   |
| Family Relationship               | 0.73 (0.76)        | 1 (1)                        | 0-3   |
| Family expenses                   | 0.83 (0.82)        | 1 (2)                        | 0-3   |
| Sleep                             | <b>1.01</b> (0.79) | 1(2)                         | 0-3   |

Of the five dimensions of EQ-5D, 'pain and discomfort' was the impact most frequently reported (81.1%; 68.7 % some problems and 12.4% extreme problems), followed by usual activities (79.5%; 53.2% and 26.3%) and anxiety and depression (68.7%; 53.3% and 15.4%) (Figure 1). There was a

1 significant gender difference for 'mobility' and for 'pain and discomfort' ( $p \leq 0.05$ ) with females  
2  
3 being more impacted than males (Table 3).  
4

5  
6 Although existing health conditions were self-reported and severity was not stated, survivors with  
7  
8 existing health conditions did not appear to differ from those without such conditions except for  
9  
10 mobility  $p \leq 0.05$ ) (Table 3). Having an existing health condition was not a clear predictor of impact on  
11  
12 the family member/partner's QoL.. There was a significant difference between the survivors who had  
13  
14 been hospitalised for COVID-19 (20%) and those who had not, with the hospitalised survivors being  
15  
16 more severely affected across mobility, self-care ( $p \leq 0.001$ ) and usual activities ( $p \leq 0.02$ ) (Table 3).  
17

18  
19 There were significant differences in EQ-5D mean scores between survivors with respect to number  
20  
21 of weeks since COVID-19 diagnosis ( $p < 0.001$ ). Mean EQ-5D scores of survivors having COVID-19  
22  
23 symptoms for up to 4 weeks was 8.03 (SD=1.97), 5-11 weeks was 8.3 (SD=2.13) and 12 weeks and  
24  
25 above was 8.9 (SD=1.86).  
26  
27  
28  
29  
30  
31  
32  
33  
34  
35  
36  
37  
38  
39  
40  
41  
42  
43  
44  
45  
46  
47  
48  
49  
50  
51  
52  
53  
54  
55  
56  
57  
58  
59  
60

, Table 3 Comparisons † of EQ-5D scores for gender, existing health condition and hospitalisation

| EQ-5D domain         | Gender       |                | p-value**    | Existing health condition |            | p-value**    | Hospitalised for COVID-19 |            | p-value**     |
|----------------------|--------------|----------------|--------------|---------------------------|------------|--------------|---------------------------|------------|---------------|
|                      | Mean score   |                |              | Mean score                |            |              | Mean score                |            |               |
|                      | Male (n=172) | Female (n=563) |              | Yes (n=227)               | No (n=508) |              | Yes (n=148)               | No (n=587) |               |
| Overall              | 8.33         | 8.74           | <b>0.036</b> | 8.89                      | 8.54       | <b>0.012</b> | 9.17                      | 8.51       | <b>0.001</b>  |
| Mobility             | 1.51         | 1.61           | <b>0.037</b> | 1.67                      | 1.55       | <b>0.006</b> | 1.75                      | 1.54       | <b>0.0001</b> |
| Self-Care            | 1.22         | 1.24           | 0.602        | 1.28                      | 1.21       | 0.053        | 1.36                      | 1.20       | <b>0.0001</b> |
| Usual Activities     | 1.97         | 2.08           | 0.065        | 2.14                      | 2.02       | <b>0.034</b> | 2.19                      | 2.02       | <b>0.009</b>  |
| Pain / Discomfort    | 1.82         | 1.97           | <b>0.002</b> | 1.93                      | 1.94       | 0.989        | 1.99                      | 1.92       | 0.141         |
| Anxiety / Depression | 1.81         | 1.85           | 0.611        | 1.88                      | 1.82       | 0.289        | 1.88                      | 1.83       | 0.427         |

† Mann Whitney U test

\*\*p values were calculated using mean rank scores but mean scores are presented here for ease of understanding.

## Quality of life impact of COVID-19 on family members

The mean FROM-16 score was 15, reflecting the extent of the impact of the survivors' COVID-19 on the HRQoL of their family members (Table 2). The mean score of each of the 16 items is given in Table 2 with 'Feeling worried' scoring highest (1.46) followed by family activities, frustration, holiday, and sex life (1.26, 1.24, 1.10 and 1.09, respectively) (Table 2). Of the FROM-16 items, the feeling of being worried was most frequently reported (93.6%; 44.6% a little, 49% a lot), followed by family activities (83.3%; 41% , 42.3%), feeling of frustration (81.7%; 39.7% , 42% ), feeling sad (78.4%; 51.2%, 27.2 %), sleep (68.9%; 37.1%, 31.8 %) and sex life (68.1%; 26.7%, 41.4%) (Figure 2).

There was a significant gender difference among family members, with females feeling more sad, experiencing more impact on everyday travel ( $p \leq 0.01$ ) and on their sleep  $p \leq 0.05$ ). The impact on sex life was experienced significantly more by males than females ( $p \leq 0.001$ ) (Table 4).

**Table 4** Comparisons of FROM-16 scores for gender and for whether diagnosed with COVID-19 (n=735)

| FROM-16 Items          | Gender          |                   | p-value**    | Diagnosed with COVID-19 |               | p-value**    |
|------------------------|-----------------|-------------------|--------------|-------------------------|---------------|--------------|
|                        | Mean score      |                   |              | Mean score              |               |              |
|                        | Male<br>(n=489) | Female<br>(n=246) |              | Yes<br>(n=355)          | No<br>(n=380) |              |
| Overall                | 14.81           | 15.36             | 0.401        | 15.74                   | 14.32         | <b>0.017</b> |
| Worried                | 1.40            | 1.48              | 0.068        | 1.46                    | 1.39          | 0.135        |
| Angry                  | 0.73            | 0.79              | 0.332        | 0.77                    | 0.74          | 0.519        |
| Sad                    | 1.00            | 1.16              | <b>0.004</b> | 1.09                    | 1.03          | 0.225        |
| Frustrated             | 1.23            | 1.26              | 0.569        | 1.30                    | 1.18          | 0.054        |
| Talking about thoughts | 0.83            | 0.87              | 0.651        | 0.89                    | 0.80          | 0.132        |
| Difficulty caring      | 0.79            | 0.85              | 0.324        | 0.81                    | 0.80          | 0.847        |
| Time for self          | 0.70            | 0.83              | <b>0.036</b> | 0.78                    | 0.71          | 0.164        |
| Everyday travel        | 0.58            | 0.72              | <b>0.048</b> | 0.64                    | 0.62          | 0.874        |
| Eating habits          | 0.64            | 0.67              | 0.565        | 0.72                    | 0.59          | <b>0.015</b> |
| Family activities      | 1.28            | 1.21              | 0.144        | 1.32                    | 1.20          | <b>0.041</b> |
| Holiday                | 1.10            | 1.10              | 0.992        | 1.17                    | 1.03          | <b>0.030</b> |
| Sex life               | 1.22            | 0.84              | <b>0.000</b> | 1.17                    | 1.03          | <b>0.035</b> |
| Work or study          | 0.83            | 0.87              | 0.485        | 0.92                    | 0.77          | <b>0.013</b> |
| Family relationships   | 0.69            | 0.79              | 0.109        | 0.75                    | 0.70          | 0.281        |
| Family expenses        | 0.81            | 0.87              | 0.367        | 0.84                    | 0.83          | 0.759        |
| Sleep                  | 0.98            | 1.07              | 0.138        | 1.12                    | 0.90          | <b>0.000</b> |

<sup>†</sup>Mann Whitney U test;

\*\*p values were calculated using mean rank scores but mean scores are presented here for ease of understanding.

1 Those with a COVID-19 history experienced a greater impact on eating habits, work and study,  
2 family activities, holiday ( $p \leq 0.05$ ), sex life and sleep ( $p \leq 0.001$ ). There were no significant differences  
3 for the remaining 10 items of FROM-16 (Table 4).  
4  
5  
6

7  
8 There were significant differences in FROM-16 mean scores between family members of survivors  
9 with respect to onset of COVID-19 symptoms ( $p < 0.01$ ). Mean FROM-16 scores of family members  
10 of survivors having COVID-19 symptoms for up to 4 weeks was 16.11 (SD=7.35), 5-11 weeks was  
11 13.31 (SD=7.77) and 12 weeks and above was 15.38 (SD=8.21).  
12  
13  
14  
15

### 16 **Relationship between the quality of life of survivors and their family members**

17  
18 There were significant positive correlations between the EQ-5D score and the survivors' gender,  
19 hospital stay, existing health condition and number of weeks since COVID-19 diagnosis ( $p < 0.05$ ,  
20  $p < 0.001$ ) (Table 5).  
21  
22  
23  
24  
25

26  
27 There was a significant positive association between the family members' FROM-16 scores and the  
28 survivors' EQ-5D scores ( $p < 0.001$ ) (Tables 5) and a significant negative association between  
29 FROM-16 scores and the family members' age, survivors' age and EQ-VAS scores ( $p < 0.05$ ).  
30  
31  
32

33  
34 The EQ-VAS scores showed a significant inverse relationship with EQ-5D ( $p < 0.01$ ). However, other  
35 variables such as hospital stay, existing health condition and gender (being female) were associated  
36 with lower EQ-VAS scores ( $p < 0.05$ ), that is, lower health status (Table 5).  
37  
38  
39  
40

### 41 **Can quality of life predict outcomes?**

42  
43 The results of multiple regression analyses indicated that survivors' demographics, number of weeks  
44 since COVID-19 diagnosis and hospital stay were significant predictors of the extent of impact on  
45 QoL of the survivor ( $p=0.001$ ) while the survivors' existing health condition was not a predictor  
46 (Tables 6). Inclusion of variables such as EQ-5D scores, family members' COVID-19 history, family  
47 members' gender and relationship to the survivor in the model predicted family reported outcomes  
48 ( $p=0.001$ ) while family members' age, survivors' age, number of weeks since COVID-19 diagnosis,  
49 existing health condition and hospital stay were not significant predictors of QoL of family members  
50  
51  
52  
53  
54  
55  
56  
57  
58  
59  
60



1 (Table 7). The multiple regression analyses confirmed that the QoL of family members/partner was  
2  
3  
4 more impacted than survivors, female family members were affected more than males, family  
5  
6 members with a history of COVID-19 were affected more than those without and partners were  
7  
8 affected substantially more than those of other relationships. In addition, the model predicted that  
9  
10 younger survivors' functional behaviour (both physical and psychosocial) was more impacted by  
11  
12 COVID-19.  
13  
14  
15  
16  
17  
18  
19  
20  
21  
22  
23  
24  
25  
26  
27  
28  
29  
30  
31  
32  
33  
34  
35  
36  
37  
38  
39  
40  
41  
42  
43  
44  
45  
46  
47  
48  
49  
50  
51  
52  
53  
54  
55  
56  
57  
58  
59  
60

For peer review only

**Table 5** Correlation † matrix demonstrating the relationships between EQ-5D, FROM-16 and the participant demographics (n=735)

|                                          | EQ-5D score | FROM-16 score | EQ-VAS (n=733) | Survivor age (years) | Survivor gender | Survivor hospital stay for COVID-19 | Survivor existing health condition | Number of weeks since COVID-19 diagnosis | Family member age (years) | Family member gender |
|------------------------------------------|-------------|---------------|----------------|----------------------|-----------------|-------------------------------------|------------------------------------|------------------------------------------|---------------------------|----------------------|
| EQ-5D score                              | 1           |               |                |                      |                 |                                     |                                    |                                          |                           |                      |
| FROM-16 score                            | 0.467**     | 1             |                |                      |                 |                                     |                                    |                                          |                           |                      |
| EQ-VAS (n=733)                           | -0.591**    | -0.346**      | 1              |                      |                 |                                     |                                    |                                          |                           |                      |
| Survivor age (years)                     | -0.020      | -0.118*       | -0.075         | 1                    |                 |                                     |                                    |                                          |                           |                      |
| Survivor gender                          | 0.077*      | -0.024        | -0.102*        | 0.064                | 1               |                                     |                                    |                                          |                           |                      |
| Survivor hospital stay for COVID-19      | 0.127*      | 0.073         | -0.097*        | 0.143*               | -0.091*         | 1                                   |                                    |                                          |                           |                      |
| Survivor existing health condition       | 0.093*      | 0.066         | -0.104*        | 0.201**              | 0.036           | 0.134*                              | 1                                  |                                          |                           |                      |
| Number of weeks since COVID-19 diagnosis | 0.164*      | 0.029         | -0.218         | 0.158*               | 0.032           | 0.097*                              | 0.042                              | 1                                        |                           |                      |
| Family member age (years)                | -0.015      | -0.077        | -0.025         | 0.535**              | 0.066           | 0.034                               | 0.145*                             | 0.108*                                   | 1                         |                      |
| Family member gender                     | -0.030      | 0.031         | 0.032          | -0.008               | -0.507**        | 0.097*                              | 0.050                              | -0.034                                   | -0.113*                   | 1                    |

† Spearman's Rank; \*p ≤ 0.05, \*\*p ≤ 0.01, 2-tailed.

**Table 6** Summary of survivors' characteristics predicting EQ-5D scores\* (n=735)

| Predictor                                | Unstandardised coefficients |            | Standardised coefficients | p-value | 95% confidence interval levels for B |             | R <sup>2</sup> | Adjusted R <sup>2</sup> | F-test | p-value |
|------------------------------------------|-----------------------------|------------|---------------------------|---------|--------------------------------------|-------------|----------------|-------------------------|--------|---------|
|                                          | B                           | Std. Error | Beta                      |         | Lower level                          | Upper Level |                |                         |        |         |
| Survivor Age                             | -0.013                      | 0.006      | -0.076                    | 0.043   | -0.025                               | 0.000       | 0.058          | 0.051                   | 8.907  | 0.0001  |
| Existing health condition                | 0.298                       | 0.157      | 0.070                     | 0.059   | -0.011                               | 0.607       |                |                         |        |         |
| Hospital stay for COVID-19               | 0.644                       | 0.181      | 0.131                     | 0.0001  | 0.288                                | 1.001       |                |                         |        |         |
| Number of weeks since COVID-19 diagnosis | 0.050                       | 0.012      | 0.154                     | 0.0001  | 0.027                                | 0.073       |                |                         |        |         |
| Male gender                              | -0.471                      | 0.169      | -0.101                    | 0.005   | -0.802                               | -0.139      |                |                         |        |         |

\*Multiple regression; B=the slope of the line between the predictor variable and the dependent variable – the larger the number, the more spread out the points are from the regression line; F-test=degree of the linear regression model fitting the data; R<sup>2</sup> = how well the model fits the data; Males=1 and females =0; females are the reference group.

**Table 7** Summary of family member/partner characteristics predicting FROM-16 scores\* (n=753)

| Predictor                                | Unstandardised coefficients |            | Standardised coefficients | p-value | 95% confidence interval levels for B |             | R <sup>2</sup> | Adjusted R <sup>2</sup> | F-test | p-value |
|------------------------------------------|-----------------------------|------------|---------------------------|---------|--------------------------------------|-------------|----------------|-------------------------|--------|---------|
|                                          | B                           | Std. Error | Beta                      |         | Lower Level                          | Upper Level |                |                         |        |         |
|                                          |                             |            |                           |         |                                      |             | 0.272          | 0.260                   | 22.506 | 0.0001  |
| EQ-5D score                              | 2.019                       | 0.134      | 0.495                     | 0.001   | 1.757                                | 2.282       |                |                         |        |         |
| Age family member                        | -0.044                      | 0.030      | -0.073                    | 0.144   | -0.102                               | 0.015       |                |                         |        |         |
| Number of weeks since COVID-19 diagnosis | -0.064                      | 0.043      | -0.048                    | 0.144   | -0.149                               | 0.022       |                |                         |        |         |
| Male Family member                       | -1.357                      | 0.587      | -0.080                    | 0.021   | -2.510                               | -0.204      |                |                         |        |         |
| Have you also had COVID-19?              | 1.138                       | 0.524      | 0.071                     | 0.030   | 0.109                                | 2.167       |                |                         |        |         |
| Relationship                             |                             |            |                           |         |                                      |             |                |                         |        |         |
| parent                                   | -1.061                      | 1.204      | -0.033                    | 0.379   | -3.426                               | 1.303       |                |                         |        |         |
| sons and daughters                       | -3.243                      | 1.108      | -0.123                    | 0.004   | -5.419                               | -1.067      |                |                         |        |         |
| brothers and sisters                     | -4.079                      | 1.476      | -0.090                    | 0.006   | -6.977                               | -1.180      |                |                         |        |         |
| other                                    | -2.728                      | 1.827      | -0.048                    | 0.136   | -6.314                               | 0.859       |                |                         |        |         |
| Survivor age                             | -0.040                      | 0.032      | -0.059                    | 0.201   | -0.103                               | 0.022       |                |                         |        |         |
| Survivor existing health condition       | 0.658                       | 0.574      | 0.038                     | 0.252   | -0.468                               | 1.785       |                |                         |        |         |
| Survivor hospital stay for COVID-19      | 0.547                       | 0.660      | 0.027                     | 0.408   | -0.749                               | 1.842       |                |                         |        |         |

\*Multiple regression; B=the slope of the line between the predictor variable and the dependent variable – the larger the number, the more spread out the points are from the regression line; F-test=degree of the linear regression model fitting the data; R<sup>2</sup>=how well the model fits the data; Males=1 and females =0; females are the reference group.

## DISCUSSION

This study fills an important knowledge gap in measuring the impact of COVID-19 on the HRQoL of both the survivors and, importantly, their partners and family members. Health-related quality of life is defined as a person's perception of his/her physical, mental, social and overall well-being (8, 9).

Therefore, its assessment embraces a wider view of the impact of COVID-19.

This study has revealed that the pandemic has a major impact on lives of those who have survived the infection. The survey depended on the patient's self-report of the diagnosis of COVID-19 infection and did not specifically ask whether patients had had a COVID-19 positive test. However, further authentication of the diagnosis is given by both the patient and their relative having answered the survey. Pain and discomfort were the most frequently reported problem by COVID-19 survivors, followed by impact on their usual activities, anxiety and depression, affecting females to a greater extent. As the majority of COVID-19 survivors were in paid employment, being physically unwell might have impacted their usual activities or return to work. According to a review on return to work after critical illness (10), globally, a third of previously employed survivors after intensive care stays remained out of work after five years.

In the survey, COVID-19 survivors were asked whether they were 'already suffering from some existing chronic health condition (such as diabetes, heart disease, lung disease)' prior to the infection with COVID-19. Survivors with existing health conditions did not differ significantly from those without such conditions except for mobility and usual activities however, having an existing health condition was not a significant predictor of impact on the family member/partner's QoL. The survivor's QoL was impacted greatly irrespective of having an existing health condition as it was not clear predictor of EQ-5D scores in regression analysis. Hospitalised survivors reported greater impact on mobility, self-care and usual activities compared to those who had not been hospitalised. This survey did not ask respondents whether those hospitalised were admitted to ICU. So we are not able to draw any conclusion concerning the relationship of admission to ICU to later QoL.

The study also revealed a major impact on QoL of the survivors' partners and family members with partners being most impacted. Currently Minimal Clinically Important Difference (MCID) for

1 FROM-16 has not been published; however, MCID values for such questionnaires usually are  
2  
3 approximately 10-20% of the total score range, and so we would expect the FROM-16 MCID to be  
4  
5 approximately 3 to 6. If this is the case, the statistically significant differences reported would also be  
6  
7 clinically significant. Nearly half of participating partners and family members also reported having  
8  
9 had COVID-19. Although there were no significant differences between the family members with  
10  
11 COVID-19 and those without across 10 of the 16 QoL items of FROM-16, eating habits, family  
12  
13 activities, holiday, sleep, sex-life and work or study were impacted significantly more in those who  
14  
15 had had COVID-19. Overall FROM-16 scores were higher for partners and family members with  
16  
17 COVID-19 after adjusting for age, gender, relationship to survivor and the overall survivors' EQ-5D  
18  
19 scores, thus indicating poorer QoL for family members with COVID-19 than for those without.  
20  
21

22  
23 Most partners and family members reported being worried and frustrated, many reported sadness,  
24  
25 inability to talk to someone and difficulty in caring for their loved ones. This is not surprising in a  
26  
27 situation with constant media coverage with emphasis on high daily death rates, the fear of infecting  
28  
29 loved ones, stigma due to community or family members blaming survivors for the spread of the  
30  
31 illness, isolation of loved ones, inability of a family member to provide support, and prolonged  
32  
33 recovery time (11). Such stressors have been implicated in the poor psychological and emotional  
34  
35 health of survivors and their family members (11-14).  
36  
37

38  
39 Family members reported an impact on sexual life as a result of their relative's COVID-19 and this  
40  
41 impact was higher in males and in family members who has also contracted COVID-19. Two-thirds  
42  
43 of family members were either spouses or partners, who could have experienced these difficulties  
44  
45 because of the contagious nature of COVID-19 and because of post survival symptoms. Moreover,  
46  
47 physical illness in partners has a significant impact on marital relationships, contributing to marital  
48  
49 dissatisfaction and likelihood of later divorce (15). Over half of partners and family members reported  
50  
51 impact on holidays and nearly half reported an increase in expenses due to their relative's COVID-19.  
52  
53

54  
55 One of the key findings of this study is the evidence that in survivors in whom the COVID-19 onset  
56  
57 was more than 12 weeks ago, there was still a major persisting impact on QoL across all domains in  
58  
59 both survivors and family members. This provides further evidence of the severe impact of post-  
60

1 acute COVID-19 (“Long COVID”) and “Chronic COVID” (16). According to NICE, the term ‘long  
2 COVID’ “ is commonly used to describe signs and symptoms that continue or develop after acute  
3 COVID-19. It includes both ongoing symptomatic COVID-19 (from 4 to 12 weeks) and post-COVID-  
4 COVID-19 syndrome (12 weeks or more)” (17). The term ‘Persisting’ refers to the continuity of the impact of  
5 COVID-19 on survivor’s health since the onset of COVID-19 infection.  
6  
7

8  
9  
10  
11 Interestingly, of the patients who participated, most (76.6%) were women, as found in other  
12 surveys(18); however, there was a higher proportion of men among participating family members  
13 (66.5%). This may be because the majority of COVID-19 social media support groups have been  
14 initiated by women (patients), and the most convenient family person to ask to participate might be  
15 their partners (mostly male).  
16  
17

### 18 **Comparison with other studies**

19 Chinese survivors of COVID-19 reported lower HRQoL with significant impact on their physical and  
20 psychological health, one month after recovery (19). Our study has shown a major impact not only on  
21 the HRQoL of survivors of COVID-19 but also on their partners and family members. This is  
22 consistent with the findings of Golics et al. (2, 20) that multiple elements of family members' lives  
23 can be affected by a relative's illness including emotional, financial, family relationships, education  
24 and work, leisure time, and social activities.  
25  
26

27 Our study has shown that most (87%) survivors had COVID-19 for more than 4 weeks, and 64%  
28 more than 12 weeks indicating that survivors continued to remain unwell for long periods of time, due  
29 to post-viral symptoms or ‘long COVID’. This is in contrast to a UK COVID-19 symptom study (21),  
30 where only 10% of COVID-19 positive survivors remained unwell at three weeks, and a small  
31 proportion for more than three months. An online survey of British doctors in August 2020 revealed  
32 that many were being treated for long term COVID-19 symptoms such as chronic fatigue, muscle  
33 weakness, loss of sense of smell, and concentration difficulties (22)  
34  
35

36 In our study 69% COVID-19 survivors reported feelings of anxiety and depression, much higher than  
37 the 43.1% reported by Ma Y-F et al. (9) in clinically stable patients with COVID-19. Previous studies  
38 of Severe Acute Respiratory Syndrome (SARS) revealed the persistence of depression in patients up  
39 to 30 months after discharge from hospital (23, 24).  
40  
41  
42  
43  
44  
45  
46  
47  
48  
49  
50  
51  
52  
53  
54  
55  
56  
57  
58  
59  
60

1 Several studies have shown the impact of COVID-19 on sleep patterns of survivors, with an increase  
2 in prevalence of insomnia (25-27). We do not know whether the sleep patterns of survivors in our  
3 study were also impacted, since EQ-5D does not include such an item. However, in our study 69 %  
4 of partners and family members experienced problems with sleep, and 32% reported that their sleep  
5 was impacted “a lot”.  
6  
7  
8  
9  
10

11 The total mean domain scores for FROM-16 in this study were 6.12 (Emotional) and 8.88 (Personal  
12 and Social Life) which are higher than the mean domain scores reported by Golics et al. (5)  
13 (Emotional=5.6; Personal and Social Life=6.7) on the impact of patients’ chronic disease on family  
14 members across 26 medical specialties. Another study (4) reported the mean domain scores of family  
15 members of patients with cancer as Emotional=4.7 and Personal and Social Life=7.1. In a FROM-16  
16 study on family members of patients with urinary stone disease, family members were not impacted  
17 much by their relative’s disease, however they reported a slightly greater degree of change in the  
18 ‘emotional’ domain compared with the ‘personal and social life’ domain (28). This indicates that  
19 family members of COVID-19 survivors suffered more than family members of patients with other  
20 severe chronic diseases.  
21  
22  
23  
24  
25  
26  
27  
28  
29  
30  
31  
32  
33

### 34 **Strengths and Limitations.**

35 This study to our knowledge is the first global study to explore the impact of COVID-19 on both  
36 survivors and also their family members/partner. Other strengths include the large sample size,  
37 heterogenous population and use of validated tools to assess QoL impact. The study has demonstrated  
38 use of the FROM-16 questionnaire for studying the effects of a pandemic on family members of an  
39 infected person.  
40  
41  
42  
43  
44  
45  
46

47 This study has several limitations. Firstly, it suffers from considerable selection bias as only those  
48 COVID-19 survivors and family members who could access the internet and were active on social  
49 media completed the online questionnaires, limiting generalisability of the study findings. It is also  
50 possible that people who experienced persisting symptoms may have been more likely to have  
51 participated in the study. This survey was conducted internationally in the English language. Although  
52 FROM-16 is available to researchers in several languages, our full survey documents and the  
53 participant information sheet were only available to the participants in the English language, and in  
54  
55  
56  
57  
58  
59  
60

1 the survey FROM-16 was also only provided in English. Participants could only take part if they  
2 could understand all of the documentation. The ability of some respondents to read and understand  
3 English may have been limited, but we are not able to assess this. However, during the development  
4 of, in particular, FROM-16, the following issues were considered as part of its conceptualisation and  
5 development in order to improve its universality and translatability: 1) applying readability to the level  
6 of understanding of a 12 year old; 2) formatting of the items into short and complete sentences of  
7 about six words to enhance clarity of meaning; 3) ensuring ease of understanding to allow future  
8 cross-cultural adaptation, facilitating universality and translatability. Although we did not develop the  
9 EQ-5D, that questionnaire was also designed to be as universally understandable as possible.

10 Concerning the wider survey questions, we took several steps in the development of the survey to  
11 ensure maximum comprehensibility: 1) We ensured that the readability was acceptable to a 12-year-  
12 old standard; 2) We carried out an international pilot including participants for whom English was not  
13 their first language and made adjustments accordingly; 3) The survey was reviewed by our patient  
14 study research partners.

15 Secondly, the study, being cross-sectional, cannot establish causal relationships among the study  
16 variables. Because of the nature of the study, we could not collect any baseline measurements (pre-  
17 COVID-19 measurements). We are, therefore, not able to differentiate between the effect of COVID-  
18 19 infection or of a pre-existing physical or mental state. However, only 30.9% of respondents had  
19 any existing health condition, and therefore this limitation only refers to this small proportion of  
20 respondents. In addition, as all the covariates in the study were self-reported, data on hospitalisation  
21 and medical problems could be inaccurate and is a potential limitation(29). This study does not have a  
22 control group but in healthy volunteers in the UK, mean EQ-5D scores were EQ-VAS = 82.75,  
23 Mobility = 0.18, Self-Care = 0.04, Usual Activity = 0.16, Pain/Discomfort = 0.33, Anxiety /  
24 Depression = 0.20 (30). In contrast, COVID-19 survivors (47.1 % of survey respondents were from  
25 the UK) in our study had mean scores of EQ-VAS = 55.83, Mobility = 1.59, Self-Care = 1.23, Usual  
26 Activity = 2.06, Pain / Discomfort = 1.93, Anxiety / Depression = 1.84. This suggests that overall  
27 HRQoL was highly impaired in the COVID-19 survivors across all domains. Furthermore, the study  
28 was carried out between June and August 2020 when the severity of the pandemic varied among  
29  
30  
31  
32  
33  
34  
35  
36  
37  
38  
39  
40  
41  
42  
43  
44  
45  
46  
47  
48  
49  
50  
51  
52  
53  
54  
55  
56  
57  
58  
59  
60



1 different countries. Therefore, the study results may have been influenced by the specific local and  
2 governmental measures in place at the time. It is likely that participants will have been living under  
3 different government restrictions, thereby possibly influencing responses to the questionnaires.  
4  
5 However, because of the complexity of the international situation, we are not able to account for this.  
6  
7 Although formal cultural adaptation of the survey questionnaire was not carried out, we endeavoured  
8 to ensure maximum understandability and acceptability. It should be noted that the questions asked  
9 are mostly universal in nature and do not refer to culturally specific practices such as semantic  
10 differences. However, despite these limitations, the study has provided a rapid overview of survivors'  
11 and their family members' HRQoL and revealed evidence of the substantial persisting effect on QoL  
12 of survivors and a major secondary impact on the lives of partners and family members. This  
13 information can be used to inform policymakers about the health needs of these individuals and may  
14 encourage the development of tailor-made support services.  
15  
16  
17  
18  
19  
20  
21  
22  
23  
24  
25  
26

### 27 **Implications for clinicians and policymakers**

28  
29 Our results have shown how the impact of COVID-19 on one family member can have a domino  
30 effect on other family members, especially those close to them such as partner, parents and children. It  
31 is important to understand the needs of these impacted family members and survivors to ensure the  
32 overall wellbeing of the family unit. Based on the findings of this study, policymakers should consider  
33 developing and commissioning the following support services for survivors and family members:  
34  
35  
36  
37  
38

39 *Post COVID-19 clinics:* Survivors reported pain and discomfort even after 12 weeks of COVID-19,  
40 indicating that tailored services to deal with such symptoms are important to help survivors suffering  
41 with long term sequelae. Survivors with post-COVID-19 complications should be heard and treated.  
42  
43  
44

45 Although such clinics have been started in a few countries, there is a considerable need for such  
46 initiatives globally.  
47  
48

49 *Needs-based mental health counselling:* Most family members and survivors reported being depressed  
50 and worried. It is imperative to further develop care services to ensure the mental wellbeing of  
51 survivors and their family members.  
52  
53  
54

55 *Physical activity and rehabilitation services:* Most survivors have reported pain and discomfort and  
56 an inability to do their normal activities. Rehabilitation clinics could provide emotional and physical  
57  
58  
59  
60

1 support to physically and emotionally drained survivors and their family members to enable their  
2  
3 return to normal routines.  
4  
5

6 *Social support services:* Patients with COVID-19 are from diverse backgrounds and therefore will  
7  
8 benefit from culturally and socially appropriate support. Financial assistance is particularly important  
9  
10 for those who do not have health insurance to cover COVID-19 expenses.  
11  
12

13 *Patient support groups/local support groups for COVID-19 survivors and family members:* Local  
14  
15 support groups could be used in primary care settings and can help by significantly combating  
16  
17 isolation and the disability the study has identified that occurs in COVID-19 survivors and their  
18  
19 family members/partners. This could in turn have health economic benefits by possibly reducing long-  
20  
21 term utilisation of mental health services. Similar approaches have been successful, for example in  
22  
23 supporting people with myalgic encephalitis.  
24  
25

## 26 **Future research and recommendations**

27  
28 Although this study provided an overview of the impact of COVID-19 on survivors' partners and  
29  
30 family members, it was not designed to identify causal relationship. Future longitudinal studies are  
31  
32 needed to understand the long-term impact of COVID-19. As COVID-19 is still a major challenge,  
33  
34 with people experiencing 'long COVID', there is a need for further research including long term  
35  
36 studies to better understand 'long COVID' and its impacts on survivors and family members.  
37  
38

39 However, the way the participants were recruited for the current study does not allow us to have  
40  
41 access to follow-up data from this cohort. We were unable to measure the impact of COVID-19 on  
42  
43 sleep and sex-life of survivors, future studies should measure such impacts.  
44  
45

## 46 **CONCLUSION**

47  
48 Survivors of COVID-19 report a major persisting impact on their QoL with many feeling unwell  
49  
50 beyond 12 weeks. This indicates a demand for a holistic support system that is sensitive to their needs.  
51  
52 Moreover, the QoL of partners and family members is also severely impacted, demonstrating the  
53  
54 importance of investigating disease impact on family QoL. The establishment of services to provide  
55  
56 support to family members of survivors and patients in general is therefore a key consideration in the  
57  
58  
59  
60

1 future management of COVID-19. Although the recruitment method used inevitably leads to some  
2 degree of selection bias which in turn may dilute the generalisability of the study findings, the central  
3 conclusions of this study, that COVID-19 has a profound and long-lasting impact on survivors and  
4 their family members continue to remain valid.  
5  
6  
7  
8  
9

## 10 11 12 **Acknowledgements**

13 We are grateful to all the COVID-19 survivors and family members/partners who participated in this  
14 study. We are grateful to the other 'patient and family research' study partners, Helen Allen and  
15 Marie Nixon, for their invaluable contribution.  
16

17 **Funding:** There was no external funding for this Cardiff University study.  
18

19 **Competing interests:** All authors have completed the ICMJE uniform disclosure form  
20 at [www.icmje.org/coi\\_disclosure.pdf](http://www.icmje.org/coi_disclosure.pdf) and declare: no support from any organisation for the submitted  
21 work; RS and SJN declared no competing interest, AYF and SS are joint copyright owners of Family  
22 Reported Outcome Measure (FROM-16). JRI reports personal fees from UCB Pharma, personal fees  
23 from Novartis, personal fees from Boehringer Ingelheim, personal fees from Kymera Therapeutics,  
24 personal fees from Viela Bio, personal fees from UpToDate, personal fees from Editor of British  
25 Journal of Dermatology, outside the submitted work; in addition, JRI is co-copyright holder of the  
26 Hidradenitis Suppurativa Quality of Life (HiSQOL) score. FMA reports grants and personal fees from  
27 Janssen, personal fees from Abbvie, personal fees from Lilly Pharmaceuticals, personal fees from  
28 L'Oreal, personal fees from LEO Pharmaceuticals, personal fees from UCB, outside the submitted  
29 work.  
30  
31  
32

33 **Author contributions:** RS primarily carried out the study. wrote first drafts and revised all  
34 documentation. SS and AYF equally contributed to the design and supervision of the study and  
35 revised all study documentation and the manuscript. FMA, JRI and SJN provided advice during the  
36 study and helped revise study documentation. FMA, JRI and SJN reviewed the manuscript. The  
37 corresponding author attests that all listed authors meet authorship criteria and that no others meeting  
38 the criteria have been omitted.  
39

40 **Public and Patient Involvement (PPI):** Twenty members of the public, including some work  
41 colleagues, participated in the pilot study. Some had experience of having COVID-19 patient in their  
42 family. The study sociodemographic questions were extensively modified following the outcome of  
43 the pilot study. The 'patients and family member group' consisting of two patients and one family  
44 member, were involved as study research partners. This group was involved in reviewing the study  
45 protocol, other related documents and the manuscript.  
46  
47

48 **Ethical approval:** Ethics approval was granted by the Cardiff University School of Medicine  
49 Research Ethics Committee (SMREC 20/60).  
50

51 **Data sharing:** This paper does not report a trial. If requested, we are happy to share our data.  
52

53 **Transparency statement:** The lead author RS affirms that this manuscript is an honest, accurate, and  
54 transparent account of the study being reported; that no important aspects of the study have been  
55 omitted; and that any discrepancies from the study as planned (and, if relevant, registered) have been  
56 explained.  
57

58 **Dissemination to participants and related patient and public communities:** The summary of the  
59 results will also be disseminated by social media using the same methods as used for recruiting  
60

1 participants and made accessible to public and patients through the Cardiff University FROM-16  
2 website page  
3  
4  
5

## 6 **Figure legends**

7 **Figure 1** COVID-19 survivor response to EQ-5D-3L (n=735)

8 **Figure 2** Partner and family member response to FROM-16 items (n=735)  
9  
10  
11  
12  
13

## 14 **References**

- 15 1. Holmes EA, O'Connor RC, Perry VH, Tracey I, Wessely S, Arseneault L, et al. Multidisciplinary  
16 research priorities for the COVID-19 pandemic: a call for action for mental health science. *The*  
17 *Lancet Psychiatry*. 2020;7(6):547-60.
- 18 2. Golics CJ, Basra MK, Salek MS, Finlay AY. The impact of patients' chronic disease on family  
19 quality of life: an experience from 26 specialties. *Int J Gen Med*. 2013;6:787-98.
- 20 3. Jisc. Online Surveys. Jisc, Bristol, UK. 2020 [Available from: <https://www.onlinesurveys.ac.uk/>].
- 21 4. EQ-5D-3L. User Guide 2018 [Available from: Available from:  
22 <https://euroqol.org/publications/user-guides>].
- 23 5. Golics CJ, Basra MK, Finlay AY, Salek S. The development and validation of the Family  
24 Reported Outcome Measure (FROM-16)© to assess the impact of disease on the partner or family  
25 member. *Quality of life research : an international journal of quality of life aspects of treatment,*  
26 *care and rehabilitation*. 2014;23(1):317-26.
- 27 6. FROM-16. Family Reported Outcome Measure [Online] 2020 [Available from: Available:  
28 [https://www.cardiff.ac.uk/medicine/resources/quality-of-life-questionnaires/family-reported-](https://www.cardiff.ac.uk/medicine/resources/quality-of-life-questionnaires/family-reported-outcome-measure)  
29 [outcome-measure](https://www.cardiff.ac.uk/medicine/resources/quality-of-life-questionnaires/family-reported-outcome-measure)].
- 30 7. Chantarasap P, Johns NP, Pairojkul S, Sookprasert A, Wirasorn K, Cheawchanwattana A, et al.  
31 Validation of the Thai version of the family reported outcome measure (FROM-16)© to assess the  
32 impact of disease on the partner or family members of patients with cancer. *Health Qual Life*  
33 *Outcomes*. 2019;17(1):32.
- 34 8. Papakostas GI, Petersen T, Mahal Y, Mischoulon D, Nierenberg AA, Fava M. Quality of life  
35 assessments in major depressive disorder: a review of the literature. *Gen Hosp Psychiatry*.  
36 2004;26(1):13-7.
- 37 9. Ma Y-F, Li W, Deng H-B, Wang L, Wang Y, Wang P-H, et al. Prevalence of depression and its  
38 association with quality of life in clinically stable patients with COVID-19. *J Affect Disord*.  
39 2020;275:145-8.
- 40  
41  
42  
43  
44  
45  
46  
47  
48  
49  
50  
51  
52  
53  
54  
55  
56  
57  
58  
59  
60

10. Kamdar BB, Suri R, Suchyta MR, Digrande KF, Sherwood KD, Colantuoni E, et al. Return to work after critical illness: a systematic review and meta-analysis. *Thorax*. 2020;75(1):17-27.
11. Sahoo S, Mehra A, Suri V, Malhotra P, Yaddanapudi LN, Dutt Puri G, et al. Lived experiences of the corona survivors (patients admitted in COVID wards): A narrative real-life documented summaries of internalized guilt, shame, stigma, anger. *Asian J Psychiatr*. 2020;53:102187-.
12. Tansey CM, Louie M, Loeb M, Gold WL, Muller MP, de Jager J, et al. One-Year Outcomes and Health Care Utilization in Survivors of Severe Acute Respiratory Syndrome. *Archives of Internal Medicine*. 2007;167(12):1312-20.
13. Li Q, Guan X, Wu P, Wang X, Zhou L, Tong Y, et al. Early Transmission Dynamics in Wuhan, China, of Novel Coronavirus–Infected Pneumonia. *New England Journal of Medicine*. 2020;382(13):1199-207.
14. Xiang Y-T, Yang Y, Li W, Zhang L, Zhang Q, Cheung T, et al. Timely mental health care for the 2019 novel coronavirus outbreak is urgently needed. *The Lancet Psychiatry*. 2020;7(3):228-9.
15. Daniel K, Wolfe CDA, Busch MA, McKeivitt C. What Are the Social Consequences of Stroke for Working-Aged Adults? *Stroke*. 2009;40(6):e431-e40.
16. Greenhalgh T, Knight M, A'Court C, Buxton M, Husain L. Management of post-acute covid-19 in primary care. *BMJ*. 2020;370:m3026.
17. NICE. Overview | COVID-19 rapid guideline: managing the long-term effects of COVID-19 | Guidance. 2020.
18. Davis HE, Assaf GS, McCorkell L, Wei H, Low RJ, Re'em Y, et al. Characterizing Long COVID in an International Cohort: 7 Months of Symptoms and Their Impact. *medRxiv*. 2020:2020.12.24.20248802.
19. Chen K-Y, Li T, Gong F-H, Zhang J-S, Li X-K. Predictors of Health-Related Quality of Life and Influencing Factors for COVID-19 Patients, a Follow-Up at One Month. *Frontiers in Psychiatry*. 2020;11(668).
20. Golics CJ, Basra MKA, Finlay AY, Salek S. The impact of disease on family members: a critical aspect of medical care. *Journal of the Royal Society of Medicine*. 2013;106(10):399-407.
21. COVID Symptom Study. How long does COVID-19 last? Kings College London 2020 [Available from: [https://covid.joinzoe.com/post/covid-long-term?fbclid=IwAR1RxIcmmdL-EFjh\\_aI-](https://covid.joinzoe.com/post/covid-long-term?fbclid=IwAR1RxIcmmdL-EFjh_aI-)].
22. Rimmer A. Covid-19: Impact of long term symptoms will be profound, warns BMA. *BMJ*. 2020;370:m3218.

- 1  
2  
3  
4  
5  
6  
7  
8  
9  
10  
11  
12  
13  
14  
15  
16  
17  
18  
19  
20  
21  
22  
23  
24  
25  
26  
27  
28  
29  
30  
31  
32  
33  
34  
35  
36  
37  
38  
39  
40  
41  
42  
43  
44  
45  
46  
47  
48  
49  
50  
51  
52  
53  
54  
55  
56  
57  
58  
59  
60
23. Wu KK, Chan SK, Ma TM. Posttraumatic stress, anxiety, and depression in survivors of severe acute respiratory syndrome (SARS). *J Trauma Stress*. 2005;18(1):39-42.
24. Mak IW, Chu CM, Pan PC, Yiu MG, Chan VL. Long-term psychiatric morbidities among SARS survivors. *Gen Hosp Psychiatry*. 2009;31(4):318-26.
25. Fu W, Wang C, Zou L, Guo Y, Lu Z, Yan S, et al. Psychological health, sleep quality, and coping styles to stress facing the COVID-19 in Wuhan, China. *Transl Psychiatry*. 2020;10(1):225-.
26. Marelli S, Castelnuovo A, Somma A, Castronovo V, Mombelli S, Bottoni D, et al. Impact of COVID-19 lockdown on sleep quality in university students and administration staff. *Journal of Neurology*. 2020.
27. Gualano MR, Lo Moro G, Voglino G, Bert F, Siliquini R. Effects of Covid-19 Lockdown on Mental Health and Sleep Disturbances in Italy. *Int J Environ Res Public Health*. 2020;17(13).
28. Raja A, Wood F, Joshi HB. The impact of urinary stone disease and their treatment on patients' quality of life: a qualitative study. *Urolithiasis*. 2020;48(3):227-34.
29. Caraballo C, Khera R, Jones PG, Decker C, Schulz W, Spertus JA, et al. Rates and Predictors of Patient Underreporting of Hospitalizations During Follow-Up After Acute Myocardial Infarction. *Circulation: Cardiovascular Quality and Outcomes*. 2020;13(7):e006231.
30. Szende A, Janssen B. Cross-Country Analysis of EQ-5D Data. In: Szende A, Janssen B, Cabases J, editors. *Self-Reported Population Health: An International Perspective based on EQ-5D*. Dordrecht: Springer Netherlands; 2014. p. 31-6.

Figure1 COVID-19 survivor response to EQ-5D-3L (n=735)

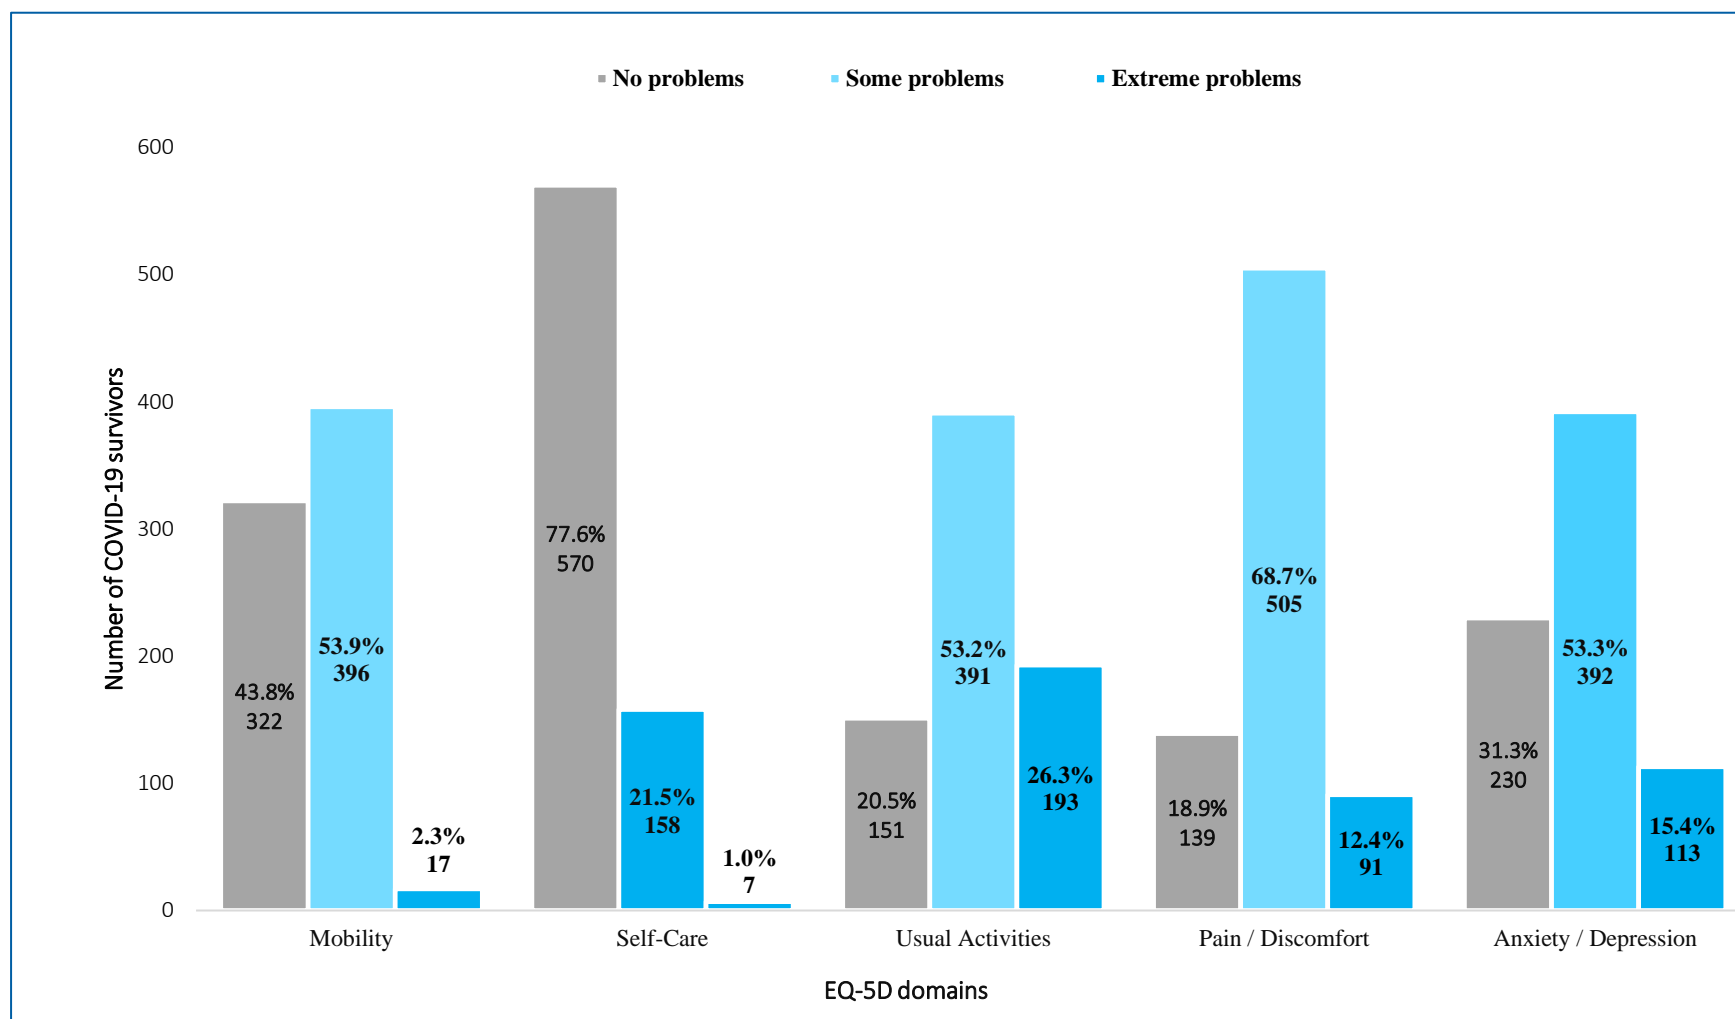





| Section/Topic             | Item # | Recommendation                                                                                                                                                                       | Page No  | Relevant text from the manuscript                  |
|---------------------------|--------|--------------------------------------------------------------------------------------------------------------------------------------------------------------------------------------|----------|----------------------------------------------------|
| <b>Title and abstract</b> | 1      | (a) Indicate the study's design with a commonly used term in the title or the abstract                                                                                               | 2        | Abstract                                           |
|                           |        | (b) Provide in the abstract an informative and balanced summary of what was done and what was found                                                                                  | 2        | Abstract page 1                                    |
| <b>Introduction</b>       |        |                                                                                                                                                                                      |          |                                                    |
| Background/rationale      | 2      | Explain the scientific background and rationale for the investigation being reported                                                                                                 | 3        | Introduction- paragraph 1, 2                       |
| Objectives                | 3      | State specific objectives, including any prespecified hypotheses                                                                                                                     | 4        | Introduction- paragraph 3                          |
| <b>Methods</b>            |        |                                                                                                                                                                                      |          |                                                    |
| Study design              | 4      | Present key elements of study design early in the paper                                                                                                                              | 4, 5     | Methods                                            |
| Setting                   | 5      | Describe the setting, locations, and relevant dates, including periods of recruitment, exposure, follow-up, and data collection                                                      | 4-5      | Methods-setting/ participants / procedure          |
| Participants              | 6      | (a) Give the eligibility criteria, and the sources and methods of selection of participants                                                                                          | 5        | Method-procedure                                   |
| Variables                 | 7      | Clearly define all outcomes, exposures, predictors, potential confounders, and effect modifiers. Give diagnostic criteria, if applicable                                             | 6        | Methods -outcome /exposure/Covariates/missing data |
| Data sources/ measurement | 8*     | For each variable of interest, give sources of data and details of methods of assessment (measurement). Describe comparability of assessment methods if there is more than one group | 6        | Methods-Measurements tools                         |
| Bias                      | 9      | Describe any efforts to address potential sources of bias                                                                                                                            | 7, 14-15 | Methods and Regression                             |
| Study size                | 10     | Explain how the study size was arrived at                                                                                                                                            |          | Study Size = Exploratory                           |
| Quantitative variables    | 11     | Explain how quantitative variables were handled in the analyses. If applicable, describe which groupings were chosen and why                                                         | 7        | Statistical analysis                               |
| Statistical methods       | 12     | (a) Describe all statistical methods, including those used to control for confounding                                                                                                | 7        |                                                    |
|                           |        | (b) Describe any methods used to examine subgroups and interactions                                                                                                                  | 7-17     | Statistical analysis and Tables 1-7                |
|                           |        | (c) Explain how missing data were addressed                                                                                                                                          | 7        | There were no missing data                         |
|                           |        | (d) If applicable, describe analytical methods taking account of sampling strategy                                                                                                   |          | Exploratory                                        |
|                           |        | (e) Describe any sensitivity analyses                                                                                                                                                |          | Not applicable                                     |

|    |                   |     |                                                                                                                                                                                                                |       |                                                                                                                                                                                                                                                        |
|----|-------------------|-----|----------------------------------------------------------------------------------------------------------------------------------------------------------------------------------------------------------------|-------|--------------------------------------------------------------------------------------------------------------------------------------------------------------------------------------------------------------------------------------------------------|
| 1  |                   |     |                                                                                                                                                                                                                |       |                                                                                                                                                                                                                                                        |
| 2  | <b>Results</b>    |     |                                                                                                                                                                                                                |       |                                                                                                                                                                                                                                                        |
| 3  | Participants      | 13* | (a) Report numbers of individuals at each stage of study—eg numbers potentially eligible, examined for eligibility, confirmed eligible, included in the study, completing follow-up, and analysed              | 7     | Results section                                                                                                                                                                                                                                        |
| 4  |                   |     | (b) Give reasons for non-participation at each stage                                                                                                                                                           |       | Not applicable                                                                                                                                                                                                                                         |
| 5  |                   |     | (c) Consider use of a flow diagram                                                                                                                                                                             |       | Not applicable                                                                                                                                                                                                                                         |
| 6  | Descriptive data  | 14* | (a) Give characteristics of study participants (eg demographic, clinical, social) and information on exposures and potential confounders                                                                       | 7-8   | Table 1 descriptive analysis                                                                                                                                                                                                                           |
| 7  |                   |     | (b) Indicate number of participants with missing data for each variable of interest                                                                                                                            |       | NA (no missing data)                                                                                                                                                                                                                                   |
| 8  | Outcome data      | 15* | Report numbers of outcome events or summary measures                                                                                                                                                           | 7     | Results and Tables/Figures                                                                                                                                                                                                                             |
| 9  | Main results      | 16  | (a) Give unadjusted estimates and, if applicable, confounder-adjusted estimates and their precision (e.g., 95% confidence interval). Make clear which confounders were adjusted for and why they were included | 7-17  | Results section-Table 3, 4 and 5. Multiple regression Tables 6 and 7                                                                                                                                                                                   |
| 10 |                   |     | (b) Report category boundaries when continuous variables were categorised                                                                                                                                      |       | Not Applicable                                                                                                                                                                                                                                         |
| 11 |                   |     | (c) If relevant, consider translating estimates of relative risk into absolute risk for a meaningful time period                                                                                               |       | Not Applicable                                                                                                                                                                                                                                         |
| 12 | Other analyses    | 17  | Report other analyses done—eg analyses of subgroups and interactions, and sensitivity analyses                                                                                                                 | 10-13 | Results – Sub group analysis- male /female; hospitalise for COVID-19/not hospitalised ; Pre-existing health condition / No pre-existing health condition; partner and Family member 's with COVID / Partner and family not having COVID Tables 3 and 4 |
| 13 |                   |     |                                                                                                                                                                                                                |       |                                                                                                                                                                                                                                                        |
| 14 |                   |     |                                                                                                                                                                                                                |       |                                                                                                                                                                                                                                                        |
| 15 |                   |     |                                                                                                                                                                                                                |       |                                                                                                                                                                                                                                                        |
| 16 |                   |     |                                                                                                                                                                                                                |       |                                                                                                                                                                                                                                                        |
| 17 |                   |     |                                                                                                                                                                                                                |       |                                                                                                                                                                                                                                                        |
| 18 |                   |     |                                                                                                                                                                                                                |       |                                                                                                                                                                                                                                                        |
| 19 |                   |     |                                                                                                                                                                                                                |       |                                                                                                                                                                                                                                                        |
| 20 |                   |     |                                                                                                                                                                                                                |       |                                                                                                                                                                                                                                                        |
| 21 |                   |     |                                                                                                                                                                                                                |       |                                                                                                                                                                                                                                                        |
| 22 |                   |     |                                                                                                                                                                                                                |       |                                                                                                                                                                                                                                                        |
| 23 |                   |     |                                                                                                                                                                                                                |       |                                                                                                                                                                                                                                                        |
| 24 |                   |     |                                                                                                                                                                                                                |       |                                                                                                                                                                                                                                                        |
| 25 |                   |     |                                                                                                                                                                                                                |       |                                                                                                                                                                                                                                                        |
| 26 |                   |     |                                                                                                                                                                                                                |       |                                                                                                                                                                                                                                                        |
| 27 |                   |     |                                                                                                                                                                                                                |       |                                                                                                                                                                                                                                                        |
| 28 |                   |     |                                                                                                                                                                                                                |       |                                                                                                                                                                                                                                                        |
| 29 |                   |     |                                                                                                                                                                                                                |       |                                                                                                                                                                                                                                                        |
| 30 |                   |     |                                                                                                                                                                                                                |       |                                                                                                                                                                                                                                                        |
| 31 |                   |     |                                                                                                                                                                                                                |       |                                                                                                                                                                                                                                                        |
| 32 |                   |     |                                                                                                                                                                                                                |       |                                                                                                                                                                                                                                                        |
| 33 | <b>Discussion</b> |     |                                                                                                                                                                                                                |       |                                                                                                                                                                                                                                                        |
| 34 | Key results       | 18  | Summarise key results with reference to study objectives                                                                                                                                                       | 18-19 | 16-17                                                                                                                                                                                                                                                  |
| 35 | Limitations       | 19  | Discuss limitations of the study, taking into account sources of potential bias or imprecision. Discuss both direction and magnitude of any potential bias                                                     | 20    | Strengths and Limitation section                                                                                                                                                                                                                       |
| 36 | Interpretation    | 20  | Give a cautious overall interpretation of results considering objectives, limitations, multiplicity of analyses, results from similar studies, and other relevant evidence                                     | 20-21 | Strengths and limitation / comparison with other studies                                                                                                                                                                                               |
| 37 |                   |     |                                                                                                                                                                                                                |       |                                                                                                                                                                                                                                                        |
| 38 |                   |     |                                                                                                                                                                                                                |       |                                                                                                                                                                                                                                                        |
| 39 |                   |     |                                                                                                                                                                                                                |       |                                                                                                                                                                                                                                                        |
| 40 |                   |     |                                                                                                                                                                                                                |       |                                                                                                                                                                                                                                                        |
| 41 |                   |     |                                                                                                                                                                                                                |       |                                                                                                                                                                                                                                                        |
| 42 |                   |     |                                                                                                                                                                                                                |       |                                                                                                                                                                                                                                                        |
| 43 |                   |     |                                                                                                                                                                                                                |       |                                                                                                                                                                                                                                                        |
| 44 |                   |     |                                                                                                                                                                                                                |       |                                                                                                                                                                                                                                                        |
| 45 |                   |     |                                                                                                                                                                                                                |       |                                                                                                                                                                                                                                                        |
| 46 |                   |     |                                                                                                                                                                                                                |       |                                                                                                                                                                                                                                                        |

1  
2  
3  
4  
5  
6  
7  
8  
9  
10  
11  
12  
13  
14  
15  
16  
17  
18  
19  
20  
21  
22  
23  
24  
25  
26  
27  
28  
29  
30  
31  
32  
33  
34  
35  
36  
37  
38  
39  
40  
41  
42  
43  
44  
45  
46

|                          |    |                                                                                                                                                                |    |                                   |
|--------------------------|----|----------------------------------------------------------------------------------------------------------------------------------------------------------------|----|-----------------------------------|
| Generalisability         | 21 | Discuss the generalisability (external validity) of the study results                                                                                          | 20 | Strengths and limitations section |
| <b>Other information</b> |    |                                                                                                                                                                |    |                                   |
| Funding                  | 22 | Give the source of funding and the role of the funders for the present study and, if applicable, for the original study on which the present article is based. | 24 | Funding section                   |

**STROBE 2007 (v4) Statement—Checklist of items that should be included in reports of *cross-sectional studies***

\*Give information separately for cases and controls in case-control studies and, if applicable, for exposed and unexposed groups in cohort and cross-sectional studies.

**Note:** An Explanation and Elaboration article discusses each checklist item and gives methodological background and published examples of transparent reporting. The STROBE checklist is best used in conjunction with this article (freely available on the Web sites of PLoS Medicine at <http://www.plosmedicine.org/>, Annals of Internal Medicine at <http://www.annals.org/>, and Epidemiology at <http://www.epidem.com/>). Information on the STROBE Initiative is available at [www.strobe-statement.org](http://www.strobe-statement.org).
